# Supplementary material for: Pathway-specific dysregulation of striatal excitatory synapses by LRRK2 mutations
Source: eLife. 2020 Oct 2;9:e58997. doi: 10.7554/eLife.58997 (PMC7609054; doi:10.7554/eLife.58997)
Supplement: Figure 1—figure supplement 1—source data 1. [file elife-58997-fig1-figsupp1-data1.xlsx]

## Sheet: Figure1-figure suuplement 1C
PSD95/Homer1 (a.u.)										PSD95 (fold change over +/+)
+/+			+/RC			+/GS				+/+			+/RC			+/GS
S1	P2	PSD	S1	P2	PSD	S1	P2	PSD		S1	P2	PSD	S1	P2	PSD	S1	P2	PSD
0.536333	2.30375	2.56161	0.359728	3.22128	2.52386	0.492957	2.53945	3.59409		1	1	1	0.652622	1.17852	0.745769	0.852025	0.836415	1.29456
0.475083	2.16199	2.57303	0.590614	2.14288	2.47806	0.56479	1.47615	2.86556		1	1	1	1.30889	0.896196	0.655256	1.16223	0.647279	1.14165
0.330279	1.05208	2.60159	0.180642	1.36712	2.15933	0.129063	1.6848	2.71826		1	1	1	1.32324	0.926893	0.954847	1.21136	1.12857	1.15878
0.58555	1.70233	2.13806	0.416853	2.58907	1.84144	0.250461	1.05768	2.42622		1	1	1	0.948521	1.33238	1.49049	0.670914	1.5861	1.44001
0.39444	0.81297	1.41137	0.364962	0.652375	1.02221	0.524894	0.704648	1.4021		1	1	1	1.14579	0.995283	0.879228	0.357441	1.06641	1.05487
1.17111	1.36407	2.235	0.798258	1.48729	1.60526	0.361377	1.45262	2.97664
1.04183	1.89385	1.30444	0.883939	1.61245	0.636508	0.82876	1.58479	1.2324
1.34374	1.87694	3.59533	1.68804	1.42249	3.57763	1.81521	2.0745	1.68904
1.29442	1.06296	0.86102	1.28865	1.65005	1.04943	0.766011	1.74242	0.790868
