# Supplementary material for: Pathway-specific dysregulation of striatal excitatory synapses by LRRK2 mutations
Source: eLife. 2020 Oct 2;9:e58997. doi: 10.7554/eLife.58997 (PMC7609054; doi:10.7554/eLife.58997)
Supplement: Figure 1—source data 1. [file elife-58997-fig1-data1.xlsx]

## Sheet: Figure1F
PSD GluA1/PSD95 (a.u.)
+/+	+/RC	+/GS
0.877914	1.13281	0.989711
1.11796	1.28466	1.30332
0.9276	1.3867	1.3991
1.2714	1.9631	1.4372
1.11824	2.30625	1.05019
1.03589	1.26103	1.4189

## Sheet: Figure1G
PSD p-PKA/PSD95 (a.u.)
+/+	+/RC	+/GS
1.40937	1.80092	2.19668
1.41194	1.66074	1.52746
1.4541	2.99342	1.60875
1.5126	1.78362	1.14881
1.23942	3.87352	2.36776
1.30402	1.82711	1.01218
