# Supplementary material for: Pathway-specific dysregulation of striatal excitatory synapses by LRRK2 mutations
Source: eLife. 2020 Oct 2;9:e58997. doi: 10.7554/eLife.58997 (PMC7609054; doi:10.7554/eLife.58997)
Supplement: Figure 2—figure supplement 1—source data 1. [file elife-58997-fig2-figsupp1-data1.xlsx]

## Sheet: Figure2&3-figure supplement 1A
+/+	+/RC	+/GS
0.22	0.77	0.52
0.28	0.8	0.41
0.29	0.67	0.27
0.09	0.3	0.33
0.86	0.47	0.57
1.06	0.69	0.64
0.59	0.57	0.51
0.91	0.44	0.61
0.29	0.48	0.16
0.4	0.64	0.4
0.99	1.1	0.37
0.59	0.21	0.37
0.16	0.25	0.2
1	0.27	0.53
0.57	0.42	0.59
0.69	0.39	0.25
0.75	0.27	0.3
0.6	0.53	0.26
0.4	0.61	0.42
0.76	0.6	0.24
0.45	0.75	0.27
0.34	0.67	0.31
0.42	0.45	0.28
1.07	0.07	0.63
0.23	0.16	0.17
1.2	0.09	0.42
0.42	0.44	0.17
0.35	0.27	0.03
0.49	0.43	0.32
0.39	0.59	0.32
0.76	0.28	1.05
0.26	0.25	0.38
0.19	0.31	0.18
0.56	0.27	0.8
0.38	0.75	0.43
0.42	0.6	0.48
0.47	0.36	0.47
0.3	0.31	0.34
0.36	0.31	0.78
0.22	0.25	0.42
0.18	1.25	0.41
0.28	0.34	0.59
0.34	0.27	0.25
0.36	0.37	0.38
0.54	0.28	0.18
0.49	0.11	0.19
0.3	0.41	0.46
0.58	0.25	0.71
0.42	0.16	0.49
0.41	0.1	0.34
0.35	0.42	0.18
0.37	0.21	0.34
0.19	0.15	0.12
0.74	0.56	0.37
0.63	0.36	0.68
0.25	0.09	0.24
0.21	0.17	0.19
0.16	0.36	0.28
0.54	0.55	0.29
0.2	0.45	0.31
0.35	0.28	0.44
0.82	0.39	0.15
0.31	0.18	0.09
0.52	0.33	0.72
0.62	0.36	0.24
0.46	0.45	0.2
0.18	0.11	0.07
0.46	0.25	0.13
0.51	0.59	0.26
0.28	0.74	0.31
0.11	0.22	0.2
0.44	0.15	0.27
0.14	0.37	0.39
0.21	0.46	0.17
0.13	0.2	0.38
0.17		0.26
0.17		0.16
0.23		0.16
0.24		0.3
0.34		0.19
0.5		0.26
0.25
0.42
0.36
0.27
0.77
0.55
0.17
0.23
0.54
0.12
0.34
0.17

## Sheet: Figure2&3-figure supplement 1B
Bin Center	+/+	+/RC	+/GS
0	0	0	1.23457
0.1	5.31915	8	6.17284
0.2	25.5319	21.3333	29.6296
0.3	43.617	46.6667	58.0247
0.4	62.766	65.3333	76.5432
0.5	75.5319	74.6667	85.1852
0.6	85.1064	86.6667	92.5926
0.7	87.234	92	96.2963
0.8	92.5532	97.3333	98.7654
0.9	94.6809	97.3333	98.7654
1	96.8085	97.3333	98.7654
1.1	98.9362	98.6667	100
1.2	100	98.6667	100
1.3	100	100	100

## Sheet: Figure2&3-figure supplement 1C
+/+	+/RC	+/GS
0.17	0.43	0.12
0.19	0.34	0.33
0.25	0.18	0.22
0.24	0.28	0.34
0.06	0.29	0.24
0.17	0.21	0.64
0.05	0.22	0.66
0.1	0.12	0.28
0.11	0.17	0.53
0.23	0.19	0.46
0.18	0.16	0.66
0.1	0.12	0.39
0.05	0.18	0.63
0.15	0.1	0.72
0.3	0.1	0.58
0.15	0.22	0.4
0.3	0.11	0.38
0.11	0.19	0.59
0.17	0.02	0.47
0.19	0.1	0.55
0.14	0.1	0.4
0.2	0.21	0.42
0.27	0.1	0.28
0.2	0.11	0.3
0.1	0.35	0.29
0.46	0.39	0.67
0.17	0.35	0.18
0.8	0.28	0.4
0.22	0.28	0.45
0.22	0.41	0.57
0.28	0.54	0.49
0.21	0.27	0.49
0.34	0.27	0.16
0.39	0.29	0.15
0.28	0.34	0.6
0.26	0.26	0.17
0.45	0.37	0.17
0.63	0.23	0.39
0.4	0.41	0.34
0.42	0.39	0.33
0.47	0.49	0.42
0.31	0.37	0.36
0.37	0.39	0.47
0.34	0.39	0.58
0.34	0.31	0.28
0.28	0.45	0.41
0.51	0.35	0.58
0.11	0.74	0.38
0.41	0.34	0.16
0.36	0.39	0.22
0.31	0.33	0.38
0.24	0.47	0.12
0.28	0.75	0.11
0.2	0.73	0.26
0.09	0.64	0.21
0.46	0.61	0.27
0.34	0.41	0.27
0.19	0.42	0.19
0.21	0.24	0.38
0.47	0.97	0.72
0.5	0.52	0.7
0.29	0.36	0.52
0.19	0.62	0.68
0.35	0.51	0.19
0.42	0.34	0.22
0.14	0.2	0.28
0.27	0.4	0.53
0.31	0.36	0.36
0.24	0.47	0.49
0.34	0.18	0.17
0.35	0.29	0.19
0.32	0.6	0.39
	0.27	0.29
		0.32
		0.5
		0.35
		0.22
		0.14
		0.14
		0.14
		0.34
		0.32
		0.13
		0.56
		0.4

## Sheet: Figure2&3-figure supplement 1D
Bin Center	+/+	+/RC	+/GS
0	0	1.36986	0
0.1	16.6667	13.6986	8.23529
0.2	47.2222	32.8767	27.0588
0.3	75	54.7945	47.0588
0.4	87.5	79.4521	67.0588
0.5	97.2222	89.0411	80
0.6	98.6111	94.5205	91.7647
0.7	98.6111	97.2603	100
0.8	100	98.6301	100
0.9	100	98.6301	100
1	100	100	100
