# Supplementary material for: Pathway-specific dysregulation of striatal excitatory synapses by LRRK2 mutations
Source: eLife. 2020 Oct 2;9:e58997. doi: 10.7554/eLife.58997 (PMC7609054; doi:10.7554/eLife.58997)
Supplement: Figure 2—source data 1. [file elife-58997-fig2-data1.xlsx]

## Sheet: Figure2D
+/+	+/RC	+/GS
0.02	0.17	0.04
0.25	0.04	0.09
0.03	0.05	0.11
0.32	0.13	0.07
0.05	0.09	0
0.06	0.06	0.02
0.08	0.05	0.11
0.12	0.3	0.08
0.1	0.07	0
0.1	0.02	0.1
0.04	0.02	0.1
0.07	0.08	0.09
0.19	0	0.11
0.05	0.06	0.12
0.03	0.05	0.1
0.17	0	0.04
0.4	0.02	0.05
0.15	0	0
0.18	0.03	0.05
0.13	0.01	0.09
0.09	0.01	0.21
0.24	0	0
0.07	0.05	0.08
0.06	0	0.28
0.05	0.09	0.23
0.3	0.04	0.03
0.24	0.01	0.07
0.01	0.03	0.25
0.12	0.03	0.08
0	0.08	0.08
0	0	0.09
0.32	0.13	0.1
0.11	0.02	0.14
0.05	0.05	0.02
0.01	0.04	0.06
0.01	0	0
0.11	0	0.01
0.15	0.06	0.24
0.04	0.02	0.08
0.15	0.06	0.1
0.12	0.06	0.08
0.06	0.1	0.02
0.03	0.05	0
0.09	0.05	0.01
0.08	0.27	0.09
0.14	0	0.14
0.18	0.03	0.08
0	0	0.03
0	0	0.08
0.02	0	0.05
0.01	0	0.03
0.11	0.03	0.16
0.04	0.09	0.09
0	0.04	0
0.02	0.14	0.03
0.07	0.11	0.03
0	0.07	0.02
0.07	0.07	0.02
0.06	0.07	0.06
0.06	0	0.07
0.02	0.01	0.01
0.09	0	0.06
0.02	0	0.31
0.03	0.08	0.08
0	0	0.07
0.18	0.05	0
0.05	0.02	0.06
0.06	0.05	0.06
0	0.06	0.06
0.1	0.16	0.01
0.05	0.04	0.02
0	0.08	0
0	0.01	0.03
0.04	0.02	0.02
0.08	0.12	0.04
0.07		0
0.11		0.01
0.04		0.04
0.07		0
0		0.08
0.21		0.08
0.03
0
0.07
0.03
0.06
0.11
0.1
0.02
0
0.08
0.04
0

## Sheet: Figure2E
Bin Center	+/+	+/RC	+/GS
0	15.0538	22.6667	13.5802
0.02	25.8065	38.6667	28.3951
0.04	38.7097	52	40.7407
0.06	52.6882	72	51.8519
0.08	64.5161	82.6667	70.3704
0.1	72.043	88	83.9506
0.12	80.6452	90.6667	88.8889
0.14	82.7957	94.6667	91.358
0.16	86.0215	96	92.5926
0.18	90.3226	97.3333	92.5926
0.2	91.3978	97.3333	92.5926
0.22	92.4731	97.3333	93.8272
0.24	94.6237	97.3333	96.2963
0.26	95.6989	97.3333	97.5309
0.28	95.6989	98.6667	98.7654
0.3	96.7742	100	98.7654
0.32	98.9247	100	100
0.34	98.9247	100	100
0.36	98.9247	100	100
0.38	98.9247	100	100
0.4	100	100	100

## Sheet: Figure2F
+/+	+/RC	+/GS
0.07	0.12	0.25
0.05	0.05	0.13
0.05	0.24	0.04
0.004	0.04	0.02
0.04	0.09	0.28
0.11	0.36	0.35
0.09	0.59	0.26
0.07	0.13	0.28
0.07	0.19	0.04
0.04	0.26	0.18
0.19	0.03	0.2
0.16	0.02	0.12
0.01	0.05	0.08
0.31	0.07	0.15
0.04	0.17	0.22
0.023	0.07	0.02
0.19	0.28	0.09
0.11	0.16	0.07
0.03	0.14	0.06
0.03	0.1	0.03
0.12	0.22	0.02
0.06	0.03	0.04
0.12	0.02	0.01
0.15	0.08	0.31
0.03	0.05	0.06
0.21	0.17	0.11
0.05	0.05	0.05
0.11	0.16	0.01
0.21	0.21	0.11
0.12	0.11	0.14
0.07	0.15	0.25
0.003	0.09	0.11
0.17	0.07	0.02
0.13	0.34	0.13
0.1	0.3	0.11
0.1	0.11	0.13
0.08	0.09	0.07
0.13	0.09	0.01
0.02	0.08	0.27
0.02	0.63	0.03
0.05	0.03	0.07
0.06	0.03	0.02
0.06	0.09	0.08
0.2	0.13	0.09
0.15	0.02	0.04
0.06	0.04	0.05
0.31	0.15	0.11
0.15	0.04	0.18
0.16	0.02	0.1
0.17	0.11	0.05
0.13	0.05	0.06
0.08	0.04	0.03
0.23	0.14	0.02
0.03	0.11	0.04
0.03	0.06	0.37
0.02	0.06	0.03
0.01	0.07	0.03
0.18	0.12	0.02
0.03	0.17	0.04
0.2	0.05	0.13
0.16	0.13	0.06
0.13	0.09	0.02
0.13	0.11	0
0.09	0.06	0.09
0.13	0.33	0.11
0.1	0.02	0.003
0.09	0.09	0.02
0.09	0.16	0.02
0.05	0.16	0.07
0.03	0.14	0.11
0.13	0.1	0.04
0.07	0.18	0.14
0.11	0.13	0.15
0.05	0.13	0.08
0.05		0.03
0.03		0.09
0.04		0.02
0.07		0.1
0.11		0.12
0.2		0.07
0.06		0.05
0.007
0.07
0.04
0.11
0.13
0.02
0.06
0.1
0.07
0.11
0.04
0.08

## Sheet: Figure2G
Bin Center	+/+	+/RC	+/GS
0	10.7527	6.75676	19.7531
0.05	48.3871	35.1351	51.8519
0.1	70.9677	59.4595	74.0741
0.15	88.172	82.4324	83.9506
0.2	96.7742	87.8378	88.8889
0.25	97.8495	90.5405	93.8272
0.3	100	93.2432	97.5309
0.35	100	97.2973	100
0.4	100	97.2973	100
0.45	100	97.2973	100
0.5	100	97.2973	100
0.55	100	97.2973	100
0.6	100	98.6486	100
0.65	100	100	100

## Sheet: Figure2H
+/+	+/RC	+/GS
31.8182	15.5844	48.0769
17.8571	6.25	31.7073
17.2414	35.8209	14.8148
4.44444	13.3333	6.06061
4.65116	19.1489	49.1228
10.3774	52.1739	54.6875
15.2542	98.2456	50.9804
7.69231	2.27273	45.9016
24.1379	27.0833	25
10	29.6875	45
19.1919	23.6364	54.054
27.1186	14.2857	32.4324
6.25	8	40
31	18.5185	28.3019
7.01754	16.6667	37.2881
3.33333	43.5897	8
25.3333	25.9259	30
18.3333	52.8302	26.9231
7.5	26.2295	14.2857
3.94737	23.3333	12.5
26.6667	13.3333	7.40741
17.6471	32.8358	12.9032
28.5714	6.66667	3.57143
14.0187	28.5714	49.2064
13.0435	50	35.2941
17.5	55.5556	26.1905
11.9048	38.6364	29.4118
31.4286	18.5185	33.3333
42.8571	37.2093	34.375
30.7692	35.5932	43.75
26.9231	39.2857	23.8095
1.57895	60	28.9474
30.3571	29.0323	11.1111
34.2105	25.9259	16.25
23.8095	45.3333	25.5814
21.2766	50	27.0833
26.6667	30.5556	14.8936
36.1111	29.0323	2.94118
9.09091	29.0323	34.6154
11.1111	32	7.14286
17.8571	50.4	17.0732
17.6471	8.82353	3.38983
16.6667	11.1111	32
37.037	24.3243	23.6842
30.6122	46.4286	22.2222
20	18.1818	26.3158
53.4483	9.7561	23.913
35.7143	60	25.3521
39.0244	25	20.4082
48.5714	20	14.7059
35.1351	26.1905	33.3333
42.1053	23.8095	8.82353
31.0811	26.6667	16.6667
4.7619	25	10.8108
12	30.5556	54.4118
9.52381	66.6667	12.5
6.25	35.2941	15.7895
33.3333	19.4444	7.14286
15	21.8182	13.7931
57.1429	37.7778	41.9355
19.5122	17.8571	13.6364
41.9355	33.3333	13.3333
25	50	0
14.5161	33.3333	12.5
28.2609	16.6667	45.8333
55.5556	73.3333	1.5
19.5652	18.1818	28.5714
17.6471	36	15.3846
17.8571	27.1186	26.9231
27.2727	21.6216	35.4839
29.5455	63.6364	20
50	66.6667	51.8518
52.381	48.6486	38.4615
38.4615	28.2609	47.0588
29.4118	65	7.89474
17.6471		34.6154
17.3913		12.5
29.1667		62.5
32.3529		40
40		36.8421
24		19.2308
1.66667
19.4444
14.8148
14.2857
23.6364
11.7647
26.087
18.5185
58.3333
32.3529
23.5294
26.6667

## Sheet: Figure2I
PSD area	overlap area
0.22	0.07
0.28	0.05
0.29	0.05
0.09	0.004
0.86	0.04
1.06	0.11
0.59	0.09
0.91	0.07
0.29	0.07
0.4	0.04
0.99	0.19
0.59	0.16
0.16	0.01
1	0.31
0.57	0.04
0.69	0.023
0.75	0.19
0.6	0.11
0.4	0.03
0.76	0.03
0.45	0.12
0.34	0.06
0.42	0.12
1.07	0.15
0.23	0.03
1.2	0.21
0.42	0.05
0.35	0.11
0.49	0.21
0.39	0.12
0.26	0.07
0.19	0.003
0.56	0.17
0.38	0.13
0.42	0.1
0.47	0.1
0.3	0.08
0.36	0.13
0.22	0.02
0.18	0.02
0.28	0.05
0.34	0.06
0.36	0.06
0.54	0.2
0.49	0.15
0.3	0.06
0.58	0.31
0.42	0.15
0.41	0.16
0.35	0.17
0.37	0.13
0.19	0.08
0.74	0.23
0.63	0.03
0.25	0.03
0.21	0.02
0.16	0.01
0.54	0.18
0.2	0.03
0.35	0.2
0.82	0.16
0.31	0.13
0.52	0.13
0.62	0.09
0.46	0.13
0.18	0.1
0.46	0.09
0.51	0.09
0.28	0.05
0.11	0.03
0.44	0.13
0.14	0.07
0.21	0.11
0.13	0.05
0.17	0.05
0.17	0.03
0.23	0.04
0.24	0.07
0.34	0.11
0.5	0.2
0.25	0.06
0.42	0.007
0.36	0.07
0.27	0.04
0.77	0.11
0.55	0.13
0.17	0.02
0.23	0.06
0.54	0.1
0.12	0.07
0.34	0.11
0.17	0.04
0.3	0.08

## Sheet: Figure2J
PSD area	overlap area
0.77	0.12
0.8	0.05
0.67	0.24
0.3	0.04
0.47	0.09
0.69	0.36
0.57	0.59
0.44	0.01
0.48	0.13
0.64	0.19
1.1	0.26
0.21	0.03
0.25	0.02
0.27	0.05
0.42	0.07
0.39	0.17
0.27	0.07
0.53	0.28
0.61	0.16
0.6	0.14
0.75	0.1
0.67	0.22
0.45	0.03
0.07	0.02
0.16	0.08
0.09	0.05
0.44	0.17
0.27	0.05
0.43	0.16
0.59	0.21
0.28	0.11
0.25	0.15
0.31	0.09
0.27	0.07
0.75	0.34
0.6	0.3
0.36	0.11
0.31	0.09
0.31	0.09
0.25	0.08
1.25	0.63
0.34	0.03
0.27	0.03
0.37	0.09
0.28	0.13
0.11	0.02
0.41	0.04
0.25	0.15
0.16	0.04
0.1	0.02
0.42	0.11
0.21	0.05
0.15	0.04
0.56	0.14
0.36	0.11
0.09	0.06
0.17	0.06
0.36	0.07
0.55	0.12
0.45	0.17
0.28	0.05
0.39	0.13
0.18	0.09
0.33	0.11
0.36	0.06
0.45	0.33
0.11	0.02
0.25	0.09
0.59	0.16
0.74	0.16
0.22	0.14
0.15	0.1
0.37	0.18
0.46	0.13
0.2	0.13

## Sheet: Figure2K
PSD area	overlap area
0.52	0.25
0.41	0.13
0.27	0.04
0.33	0.02
0.57	0.28
0.64	0.35
0.51	0.26
0.61	0.28
0.16	0.04
0.4	0.18
0.37	0.2
0.37	0.12
0.2	0.08
0.53	0.15
0.59	0.22
0.25	0.02
0.3	0.09
0.26	0.07
0.42	0.06
0.24	0.03
0.27	0.02
0.31	0.04
0.28	0.01
0.63	0.31
0.17	0.06
0.42	0.11
0.17	0.05
0.03	0.01
0.32	0.11
0.32	0.14
1.05	0.25
0.38	0.11
0.18	0.02
0.8	0.13
0.43	0.11
0.48	0.13
0.47	0.07
0.34	0.01
0.78	0.27
0.42	0.03
0.41	0.07
0.59	0.02
0.25	0.08
0.38	0.09
0.18	0.04
0.19	0.05
0.46	0.11
0.71	0.18
0.49	0.1
0.34	0.05
0.18	0.06
0.34	0.03
0.12	0.02
0.37	0.04
0.68	0.37
0.24	0.03
0.19	0.03
0.28	0.02
0.29	0.04
0.31	0.13
0.44	0.06
0.15	0.02
0.09	0
0.72	0.09
0.24	0.11
0.2	0.003
0.07	0.02
0.13	0.02
0.26	0.07
0.31	0.11
0.2	0.04
0.27	0.14
0.39	0.15
0.17	0.08
0.38	0.03
0.26	0.09
0.16	0.02
0.16	0.1
0.3	0.12
0.19	0.07
0.26	0.05
