# Supplementary material for: Pathway-specific dysregulation of striatal excitatory synapses by LRRK2 mutations
Source: eLife. 2020 Oct 2;9:e58997. doi: 10.7554/eLife.58997 (PMC7609054; doi:10.7554/eLife.58997)
Supplement: Figure 3—source data 1. [file elife-58997-fig3-data1.xlsx]

## Sheet: Figure3D
+/+	+/RC	+/GS
0	0	0.02
0.05	0.05	0.01
0	0	0.1
0	0.05	0.05
0.12	0.19	0
0.14	0.16	0.14
0.13	0.13	0.15
0.01	0.19	0.1
0.02	0.14	0.09
0.06	0	0.12
0.12	0	0.02
0.09	0.05	0
0.05	0.11	0
0.07	0	0.16
0.04	0	0.03
0	0.21	0.07
0	0.17	0.02
0.09	0	0.06
0.07	0.15	0
0.01	0.03	0.02
0.12	0	0.14
0	0.14	0
0	0	0
0.17	0.05	0.02
0.11	0.02	0.07
0.12	0	0.09
0.03	0.07	0.3
0	0.16	0.03
0.02	0	0.02
0.2	0	0.05
0.16	0.2	0
0	0.06	0.1
0	0.06	0.02
0	0.05	0.12
0.07	0.03	0
0.41	0.08	0.12
0.15	0.05	0.08
0.02	0.18	0.08
0.15	0.09	0.04
0.04	0.08	0.2
0.06	0.02	0.15
0.01	0.06	0
0.11	0.25	0.02
0.03	0.1	0.06
0.12	0.04	0
0.12	0	0.02
0.3	0.08	0.08
0.18	0.03	0
0.16	0.09	0.07
0.11	0.09	0
0.1	0.1	0.34
0.05	0.05	0.14
0.15	0.03	0.06
0.23	0.04	0.16
0.13	0.01	0.2
0	0.04	0.05
0	0.11	0.05
0.12	0.05	0.11
0	0.15	0.17
0.19	0.15	0.15
0.05	0.1	0.03
0.13	0.03	0.14
0.05	0.04	0.05
0.02	0.04	0.16
0	0	0.26
0.09	0.02	0.35
0	0.09	0.05
0.13	0.06	0
0.08	0.03	0
0.16	0.08	0
0.12	0.05	0
0.09	0.08	0
	0.19	0.06
		0.04
		0.02
		0
		0.08
		0.07
		0.01
		0.11
		0.24
		0.02
		0
		0.04
		0

## Sheet: Figure3E
Bin Center	+/+	+/RC	+/GS
0	22.2222	19.1781	23.5294
0.02	31.9444	24.6575	38.8235
0.04	37.5	39.726	45.8824
0.06	47.2222	57.5342	57.6471
0.08	52.7778	65.7534	67.0588
0.1	59.7222	75.3425	72.9412
0.12	75	78.0822	78.8235
0.14	81.9444	82.1918	83.5294
0.16	90.2778	89.0411	90.5882
0.18	93.0556	91.7808	91.7647
0.2	95.8333	97.2603	94.1176
0.22	95.8333	98.6301	94.1176
0.24	97.2222	98.6301	95.2941
0.26	97.2222	100	96.4706
0.28	97.2222	100	96.4706
0.3	98.6111	100	97.6471
0.32	98.6111	100	97.6471
0.34	98.6111	100	98.8235
0.36	98.6111	100	100
0.38	98.6111	100	100
0.4	98.6111	100	100
0.42	100	100	100

## Sheet: Figure3F
+/+	+/RC	+/GS
0.05	0.27	0.06
0.12	0.09	0.04
0.07	0.11	0.1
0.08	0.05	0.07
0.03	0.07	0.11
0.06	0.07	0.24
0.01	0.26	0.21
0.05	0.06	0.19
0.04	0.1	0.3
0.08	0.11	0.14
0.03	0.02	0.33
0.001	0.01	0.18
0.03	0.1	0.31
0.03	0.04	0.32
0.07	0.05	0.28
0.02	0.11	0.02
0.07	0.02	0.21
0.06	0.08	0.11
0.05	0.02	0.21
0.03	0.09	0.07
0.03	0.04	0.34
0.05	0.08	0.12
0.14	0.02	0.05
0.16	0.08	0.05
0.04	0.22	0.08
0.28	0.29	0.12
0.05	0.11	0.09
0.22	0.14	0.23
0.05	0.15	0.27
0.06	0.12	0.18
0.11	0.14	0.27
0.11	0.06	0.24
0.13	0.04	0.01
0.14	0.06	0.05
0.04	0.05	0.22
0.16	0.05	0.04
0.14	0.13	0.05
0.18	0.08	0.23
0.16	0.05	0.21
0.07	0.1	0.16
0.14	0.02	0.2
0.07	0.06	0.12
0.17	0.03	0.27
0.15	0.08	0.3
0.16	0.1	0.14
0.09	0.05	0.15
0.21	0.07	0.2
0.02	0.05	0.07
0.12	0.12	0.03
0.16	0.22	0.14
0.14	0.14	0.3
0.03	0.03	0.02
0.06	0.08	0.02
0.03	0.18	0.06
0.03	0.09	0.05
0.13	0.05	0.07
0.13	0.06	0.02
0.11	0.09	0.004
0.04	0.02	0.02
0.21	0.24	0.25
0.09	0.22	0.35
0.09	0.04	0.18
0.06	0.22	0.08
0.06	0.14	0.02
0.1	0.11	0.04
0.02	0.05	0.03
0.17	0.09	0.24
0.14	0.06	0.08
0.08	0.12	0.27
0.08	0.03	0.08
0.05	0.05	0.04
0.13	0.31	0.07
	0.05	0.12
		0.18
		0.07
		0.2
		0.11
		0.01
		0.04
		0.06
		0.06
		0.07
		0.06
		0.31
		0.31

## Sheet: Figure3G
Bin Center	+/+	+/RC	+/GS
0	1.38889	0	1.17647
0.02	6.94444	9.58904	10.5882
0.04	25	19.1781	18.8235
0.06	43.0556	42.4658	30.5882
0.08	55.5556	54.7945	43.5294
0.1	61.1111	67.1233	45.8824
0.12	68.0556	78.0822	54.1176
0.14	81.9444	84.9315	57.6471
0.16	90.2778	86.3014	60
0.18	94.4444	87.6712	64.7059
0.2	94.4444	87.6712	69.4118
0.22	98.6111	93.1507	75.2941
0.24	98.6111	94.5205	81.1765
0.26	98.6111	95.8904	82.3529
0.28	100	97.2603	88.2353
0.3	100	98.6301	91.7647
0.32	100	100	96.4706
0.34	100	100	98.8235
0.36	100	100	100

## Sheet: Figure3H
+/+	+/RC	+/GS
29.4118	62.7907	50
63.1579	26.4706	12.1212
28	61.1111	45.4545
33.3333	17.8571	20.5882
50	24.1379	45.8333
35.2941	33.3333	37.5
20	118.182	31.8182
50	50	67.8571
36.3636	58.8235	56.6038
34.7826	57.8947	30.4348
16.6667	12.5	50
1	8.33333	46.1538
60	55.5556	49.2064
20	40	44.4444
23.3333	50	48.2759
13.3333	50	5
23.3333	18.1818	55.2632
54.5455	42.1053	18.6441
29.4118	100	44.6808
15.7895	90	12.7273
21.4286	40	85
25	38.0952	28.5714
51.8518	20	17.8571
80	72.7273	16.6667
40	62.8571	27.5862
60.8696	74.359	17.9105
29.4118	31.4286	50
27.5	50	57.5
22.7273	53.5714	60
27.2727	29.2683	31.5789
39.2857	25.9259	55.102
52.3809	22.2222	48.9796
38.2353	14.8148	6.25
35.8974	20.6897	33.3333
14.2857	14.7059	36.6667
61.5385	19.2308	23.5294
31.1111	35.1351	29.4118
28.5714	34.7826	58.9744
40	12.1951	61.7647
16.6667	25.641	48.4849
29.7872	4.08163	47.6191
22.5806	16.2162	33.3333
45.946	7.69231	57.4468
44.1176	25.8065	51.7241
47.0588	22.2222	50
32.1429	12.8205	36.5854
41.1765	20	34.4828
18.1818	6.75676	18.4211
29.2683	35.2941	18.75
44.4444	56.4103	63.6364
45.1613	42.4242	78.9474
12.5	6.38298	16.6667
21.4286	10.6667	18.1818
15	24.6575	23.0769
33.3333	14.0625	23.8095
28.2609	8.19672	25.9259
38.2353	14.6341	7.40741
57.8947	21.4286	2.10526
19.0476	8.33333	5.26316
44.6808	24.7423	34.7222
18	42.3077	50
31.0345	11.1111	34.6154
31.5789	35.4839	11.7647
17.1429	27.451	10.5263
23.8095	32.3529	18.1818
14.2857	25	10.7143
62.963	22.5	45.283
45.1613	16.6667	22.2222
33.3333	25.5319	55.102
23.5294	16.6667	47.0588
14.2857	17.2414	21.0526
40.625	51.6667	17.9487
	18.5185	41.3793
		56.25
		14
		57.1429
		50
		7.14286
		28.5714
		42.8571
		17.6471
		21.875
		46.1538
		55.3571
		77.5

## Sheet: Figure3I
PSD area	overlap area
0.17	0.05
0.19	0.12
0.25	0.07
0.24	0.08
0.06	0.03
0.17	0.06
0.05	0.01
0.1	0.05
0.23	0.08
0.18	0.03
0.1	0.001
0.05	0.03
0.11	0
0.15	0.03
0.3	0.07
0.15	0.02
0.3	0.07
0.11	0.06
0.17	0.05
0.19	0.03
0.14	0.03
0.2	0.05
0.27	0.14
0.2	0.16
0.1	0.04
0.46	0.28
0.17	0.05
0.8	0.22
0.22	0.05
0.22	0.06
0.28	0.11
0.21	0.11
0.34	0.13
0.39	0.14
0.28	0.04
0.26	0.16
0.45	0.14
0.63	0.18
0.4	0.16
0.42	0.07
0.47	0.14
0.31	0.07
0.37	0.17
0.34	0.15
0.34	0.16
0.28	0.09
0.51	0.21
0.11	0.02
0.41	0.12
0.36	0.16
0.31	0.14
0.24	0.03
0.28	0.06
0.2	0.03
0.09	0.03
0.46	0.13
0.34	0.13
0.19	0.11
0.21	0.04
0.47	0.21
0.5	0.09
0.29	0.09
0.19	0.06
0.35	0.06
0.42	0.1
0.14	0.02
0.27	0.17
0.31	0.14
0.24	0.08
0.34	0.08
0.35	0.05
0.32	0.13

## Sheet: Figure3J
PSD area	overlap area
0.43	0.27
0.34	0.09
0.18	0.11
0.28	0.05
0.29	0.07
0.21	0.07
0.22	0.26
0.12	0.06
0.17	0.1
0.19	0.11
0.16	0.02
0.12	0.01
0.18	0.1
0.1	0.04
0.1	0.05
0.22	0.11
0.11	0.02
0.19	0.08
0.02	0.02
0.1	0.09
0.1	0.04
0.21	0.08
0.1	0.02
0.11	0.08
0.35	0.22
0.39	0.29
0.35	0.11
0.28	0.14
0.28	0.15
0.41	0.12
0.54	0.14
0.27	0.06
0.27	0.04
0.29	0.06
0.34	0.05
0.26	0.05
0.37	0.13
0.23	0.08
0.41	0.05
0.39	0.1
0.49	0.02
0.37	0.06
0.39	0.03
0.31	0.08
0.45	0.1
0.39	0.05
0.35	0.07
0.74	0.05
0.34	0.12
0.39	0.22
0.33	0.14
0.47	0.03
0.75	0.08
0.73	0.18
0.64	0.09
0.61	0.05
0.41	0.06
0.42	0.09
0.24	0.02
0.97	0.24
0.52	0.22
0.36	0.04
0.62	0.22
0.51	0.14
0.34	0.11
0.2	0.05
0.4	0.09
0.36	0.06
0.47	0.12
0.18	0.03
0.29	0.05
0.6	0.31
0.27	0.05

## Sheet: Figure3K
PSD area	overlap area
0.12	0.06
0.33	0.04
0.22	0.1
0.34	0.07
0.24	0.11
0.64	0.24
0.66	0.21
0.28	0.19
0.53	0.3
0.46	0.14
0.66	0.33
0.39	0.18
0.63	0.31
0.72	0.32
0.58	0.28
0.4	0.02
0.38	0.21
0.59	0.11
0.47	0.21
0.55	0.07
0.4	0.34
0.42	0.12
0.28	0.05
0.3	0.05
0.29	0.08
0.67	0.12
0.18	0.09
0.4	0.23
0.45	0.27
0.57	0.18
0.49	0.27
0.49	0.24
0.16	0.01
0.15	0.05
0.6	0.22
0.17	0.04
0.17	0.05
0.39	0.23
0.34	0.21
0.33	0.16
0.42	0.2
0.36	0.12
0.47	0.27
0.58	0.3
0.28	0.14
0.41	0.15
0.58	0.2
0.38	0.07
0.16	0.03
0.22	0.14
0.38	0.3
0.12	0.02
0.11	0.02
0.26	0.06
0.21	0.05
0.27	0.07
0.27	0.02
0.19	0.004
0.38	0.02
0.72	0.25
0.7	0.35
0.52	0.18
0.68	0.08
0.19	0.02
0.22	0.04
0.28	0.03
0.53	0.24
0.36	0.08
0.49	0.27
0.17	0.08
0.19	0.04
0.39	0.07
0.29	0.12
0.32	0.18
0.5	0.07
0.35	0.2
0.22	0.11
0.14	0.01
0.14	0.04
0.14	0.06
0.34	0.06
0.32	0.07
0.13	0.06
0.56	0.31
0.4	0.31
