# Supplementary material for: Pathway-specific dysregulation of striatal excitatory synapses by LRRK2 mutations
Source: eLife. 2020 Oct 2;9:e58997. doi: 10.7554/eLife.58997 (PMC7609054; doi:10.7554/eLife.58997)
Supplement: Figure 4—figure supplement 1—source data 1. [file elife-58997-fig4-figsupp1-data1.xlsx]

## Sheet: Figure 4- figure supplement 1
	GFP-				GFP+
Bin	+/+	+/RC	+/GS		+/+	+/RC	+/GS
5	53.7803	41.9388	57.9523		51.1966	49.6836	52.4525
5.04505	53.5686	41.9497	57.8186		51.1786	49.6683	52.4331
5.09009	53.3561	41.9588	57.6817		51.1581	49.6509	52.411
5.13514	53.1427	41.9661	57.5416		51.1352	49.6313	52.3862
5.18018	52.9285	41.9717	57.3983		51.1097	49.6097	52.3587
5.22523	52.7135	41.9755	57.2518		51.0818	49.586	52.3286
5.27027	52.4977	41.9775	57.1022		51.0514	49.5601	52.2958
5.31532	52.2811	41.9778	56.9494		51.0186	49.5322	52.2603
5.36036	52.0638	41.9764	56.7936		50.9833	49.5022	52.2222
5.40541	51.8457	41.9731	56.6347		50.9456	49.4701	52.1815
5.45045	51.6269	41.9682	56.4727		50.9054	49.4359	52.1381
5.4955	51.4075	41.9614	56.3078		50.8628	49.3996	52.0921
5.54054	51.1873	41.9529	56.1399		50.8178	49.3613	52.0435
5.58559	50.9664	41.9426	55.9691		50.7703	49.3208	51.9923
5.63063	50.7449	41.9306	55.7953		50.7204	49.2784	51.9384
5.67568	50.5228	41.9168	55.6186		50.6681	49.2338	51.882
5.72072	50.3	41.9013	55.4391		50.6134	49.1873	51.823
5.76577	50.0767	41.8841	55.2568		50.5563	49.1386	51.7614
5.81081	49.8527	41.865	55.0717		50.4968	49.0879	51.6972
5.85586	49.6282	41.8443	54.8838		50.435	49.0352	51.6304
5.9009	49.4032	41.8217	54.6932		50.3707	48.9805	51.5611
5.94595	49.1776	41.7975	54.4999		50.3042	48.9238	51.4893
5.99099	48.9514	41.7715	54.3039		50.2352	48.865	51.4149
6.03604	48.7248	41.7438	54.1053		50.1639	48.8042	51.338
6.08108	48.4977	41.7143	53.9041		50.0903	48.7414	51.2586
6.12613	48.2701	41.6831	53.7004		50.0144	48.6767	51.1767
6.17117	48.0421	41.6502	53.4941		49.9361	48.6099	51.0924
6.21622	47.8136	41.6156	53.2854		49.8556	48.5412	51.0055
6.26126	47.5847	41.5793	53.0742		49.7728	48.4705	50.9162
6.30631	47.3554	41.5412	52.8606		49.6877	48.3979	50.8244
6.35135	47.1257	41.5015	52.6446		49.6003	48.3233	50.7303
6.3964	46.8957	41.46	52.4262		49.5107	48.2468	50.6337
6.44144	46.6653	41.4169	52.2055		49.4188	48.1683	50.5347
6.48649	46.4345	41.372	51.9826		49.3247	48.088	50.4333
6.53153	46.2035	41.3255	51.7574		49.2285	48.0057	50.3295
6.57658	45.9721	41.2773	51.5301		49.13	47.9215	50.2234
6.62162	45.7405	41.2274	51.3006		49.0293	47.8354	50.115
6.66667	45.5085	41.1759	51.0689		48.9265	47.7475	50.0042
6.71171	45.2763	41.1227	50.8352		48.8215	47.6577	49.8911
6.75676	45.0439	41.0678	50.5994		48.7143	47.566	49.7757
6.8018	44.8112	41.0113	50.3616		48.6051	47.4725	49.6581
6.84685	44.5784	40.9532	50.1219		48.4937	47.3772	49.5382
6.89189	44.3453	40.8934	49.8802		48.3803	47.28	49.416
6.93694	44.1121	40.832	49.6366		48.2647	47.1811	49.2916
6.98198	43.8787	40.769	49.3912		48.1471	47.0803	49.1651
7.02703	43.6451	40.7044	49.144		48.0275	46.9778	49.0363
7.07207	43.4115	40.6382	48.8949		47.9058	46.8734	48.9054
7.11712	43.1777	40.5704	48.6442		47.7821	46.7674	48.7723
7.16216	42.9438	40.501	48.3918		47.6564	46.6596	48.6371
7.20721	42.7098	40.43	48.1377		47.5288	46.55	48.4998
7.25225	42.4758	40.3574	47.882		47.3992	46.4387	48.3605
7.2973	42.2417	40.2833	47.6247		47.2676	46.3258	48.219
7.34234	42.0075	40.2077	47.3659		47.1341	46.2111	48.0755
7.38739	41.7733	40.1305	47.1056		46.9988	46.0947	47.93
7.43243	41.5392	40.0517	46.8438		46.8615	45.9767	47.7825
7.47748	41.305	39.9715	46.5806		46.7224	45.8571	47.6329
7.52252	41.0708	39.8897	46.3161		46.5814	45.7358	47.4815
7.56757	40.8367	39.8065	46.0502		46.4386	45.6129	47.3281
7.61261	40.6027	39.7217	45.783		46.2939	45.4884	47.1727
7.65766	40.3687	39.6355	45.5146		46.1475	45.3623	47.0155
7.7027	40.1347	39.5478	45.245		45.9993	45.2346	46.8564
7.74775	39.9009	39.4586	44.9742		45.8494	45.1053	46.6954
7.79279	39.6672	39.368	44.7022		45.6977	44.9746	46.5327
7.83784	39.4336	39.2759	44.4292		45.5444	44.8422	46.3681
7.88288	39.2001	39.1824	44.1551		45.3893	44.7084	46.2017
7.92793	38.9668	39.0875	43.88		45.2326	44.5731	46.0336
7.97297	38.7336	38.9912	43.6039		45.0742	44.4363	45.8637
8.01802	38.5006	38.8935	43.3269		44.9142	44.298	45.6922
8.06306	38.2678	38.7945	43.049		44.7526	44.1583	45.5189
8.10811	38.0353	38.694	42.7703		44.5894	44.0172	45.344
8.15315	37.8029	38.5922	42.4908		44.4246	43.8746	45.1674
8.1982	37.5707	38.489	42.2104		44.2583	43.7306	44.9892
8.24324	37.3388	38.3845	41.9294		44.0905	43.5853	44.8095
8.28829	37.1072	38.2787	41.6476		43.9212	43.4386	44.6281
8.33333	36.8758	38.1716	41.3652		43.7504	43.2905	44.4453
8.37838	36.6447	38.0632	41.0822		43.5782	43.1411	44.2609
8.42342	36.4139	37.9535	40.7986		43.4046	42.9904	44.075
8.46847	36.1835	37.8425	40.5145		43.2295	42.8384	43.8877
8.51351	35.9533	37.7303	40.2299		43.053	42.6851	43.6989
8.55856	35.7235	37.6168	39.9448		42.8752	42.5306	43.5087
8.6036	35.494	37.5021	39.6593		42.6961	42.3748	43.3171
8.64865	35.2649	37.3862	39.3734		42.5156	42.2178	43.1242
8.69369	35.0361	37.2691	39.0871		42.3338	42.0596	42.9299
8.73874	34.8077	37.1508	38.8006		42.1508	41.9002	42.7343
8.78378	34.5797	37.0313	38.5138		41.9665	41.7396	42.5374
8.82883	34.3522	36.9106	38.2267		41.781	41.5779	42.3393
8.87387	34.125	36.7888	37.9395		41.5943	41.415	42.1399
8.91892	33.8983	36.6659	37.6521		41.4065	41.251	41.9393
8.96396	33.672	36.5418	37.3645		41.2174	41.0859	41.7375
9.00901	33.4461	36.4166	37.0769		41.0273	40.9198	41.5346
9.05405	33.2208	36.2904	36.7892		40.836	40.7526	41.3306
9.0991	32.9959	36.163	36.5016		40.6437	40.5843	41.1254
9.14414	32.7715	36.0346	36.2139		40.4503	40.415	40.9192
9.18919	32.5475	35.9052	35.9263		40.2558	40.2447	40.7119
9.23423	32.3241	35.7747	35.6388		40.0604	40.0734	40.5037
9.27928	32.1012	35.6432	35.3514		39.864	39.9012	40.2944
9.32432	31.8789	35.5107	35.0641		39.6666	39.7279	40.0841
9.36937	31.657	35.3772	34.7771		39.4683	39.5538	39.8729
9.41441	31.4358	35.2427	34.4903		39.269	39.3788	39.6608
9.45946	31.215	35.1072	34.2037		39.0689	39.2028	39.4478
9.5045	30.9949	34.9709	33.9174		38.8679	39.026	39.2339
9.54955	30.7753	34.8335	33.6315		38.666	38.8483	39.0192
9.59459	30.5563	34.6953	33.3459		38.4633	38.6698	38.8037
9.63964	30.3379	34.5562	33.0607		38.2599	38.4905	38.5874
9.68468	30.1202	34.4161	32.776		38.0557	38.3104	38.3703
9.72973	29.903	34.2753	32.4916		37.8507	38.1295	38.1525
9.77477	29.6865	34.1335	32.2078		37.645	37.9478	37.934
9.81982	29.4706	33.9909	31.9245		37.4386	37.7654	37.7149
9.86486	29.2553	33.8475	31.6417		37.2315	37.5823	37.495
9.90991	29.0407	33.7033	31.3595		37.0238	37.3985	37.2746
9.95495	28.8267	33.5583	31.0779		36.8154	37.2139	37.0535
10	28.6135	33.4125	30.7969		36.6064	37.0288	36.8319
10.045	28.4009	33.266	30.5166		36.3969	36.8429	36.6097
10.0901	28.189	33.1187	30.237		36.1868	36.6565	36.387
10.1351	27.9778	32.9706	29.9581		35.9761	36.4694	36.1638
10.1802	27.7672	32.8219	29.6799		35.765	36.2818	35.9402
10.2252	27.5575	32.6725	29.4025		35.5534	36.0936	35.7161
10.2703	27.3484	32.5223	29.1259		35.3413	35.9048	35.4915
10.3153	27.14	32.3716	28.8502		35.1287	35.7155	35.2666
10.3604	26.9324	32.2201	28.5753		34.9158	35.5257	35.0413
10.4054	26.7255	32.068	28.3012		34.7024	35.3354	34.8157
10.4505	26.5194	31.9154	28.0281		34.4887	35.1446	34.5898
10.4955	26.314	31.7621	27.7559		34.2746	34.9533	34.3635
10.5405	26.1094	31.6082	27.4847		34.0603	34.7616	34.137
10.5856	25.9056	31.4537	27.2144		33.8456	34.5695	33.9103
10.6306	25.7026	31.2987	26.9451		33.6306	34.377	33.6833
10.6757	25.5003	31.1431	26.6768		33.4154	34.1842	33.4562
10.7207	25.2988	30.987	26.4096		33.1999	33.9909	33.2288
10.7658	25.0981	30.8304	26.1435		32.9842	33.7973	33.0014
10.8108	24.8982	30.6733	25.8784		32.7684	33.6034	32.7738
10.8559	24.6992	30.5158	25.6145		32.5523	33.4092	32.5461
10.9009	24.5009	30.3577	25.3517		32.3361	33.2146	32.3183
10.9459	24.3035	30.1992	25.09		32.1198	33.0198	32.0905
10.991	24.1069	30.0403	24.8295		31.9034	32.8248	31.8627
11.036	23.9111	29.881	24.5702		31.687	32.6295	31.6349
11.0811	23.7162	29.7213	24.3121		31.4704	32.434	31.4071
11.1261	23.5221	29.5611	24.0553		31.2538	32.2383	31.1793
11.1712	23.3289	29.4007	23.7997		31.0372	32.0424	30.9516
11.2162	23.1365	29.2398	23.5453		30.8206	31.8464	30.724
11.2613	22.945	29.0786	23.2923		30.6041	31.6502	30.4965
11.3063	22.7543	28.9171	23.0405		30.3875	31.4539	30.2692
11.3514	22.5645	28.7553	22.7901		30.1711	31.2574	30.042
11.3964	22.3756	28.5932	22.541		29.9547	31.0609	29.815
11.4414	22.1876	28.4308	22.2932		29.7385	30.8643	29.5881
11.4865	22.0004	28.2681	22.0468		29.5223	30.6676	29.3616
11.5315	21.8142	28.1053	21.8018		29.3064	30.4709	29.1352
11.5766	21.6288	27.9421	21.5582		29.0905	30.2742	28.9091
11.6216	21.4443	27.7788	21.316		28.8749	30.0774	28.6833
11.6667	21.2608	27.6152	21.0752		28.6595	29.8807	28.4578
11.7117	21.0781	27.4515	20.8358		28.4443	29.6839	28.2327
11.7568	20.8963	27.2876	20.598		28.2294	29.4873	28.0079
11.8018	20.7155	27.1235	20.3615		28.0147	29.2906	27.7834
11.8468	20.5356	26.9593	20.1266		27.8003	29.0941	27.5594
11.8919	20.3565	26.7949	19.8931		27.5862	28.8976	27.3357
11.9369	20.1785	26.6305	19.6611		27.3724	28.7013	27.1125
11.982	20.0013	26.4659	19.4307		27.1589	28.5051	26.8897
12.027	19.825	26.3013	19.2017		26.9459	28.309	26.6674
12.0721	19.6497	26.1365	18.9743		26.7332	28.113	26.4456
12.1171	19.4754	25.9718	18.7484		26.5208	27.9173	26.2243
12.1622	19.3019	25.8069	18.5241		26.3089	27.7217	26.0035
12.2072	19.1294	25.6421	18.3013		26.0974	27.5263	25.7832
12.2523	18.9579	25.4772	18.0801		25.8864	27.3311	25.5635
12.2973	18.7873	25.3124	17.8605		25.6758	27.1362	25.3444
12.3423	18.6176	25.1475	17.6424		25.4657	26.9415	25.1259
12.3874	18.4489	24.9827	17.426		25.2561	26.747	24.908
12.4324	18.2811	24.8179	17.2111		25.047	26.5528	24.6907
12.4775	18.1143	24.6532	16.9978		24.8384	26.359	24.474
12.5225	17.9484	24.4885	16.7862		24.6304	26.1654	24.258
12.5676	17.7835	24.3239	16.5761		24.4229	25.9721	24.0427
12.6126	17.6196	24.1594	16.3677		24.216	25.7792	23.8281
12.6577	17.4566	23.995	16.1609		24.0097	25.5866	23.6142
12.7027	17.2945	23.8308	15.9558		23.804	25.3944	23.401
12.7477	17.1335	23.6666	15.7522		23.5989	25.2025	23.1885
12.7928	16.9734	23.5026	15.5504		23.3944	25.011	22.9768
12.8378	16.8142	23.3388	15.3501		23.1906	24.82	22.7659
12.8829	16.656	23.1751	15.1515		22.9874	24.6293	22.5557
12.9279	16.4988	23.0117	14.9545		22.7849	24.4391	22.3464
12.973	16.3426	22.8484	14.7592		22.5831	24.2493	22.1378
13.018	16.1873	22.6853	14.5656		22.382	24.0599	21.9301
13.0631	16.033	22.5224	14.3736		22.1816	23.871	21.7232
13.1081	15.8797	22.3598	14.1833		21.982	23.6826	21.5172
13.1532	15.7273	22.1974	13.9946		21.783	23.4947	21.312
13.1982	15.5759	22.0353	13.8076		21.5849	23.3073	21.1077
13.2432	15.4255	21.8734	13.6222		21.3875	23.1204	20.9043
13.2883	15.276	21.7119	13.4385		21.1908	22.934	20.7018
13.3333	15.1275	21.5506	13.2565		20.995	22.7481	20.5002
13.3784	14.98	21.3896	13.0761		20.8	22.5628	20.2996
13.4234	14.8334	21.2289	12.8974		20.6057	22.3781	20.0999
13.4685	14.6878	21.0685	12.7204		20.4123	22.1939	19.9011
13.5135	14.5432	20.9085	12.545		20.2198	22.0103	19.7032
13.5586	14.3995	20.7489	12.3712		20.028	21.8273	19.5064
13.6036	14.2569	20.5895	12.1991		19.8372	21.6449	19.3105
13.6486	14.1151	20.4306	12.0287		19.6472	21.4631	19.1156
13.6937	13.9744	20.272	11.8599		19.458	21.2819	18.9217
13.7387	13.8346	20.1138	11.6928		19.2698	21.1013	18.7288
13.7838	13.6958	19.956	11.5273		19.0824	20.9214	18.537
13.8288	13.5579	19.7987	11.3635		18.896	20.7422	18.3461
13.8739	13.421	19.6417	11.2013		18.7104	20.5636	18.1563
13.9189	13.2851	19.4851	11.0407		18.5258	20.3857	17.9676
13.964	13.1501	19.329	10.8818		18.3422	20.2084	17.7799
14.009	13.0161	19.1734	10.7244		18.1594	20.0319	17.5932
14.0541	12.8831	19.0182	10.5688		17.9776	19.856	17.4077
14.0991	12.751	18.8635	10.4147		17.7968	19.6809	17.2232
14.1441	12.6198	18.7092	10.2622		17.6169	19.5064	17.0397
14.1892	12.4896	18.5554	10.1114		17.438	19.3327	16.8574
14.2342	12.3604	18.4022	9.96215		17.2601	19.1597	16.6762
14.2793	12.2321	18.2494	9.81451		17.0831	18.9875	16.4961
14.3243	12.1048	18.0971	9.66846		16.9072	18.816	16.3171
14.3694	11.9784	17.9453	9.524		16.7323	18.6453	16.1392
14.4144	11.8529	17.7941	9.38111		16.5583	18.4753	15.9624
14.4595	11.7284	17.6434	9.23981		16.3854	18.3061	15.7867
14.5045	11.6049	17.4933	9.10007		16.2135	18.1377	15.6122
14.5495	11.4822	17.3437	8.96189		16.0426	17.97	15.4389
14.5946	11.3605	17.1946	8.82527		15.8727	17.8032	15.2666
14.6396	11.2398	17.0462	8.69019		15.7039	17.6371	15.0956
14.6847	11.12	16.8983	8.55666		15.5362	17.4719	14.9256
14.7297	11.0011	16.7509	8.42466		15.3694	17.3075	14.7569
14.7748	10.8831	16.6042	8.29418		15.2038	17.1439	14.5893
14.8198	10.766	16.4581	8.16522		15.0391	16.9811	14.4228
14.8649	10.6499	16.3125	8.03778		14.8756	16.8191	14.2575
14.9099	10.5347	16.1676	7.91183		14.7131	16.658	14.0934
14.955	10.4204	16.0233	7.78738		14.5516	16.4977	13.9305
15	10.3071	15.8796	7.66441		14.3913	16.3383	13.7688
15.045	10.1946	15.7366	7.54293		14.232	16.1797	13.6082
15.0901	10.083	15.5941	7.42291		14.0738	16.022	13.4488
15.1351	9.97238	15.4524	7.30435		13.9167	15.8651	13.2907
15.1802	9.86263	15.3112	7.18724		13.7607	15.7091	13.1337
15.2252	9.75378	15.1707	7.07157		13.6057	15.554	12.9778
15.2703	9.64583	15.0309	6.95734		13.4519	15.3997	12.8232
15.3153	9.53877	14.8918	6.84453		13.2991	15.2464	12.6698
15.3604	9.4326	14.7533	6.73313		13.1475	15.0939	12.5176
15.4054	9.32731	14.6154	6.62314		12.9969	14.9423	12.3665
15.4505	9.22291	14.4783	6.51455		12.8474	14.7916	12.2167
15.4955	9.11939	14.3419	6.40734		12.6991	14.6418	12.0681
15.5405	9.01675	14.2061	6.30151		12.5518	14.4929	11.9206
15.5856	8.91497	14.071	6.19704		12.4057	14.3449	11.7744
15.6306	8.81407	13.9367	6.09393		12.2606	14.1978	11.6293
15.6757	8.71404	13.803	5.99217		12.1167	14.0516	11.4855
15.7207	8.61486	13.6701	5.89174		11.9739	13.9064	11.3428
15.7658	8.51655	13.5378	5.79264		11.8321	13.762	11.2014
15.8108	8.41909	13.4063	5.69486		11.6915	13.6186	11.0612
15.8559	8.32248	13.2755	5.59838		11.552	13.4761	10.9221
15.9009	8.22672	13.1454	5.5032		11.4136	13.3345	10.7842
15.9459	8.13181	13.0161	5.40931		11.2764	13.1938	10.6476
15.991	8.03774	12.8875	5.31668		11.1402	13.0541	10.5121
16.036	7.9445	12.7596	5.22533		11.0051	12.9153	10.3778
16.0811	7.85209	12.6325	5.13522		10.8712	12.7774	10.2448
16.1261	7.76052	12.5061	5.04636		10.7384	12.6405	10.1129
16.1712	7.66977	12.3804	4.95873		10.6066	12.5045	9.98217
16.2162	7.57984	12.2555	4.87233		10.476	12.3694	9.85265
16.2613	7.49073	12.1313	4.78713		10.3465	12.2353	9.72431
16.3063	7.40243	12.008	4.70313		10.2181	12.1021	9.59715
16.3514	7.31494	11.8853	4.62033		10.0908	11.9699	9.47117
16.3964	7.22826	11.7634	4.5387		9.96456	11.8386	9.34637
16.4414	7.14238	11.6423	4.45824		9.83946	11.7082	9.22274
16.4865	7.05729	11.522	4.37894		9.71545	11.5788	9.10028
16.5315	6.973	11.4024	4.30078		9.59255	11.4503	8.97898
16.5766	6.8895	11.2835	4.22375		9.47073	11.3228	8.85885
16.6216	6.80678	11.1655	4.14786		9.35001	11.1962	8.73988
16.6667	6.72484	11.0482	4.07307		9.23038	11.0706	8.62207
16.7117	6.64367	10.9317	3.99939		9.11184	10.9459	8.50541
16.7568	6.56328	10.816	3.92679		8.99438	10.8221	8.38989
16.8018	6.48366	10.701	3.85528		8.87801	10.6993	8.27553
16.8468	6.4048	10.5869	3.78484		8.76272	10.5775	8.1623
16.8919	6.3267	10.4735	3.71545		8.6485	10.4565	8.05021
16.9369	6.24935	10.3608	3.64712		8.53536	10.3366	7.93926
16.982	6.17275	10.249	3.57982		8.42329	10.2175	7.82943
17.027	6.0969	10.138	3.51354		8.31229	10.0994	7.72073
17.0721	6.02179	10.0277	3.44828		8.20236	9.98226	7.61315
17.1171	5.94742	9.91819	3.38402		8.09348	9.86604	7.50668
17.1622	5.87378	9.80949	3.32076		7.98566	9.75077	7.40132
17.2072	5.80087	9.70157	3.25848		7.8789	9.63642	7.29707
17.2523	5.72868	9.59444	3.19717		7.77318	9.52302	7.19392
17.2973	5.65721	9.48809	3.13682		7.66851	9.41054	7.09186
17.3423	5.58646	9.38253	3.07742		7.56489	9.299	6.99089
17.3874	5.51642	9.27775	3.01896		7.4623	9.1884	6.89101
17.4324	5.44708	9.17376	2.96142		7.36074	9.07872	6.79221
17.4775	5.37844	9.07055	2.90481		7.26022	8.96997	6.69448
17.5225	5.3105	8.96813	2.8491		7.16072	8.86214	6.59782
17.5676	5.24326	8.86649	2.79429		7.06224	8.75524	6.50223
17.6126	5.1767	8.76564	2.74036		6.96478	8.64926	6.40769
17.6577	5.11082	8.66557	2.68731		6.86833	8.5442	6.3142
17.7027	5.04562	8.56628	2.63512		6.77288	8.44005	6.22176
17.7477	4.9811	8.46778	2.58379		6.67844	8.33682	6.13035
17.7928	4.91724	8.37006	2.5333		6.58499	8.2345	6.03999
17.8378	4.85405	8.27312	2.48365		6.49254	8.1331	5.95064
17.8829	4.79152	8.17696	2.43481		6.40108	8.0326	5.86232
17.9279	4.72965	8.08158	2.3868		6.31059	7.933	5.77502
17.973	4.66843	7.98697	2.33958		6.22109	7.8343	5.68873
18.018	4.60785	7.89315	2.29316		6.13255	7.73651	5.60343
18.0631	4.54792	7.80009	2.24752		6.04498	7.63961	5.51914
18.1081	4.48862	7.70781	2.20265		5.95838	7.5436	5.43583
18.1532	4.42996	7.61631	2.15855		5.87273	7.44848	5.35351
18.1982	4.37192	7.52557	2.1152		5.78803	7.35425	5.27216
18.2432	4.31451	7.43561	2.07259		5.70427	7.2609	5.19179
18.2883	4.25772	7.34641	2.03071		5.62145	7.16844	5.11238
18.3333	4.20154	7.25797	1.98956		5.53957	7.07684	5.03392
18.3784	4.14597	7.17031	1.94912		5.45861	6.98613	4.95642
18.4234	4.09101	7.0834	1.90939		5.37858	6.89628	4.87986
18.4685	4.03665	6.99725	1.87035		5.29946	6.80729	4.80424
18.5135	3.98289	6.91186	1.832		5.22125	6.71917	4.72954
18.5586	3.92971	6.82723	1.79432		5.14395	6.63191	4.65577
18.6036	3.87713	6.74335	1.75731		5.06755	6.5455	4.58292
18.6486	3.82512	6.66022	1.72096		4.99203	6.45994	4.51097
18.6937	3.7737	6.57784	1.68525		4.91741	6.37524	4.43993
18.7387	3.72284	6.49621	1.65019		4.84366	6.29137	4.36978
18.7838	3.67256	6.41532	1.61575		4.77079	6.20834	4.30052
18.8288	3.62284	6.33517	1.58194		4.69879	6.12615	4.23214
18.8739	3.57368	6.25576	1.54874		4.62765	6.04479	4.16464
18.9189	3.52508	6.17709	1.51614		4.55736	5.96425	4.098
18.964	3.47703	6.09915	1.48414		4.48793	5.88454	4.03223
19.009	3.42952	6.02194	1.45272		4.41934	5.80565	3.9673
19.0541	3.38256	5.94546	1.42188		4.35158	5.72757	3.90322
19.0991	3.33613	5.86971	1.39161		4.28466	5.6503	3.83998
19.1441	3.29024	5.79468	1.3619		4.21856	5.57383	3.77757
19.1892	3.24488	5.72036	1.33274		4.15328	5.49817	3.71599
19.2342	3.20004	5.64677	1.30412		4.08881	5.4233	3.65522
19.2793	3.15571	5.57388	1.27605		4.02514	5.34923	3.59526
19.3243	3.11191	5.50171	1.24849		3.96228	5.27594	3.53611
19.3694	3.06861	5.43024	1.22146		3.9002	5.20343	3.47775
19.4144	3.02583	5.35948	1.19494		3.83892	5.13171	3.42018
19.4595	2.98354	5.28942	1.16893		3.77841	5.06075	3.36338
19.5045	2.94175	5.22005	1.14341		3.71868	4.99057	3.30737
19.5495	2.90046	5.15138	1.11838		3.65971	4.92115	3.25212
19.5946	2.85965	5.0834	1.09383		3.6015	4.85248	3.19763
19.6396	2.81933	5.0161	1.06975		3.54405	4.78458	3.14389
19.6847	2.77949	4.94949	1.04614		3.48734	4.71742	3.09089
19.7297	2.74013	4.88356	1.02298		3.43138	4.651	3.03864
19.7748	2.70124	4.8183	1.00028		3.37614	4.58533	2.98711
19.8198	2.66281	4.75372	0.97802		3.32164	4.52039	2.93631
19.8649	2.62485	4.68981	0.956197		3.26786	4.45618	2.88622
19.9099	2.58735	4.62656	0.934804		3.21479	4.3927	2.83685
19.955	2.55031	4.56397	0.913833		3.16243	4.32994	2.78817
20	2.51371	4.50204	0.893277		3.11077	4.26789	2.74019
20.045	2.47756	4.44077	0.87313		3.05981	4.20655	2.6929
20.0901	2.44186	4.38014	0.853385		3.00954	4.14592	2.64629
20.1351	2.40659	4.32016	0.834035		2.95995	4.08599	2.60035
20.1802	2.37175	4.26083	0.815073		2.91103	4.02675	2.55508
20.2252	2.33735	4.20213	0.796494		2.86279	3.9682	2.51047
20.2703	2.30337	4.14407	0.77829		2.8152	3.91034	2.46651
20.3153	2.26982	4.08664	0.760455		2.76828	3.85316	2.4232
20.3604	2.23668	4.02984	0.742983		2.722	3.79665	2.38053
20.4054	2.20396	3.97365	0.725868		2.67637	3.74081	2.33848
20.4505	2.17165	3.91809	0.709104		2.63137	3.68564	2.29707
20.4955	2.13974	3.86314	0.692684		2.58701	3.63112	2.25627
20.5405	2.10823	3.80881	0.676603		2.54327	3.57726	2.21608
20.5856	2.07713	3.75508	0.660854		2.50014	3.52405	2.1765
20.6306	2.04641	3.70195	0.645432		2.45763	3.47148	2.13751
20.6757	2.01609	3.64942	0.630332		2.41573	3.41955	2.09912
20.7207	1.98616	3.59749	0.615546		2.37442	3.36826	2.06131
20.7658	1.9566	3.54615	0.601071		2.33371	3.31759	2.02407
20.8108	1.92743	3.49539	0.586899		2.29358	3.26755	1.98741
20.8559	1.89863	3.44521	0.573027		2.25404	3.21812	1.95132
20.9009	1.8702	3.39562	0.559448		2.21507	3.16931	1.91577
20.9459	1.84214	3.34659	0.546157		2.17667	3.1211	1.88079
20.991	1.81444	3.29814	0.533149		2.13882	3.0735	1.84634
21.036	1.7871	3.25025	0.520419		2.10154	3.02649	1.81243
21.0811	1.76012	3.20292	0.507962		2.0648	2.98008	1.77906
21.1261	1.73349	3.15615	0.495772		2.02861	2.93425	1.74621
21.1712	1.70721	3.10993	0.483845		1.99296	2.889	1.71388
21.2162	1.68128	3.06426	0.472176		1.95784	2.84434	1.68206
21.2613	1.65568	3.01914	0.460759		1.92324	2.80024	1.65075
21.3063	1.63043	2.97455	0.449592		1.88916	2.75671	1.61994
21.3514	1.60551	2.9305	0.438668		1.8556	2.71374	1.58962
21.3964	1.58092	2.88698	0.427983		1.82254	2.67133	1.55979
21.4414	1.55665	2.84399	0.417532		1.78999	2.62946	1.53044
21.4865	1.53272	2.80152	0.407312		1.75793	2.58815	1.50157
21.5315	1.5091	2.75957	0.397317		1.72636	2.54737	1.47316
21.5766	1.4858	2.71813	0.387544		1.69528	2.50713	1.44522
21.6216	1.46281	2.67721	0.377988		1.66468	2.46742	1.41774
21.6667	1.44013	2.63678	0.368644		1.63455	2.42824	1.3907
21.7117	1.41776	2.59686	0.35951		1.60488	2.38958	1.36412
21.7568	1.39569	2.55744	0.35058		1.57568	2.35143	1.33797
21.8018	1.37392	2.51851	0.341851		1.54694	2.31379	1.31226
21.8468	1.35245	2.48007	0.333319		1.51864	2.27666	1.28697
21.8919	1.33127	2.44211	0.32498		1.49079	2.24003	1.26211
21.9369	1.31038	2.40464	0.31683		1.46338	2.20389	1.23767
21.982	1.28978	2.36764	0.308865		1.43641	2.16825	1.21363
22.027	1.26947	2.33111	0.301082		1.40986	2.13309	1.19001
22.0721	1.24943	2.29505	0.293478		1.38374	2.09841	1.16678
22.1171	1.22967	2.25945	0.286047		1.35803	2.06421	1.14395
22.1622	1.21019	2.22431	0.278788		1.33274	2.03048	1.1215
22.2072	1.19097	2.18962	0.271696		1.30785	1.99722	1.09944
22.2523	1.17202	2.15539	0.264768		1.28337	1.96441	1.07776
22.2973	1.15334	2.1216	0.258001		1.25929	1.93207	1.05646
22.3423	1.13492	2.08825	0.251391		1.23559	1.90017	1.03552
22.3874	1.11676	2.05534	0.244936		1.21229	1.86872	1.01494
22.4324	1.09886	2.02287	0.238631		1.18936	1.83772	0.994726
22.4775	1.08121	1.99082	0.232475		1.16681	1.80715	0.974861
22.5225	1.0638	1.9592	0.226463		1.14464	1.77701	0.955344
22.5676	1.04665	1.92801	0.220594		1.12283	1.74731	0.93617
22.6126	1.02974	1.89723	0.214863		1.10138	1.71802	0.917334
22.6577	1.01307	1.86686	0.209268		1.08029	1.68916	0.89883
22.7027	0.996637	1.8369	0.203807		1.05956	1.66071	0.880655
22.7477	0.980441	1.80735	0.198476		1.03917	1.63267	0.862804
22.7928	0.964477	1.77819	0.193272		1.01912	1.60503	0.845271
22.8378	0.948743	1.74944	0.188193		0.999412	1.5778	0.828052
22.8829	0.933237	1.72107	0.183236		0.980037	1.55096	0.811142
22.9279	0.917955	1.6931	0.178399		0.960991	1.52451	0.794536
22.973	0.902895	1.66551	0.173679		0.942269	1.49845	0.778231
23.018	0.888053	1.6383	0.169073		0.923867	1.47278	0.762222
23.0631	0.873428	1.61147	0.16458		0.905781	1.44748	0.746504
23.1081	0.859016	1.58501	0.160196		0.888006	1.42255	0.731072
23.1532	0.844816	1.55892	0.155919		0.870537	1.398	0.715923
23.1982	0.830824	1.5332	0.151747		0.853371	1.37381	0.701052
23.2432	0.817038	1.50784	0.147677		0.836502	1.34998	0.686454
23.2883	0.803455	1.48283	0.143708		0.819927	1.32651	0.672126
23.3333	0.790073	1.45818	0.139837		0.803641	1.30339	0.658064
23.3784	0.77689	1.43388	0.136062		0.787641	1.28062	0.644263
23.4234	0.763902	1.40992	0.13238		0.771922	1.25819	0.630719
23.4685	0.751107	1.3863	0.12879		0.756479	1.23611	0.617428
23.5135	0.738504	1.36303	0.12529		0.74131	1.21436	0.604386
23.5586	0.726088	1.34009	0.121878		0.72641	1.19294	0.591589
23.6036	0.713859	1.31748	0.118551		0.711774	1.17185	0.579034
23.6486	0.701814	1.29519	0.115308		0.6974	1.15108	0.566716
23.6937	0.68995	1.27323	0.112146		0.683282	1.13064	0.554632
23.7387	0.678266	1.25159	0.109065		0.669418	1.11051	0.542778
23.7838	0.666758	1.23027	0.106062		0.655804	1.09069	0.53115
23.8288	0.655424	1.20926	0.103135		0.642435	1.07118	0.519744
23.8739	0.644263	1.18856	0.100282		0.629308	1.05197	0.508558
23.9189	0.633272	1.16816	0.0975028		0.616419	1.03307	0.497586
23.964	0.622448	1.14807	0.0947946		0.603765	1.01446	0.486827
24.009	0.611791	1.12827	0.0921559		0.591342	0.99614	0.476276
24.0541	0.601296	1.10877	0.0895852		0.579147	0.978113	0.465929
24.0991	0.590963	1.08956	0.0870807		0.567175	0.960371	0.455784
24.1441	0.580789	1.07063	0.0846411		0.555424	0.942911	0.445837
24.1892	0.570773	1.052	0.0822648		0.543891	0.925729	0.436085
24.2342	0.560911	1.03364	0.0799503		0.53257	0.908821	0.426525
24.2793	0.551202	1.01556	0.0776961		0.52146	0.892185	0.417152
24.3243	0.541644	0.997757	0.0755008		0.510557	0.875815	0.407965
24.3694	0.532235	0.980223	0.073363		0.499858	0.85971	0.39896
24.4144	0.522973	0.962957	0.0712814		0.489359	0.843864	0.390133
24.4595	0.513856	0.945956	0.0692545		0.479058	0.828276	0.381482
24.5045	0.504882	0.929216	0.0672812		0.46895	0.81294	0.373004
24.5495	0.496048	0.912734	0.0653601		0.459034	0.797855	0.364696
24.5946	0.487354	0.896507	0.0634899		0.449305	0.783017	0.356555
24.6396	0.478797	0.880531	0.0616694		0.439761	0.768421	0.348577
24.6847	0.470376	0.864803	0.0598974		0.430399	0.754066	0.34076
24.7297	0.462088	0.849321	0.0581728		0.421216	0.739947	0.333102
24.7748	0.453931	0.834081	0.0564943		0.412209	0.726062	0.325599
24.8198	0.445905	0.819081	0.0548609		0.403375	0.712407	0.318249
24.8649	0.438006	0.804316	0.0532715		0.394711	0.698979	0.311049
24.9099	0.430234	0.789784	0.0517249		0.386214	0.685775	0.303996
24.955	0.422587	0.775483	0.0502201		0.377882	0.672792	0.297088
25	0.415062	0.761408	0.0487561		0.369712	0.660026	0.290322
25.045	0.407658	0.747558	0.0473318		0.361701	0.647476	0.283696
25.0901	0.400374	0.733928	0.0459464		0.353846	0.635136	0.277207
25.1351	0.393207	0.720517	0.0445987		0.346145	0.623006	0.270852
25.1802	0.386157	0.707322	0.0432879		0.338595	0.611081	0.264629
25.2252	0.37922	0.694338	0.042013		0.331194	0.599359	0.258537
25.2703	0.372397	0.681565	0.0407732		0.323939	0.587837	0.252571
25.3153	0.365685	0.668999	0.0395675		0.316827	0.576511	0.246731
25.3604	0.359082	0.656636	0.0383952		0.309857	0.56538	0.241013
25.4054	0.352588	0.644476	0.0372552		0.303025	0.554441	0.235416
25.4505	0.3462	0.632513	0.0361469		0.296329	0.543689	0.229936
25.4955	0.339917	0.620747	0.0350694		0.289767	0.533124	0.224573
25.5405	0.333737	0.609175	0.0340219		0.283337	0.522741	0.219324
25.5856	0.32766	0.597792	0.0330037		0.277036	0.512539	0.214187
25.6306	0.321683	0.586598	0.0320139		0.270862	0.502515	0.209159
25.6757	0.315805	0.57559	0.031052		0.264813	0.492666	0.204239
25.7207	0.310024	0.564764	0.0301171		0.258886	0.482989	0.199424
25.7658	0.30434	0.554119	0.0292085		0.253079	0.473483	0.194713
25.8108	0.29875	0.543651	0.0283256		0.247391	0.464143	0.190103
25.8559	0.293254	0.533359	0.0274677		0.241819	0.454969	0.185593
25.9009	0.28785	0.52324	0.0266342		0.236361	0.445957	0.181181
25.9459	0.282536	0.513292	0.0258243		0.231015	0.437104	0.176865
25.991	0.277312	0.503511	0.0250376		0.225779	0.42841	0.172642
26.036	0.272176	0.493896	0.0242733		0.220651	0.41987	0.168512
26.0811	0.267127	0.484444	0.0235309		0.215629	0.411483	0.164472
26.1261	0.262162	0.475154	0.0228098		0.210711	0.403246	0.160521
26.1712	0.257282	0.466021	0.0221094		0.205895	0.395158	0.156657
26.2162	0.252485	0.457046	0.0214292		0.201179	0.387215	0.152878
26.2613	0.247769	0.448224	0.0207687		0.196562	0.379416	0.149182
26.3063	0.243134	0.439554	0.0201273		0.192042	0.371758	0.145569
26.3514	0.238578	0.431034	0.0195044		0.187616	0.364239	0.142035
26.3964	0.2341	0.422661	0.0188997		0.183284	0.356857	0.138581
26.4414	0.229699	0.414434	0.0183127		0.179042	0.34961	0.135203
26.4865	0.225373	0.406349	0.0177427		0.174891	0.342495	0.131901
26.5315	0.221122	0.398406	0.0171895		0.170827	0.335511	0.128673
26.5766	0.216944	0.390601	0.0166524		0.16685	0.328655	0.125518
26.6216	0.212838	0.382934	0.0161312		0.162957	0.321926	0.122433
26.6667	0.208804	0.375401	0.0156253		0.159148	0.315321	0.119419
26.7117	0.204839	0.368001	0.0151344		0.15542	0.308839	0.116472
26.7568	0.200943	0.360731	0.0146579		0.151772	0.302476	0.113593
26.8018	0.197115	0.353591	0.0141956		0.148202	0.296233	0.110779
26.8468	0.193354	0.346577	0.013747		0.14471	0.290105	0.108029
26.8919	0.189659	0.339688	0.0133118		0.141293	0.284093	0.105342
26.9369	0.186028	0.332922	0.0128896		0.137949	0.278193	0.102717
26.982	0.182462	0.326277	0.01248		0.134679	0.272404	0.100152
27.027	0.178958	0.319752	0.0120826		0.131479	0.266725	0.097646
27.0721	0.175515	0.313343	0.0116972		0.12835	0.261152	0.0951979
27.1171	0.172134	0.307051	0.0113234		0.125288	0.255685	0.0928064
27.1622	0.168812	0.300872	0.0109609		0.122294	0.250322	0.0904703
27.2072	0.165549	0.294805	0.0106093		0.119366	0.245061	0.0881886
27.2523	0.162344	0.288848	0.0102683		0.116502	0.239901	0.0859599
27.2973	0.159196	0.283	0.00993774		0.113701	0.234839	0.0837834
27.3423	0.156104	0.277258	0.0096172		0.110962	0.229874	0.0816577
27.3874	0.153067	0.271622	0.00930642		0.108284	0.225004	0.0795819
27.4324	0.150085	0.266089	0.00900513		0.105665	0.220228	0.077555
27.4775	0.147156	0.260658	0.00871306		0.103105	0.215545	0.0755757
27.5225	0.14428	0.255327	0.00842994		0.100602	0.210952	0.0736432
27.5676	0.141455	0.250094	0.00815552		0.0981548	0.206448	0.0717565
27.6126	0.138681	0.244959	0.00788954		0.0957626	0.202032	0.0699145
27.6577	0.135958	0.239919	0.00763177		0.0934241	0.197702	0.0681163
27.7027	0.133283	0.234972	0.00738197		0.0911383	0.193456	0.066361
27.7477	0.130657	0.230118	0.00713991		0.0889041	0.189294	0.0646476
27.7928	0.128079	0.225355	0.00690535		0.0867205	0.185213	0.0629752
27.8378	0.125548	0.220682	0.0066781		0.0845864	0.181212	0.061343
27.8829	0.123063	0.216096	0.00645792		0.0825008	0.17729	0.0597499
27.9279	0.120623	0.211596	0.00624462		0.0804627	0.173446	0.0581953
27.973	0.118228	0.207182	0.00603799		0.0784712	0.169678	0.0566783
28.018	0.115877	0.202851	0.00583784		0.0765252	0.165985	0.0551979
28.0631	0.113569	0.198602	0.00564397		0.0746239	0.162365	0.0537535
28.1081	0.111303	0.194434	0.00545621		0.0727663	0.158817	0.0523442
28.1532	0.109079	0.190346	0.00527437		0.0709514	0.155341	0.0509692
28.1982	0.106896	0.186336	0.00509828		0.0691785	0.151934	0.0496278
28.2432	0.104754	0.182402	0.00492776		0.0674466	0.148595	0.0483192
28.2883	0.102651	0.178544	0.00476265		0.0657549	0.145324	0.0470428
28.3333	0.100587	0.174761	0.00460279		0.0641025	0.142118	0.0457977
28.3784	0.0985618	0.17105	0.00444802		0.0624886	0.138977	0.0445833
28.4234	0.0965741	0.167411	0.00429819		0.0609123	0.1359	0.0433988
28.4685	0.0946236	0.163843	0.00415316		0.059373	0.132886	0.0422437
28.5135	0.0927095	0.160344	0.00401277		0.0578697	0.129932	0.0411172
28.5586	0.0908312	0.156914	0.00387688		0.0564018	0.127039	0.0400187
28.6036	0.0889882	0.15355	0.00374537		0.0549684	0.124205	0.0389476
28.6486	0.0871798	0.150252	0.0036181		0.0535688	0.12143	0.0379032
28.6937	0.0854054	0.147018	0.00349493		0.0522024	0.118711	0.0368849
28.7387	0.0836645	0.143849	0.00337575		0.0508683	0.116048	0.0358921
28.7838	0.0819565	0.140741	0.00326044		0.049566	0.11344	0.0349243
28.8288	0.0802809	0.137695	0.00314887		0.0482946	0.110886	0.0339808
28.8739	0.078637	0.134709	0.00304093		0.0470535	0.108384	0.0330611
28.9189	0.0770243	0.131783	0.00293651		0.0458421	0.105935	0.0321647
28.964	0.0754423	0.128915	0.0028355		0.0446598	0.103537	0.0312909
29.009	0.0738905	0.126103	0.00273779		0.0435058	0.101188	0.0304394
29.0541	0.0723683	0.123348	0.00264329		0.0423796	0.0988891	0.0296095
29.0991	0.0708752	0.120648	0.0025519		0.0412805	0.0966379	0.0288007
29.1441	0.0694107	0.118003	0.00246351		0.040208	0.094434	0.0280127
29.1892	0.0679743	0.11541	0.00237804		0.0391614	0.0922763	0.0272447
29.2342	0.0665656	0.11287	0.00229539		0.0381403	0.0901642	0.0264965
29.2793	0.065184	0.110381	0.00221548		0.0371439	0.0880966	0.0257675
29.3243	0.063829	0.107942	0.00213822		0.0361718	0.0860728	0.0250573
29.3694	0.0625002	0.105553	0.00206352		0.0352235	0.0840919	0.0243654
29.4144	0.0611972	0.103212	0.00199132		0.0342984	0.0821531	0.0236914
29.4595	0.0599194	0.100919	0.00192152		0.0333959	0.0802556	0.0230349
29.5045	0.0586664	0.0986727	0.00185405		0.0325156	0.0783986	0.0223954
29.5495	0.0574378	0.0964725	0.00178884		0.031657	0.0765813	0.0217726
29.5946	0.0562332	0.0943173	0.00172582		0.0308195	0.0748029	0.021166
29.6396	0.0550521	0.0922064	0.00166492		0.0300027	0.0730627	0.0205752
29.6847	0.0538941	0.090139	0.00160607		0.0292062	0.07136	0.0199999
29.7297	0.0527588	0.0881142	0.0015492		0.0284295	0.069694	0.0194397
29.7748	0.0516457	0.0861313	0.00149425		0.027672	0.068064	0.0188942
29.8198	0.0505546	0.0841895	0.00144116		0.0269334	0.0664693	0.0183631
29.8649	0.0494849	0.0822881	0.00138988		0.0262133	0.0649091	0.017846
29.9099	0.0484363	0.0804262	0.00134034		0.0255112	0.0633829	0.0173426
29.955	0.0474085	0.0786031	0.00129248		0.0248267	0.06189	0.0168525
30	0.046401	0.0768182	0.00124625		0.0241593	0.0604296	0.0163755
30.045	0.0454134	0.0750706	0.00120161		0.0235088	0.0590012	0.0159111
30.0901	0.0444455	0.0733597	0.00115849		0.0228747	0.0576041	0.0154591
30.1351	0.0434968	0.0716848	0.00111685		0.0222566	0.0562377	0.0150192
30.1802	0.0425671	0.0700452	0.00107664		0.0216541	0.0549014	0.014591
30.2252	0.0416559	0.0684402	0.00103782		0.021067	0.0535946	0.0141743
30.2703	0.0407629	0.0668692	0.00100033		0.0204947	0.0523166	0.0137688
30.3153	0.0398877	0.0653315	0.00096414		0.0199371	0.0510669	0.0133743
30.3604	0.0390302	0.0638265	0.0009292		0.0193937	0.049845	0.0129904
30.4054	0.0381898	0.0623536	0.000895472		0.0188641	0.0486502	0.0126168
30.4505	0.0373664	0.0609121	0.000862914		0.0183482	0.0474821	0.0122534
30.4955	0.0365596	0.0595014	0.000831489		0.0178454	0.04634	0.0118998
30.5405	0.035769	0.058121	0.000801159		0.0173557	0.0452235	0.0115558
30.5856	0.0349945	0.0567702	0.000771888		0.0168785	0.044132	0.0112212
30.6306	0.0342356	0.0554484	0.000743641		0.0164137	0.043065	0.0108958
30.6757	0.0334922	0.0541552	0.000716383		0.0159608	0.042022	0.0105792
30.7207	0.0327638	0.0528899	0.000690082		0.0155198	0.0410025	0.0102713
30.7658	0.0320503	0.0516521	0.000664705		0.0150901	0.0400061	0.00997188
30.8108	0.0313513	0.050441	0.000640222		0.0146717	0.0390322	0.00968067
30.8559	0.0306665	0.0492563	0.000616604		0.0142642	0.0380804	0.00939748
30.9009	0.0299958	0.0480974	0.000593819		0.0138673	0.0371502	0.00912212
30.9459	0.0293389	0.0469639	0.000571842		0.0134808	0.0362412	0.00885436
30.991	0.0286954	0.0458551	0.000550644		0.0131044	0.035353	0.00859403
31.036	0.0280651	0.0447706	0.000530199		0.012738	0.034485	0.00834093
31.0811	0.0274478	0.0437099	0.000510482		0.0123811	0.033637	0.00809486
31.1261	0.0268433	0.0426725	0.000491468		0.0120337	0.0328084	0.00785565
31.1712	0.0262512	0.0416581	0.000473133		0.0116955	0.0319988	0.00762312
31.2162	0.0256714	0.040666	0.000455454		0.0113662	0.0312079	0.0073971
31.2613	0.0251035	0.0396959	0.000438408		0.0110457	0.0304352	0.00717741
31.3063	0.0245475	0.0387473	0.000421974		0.0107337	0.0296805	0.00696388
31.3514	0.024003	0.0378198	0.000406132		0.01043	0.0289431	0.00675637
31.3964	0.0234699	0.036913	0.00039086		0.0101343	0.028223	0.0065547
31.4414	0.0229478	0.0360264	0.000376139		0.00984663	0.0275195	0.00635873
31.4865	0.0224367	0.0351596	0.000361951		0.00956662	0.0268325	0.0061683
31.5315	0.0219363	0.0343122	0.000348276		0.00929412	0.0261615	0.00598326
31.5766	0.0214463	0.0334839	0.000335097		0.00902895	0.0255062	0.00580349
31.6216	0.0209666	0.0326741	0.000322397		0.00877091	0.0248662	0.00562882
31.6667	0.020497	0.0318827	0.000310159		0.00851984	0.0242413	0.00545913
31.7117	0.0200373	0.031109	0.000298368		0.00827555	0.023631	0.00529429
31.7568	0.0195873	0.0303529	0.000287007		0.00803788	0.0230352	0.00513416
31.8018	0.0191468	0.0296139	0.000276062		0.00780665	0.0224534	0.00497862
31.8468	0.0187156	0.0288917	0.000265517		0.00758171	0.0218854	0.00482754
31.8919	0.0182935	0.028186	0.00025536		0.00736289	0.0213308	0.00468081
31.9369	0.0178804	0.0274963	0.000245576		0.00715004	0.0207894	0.00453831
31.982	0.017476	0.0268224	0.000236153		0.006943	0.0202609	0.00439992
32.027	0.0170803	0.0261639	0.000227077		0.00674164	0.019745	0.00426553
32.0721	0.016693	0.0255204	0.000218336		0.00654579	0.0192414	0.00413504
32.1171	0.0163139	0.0248918	0.000209919		0.00635533	0.0187499	0.00400833
32.1622	0.015943	0.0242776	0.000201814		0.00617011	0.0182701	0.00388531
32.2072	0.01558	0.0236776	0.00019401		0.00598999	0.0178019	0.00376587
32.2523	0.0152248	0.0230915	0.000186496		0.00581485	0.0173449	0.00364991
32.2973	0.0148772	0.0225189	0.000179263		0.00564456	0.0168989	0.00353735
32.3423	0.0145371	0.0219596	0.000172299		0.00547899	0.0164637	0.00342808
32.3874	0.0142043	0.0214133	0.000165596		0.00531802	0.016039	0.00332201
32.4324	0.0138787	0.0208797	0.000159143		0.00516152	0.0156246	0.00321906
32.4775	0.0135601	0.0203586	0.000152933		0.00500939	0.0152203	0.00311915
32.5225	0.0132484	0.0198496	0.000146956		0.00486151	0.0148258	0.00302218
32.5676	0.0129435	0.0193525	0.000141203		0.00471776	0.0144409	0.00292807
32.6126	0.0126452	0.0188671	0.000135668		0.00457804	0.0140654	0.00283675
32.6577	0.0123534	0.0183931	0.000130341		0.00444225	0.0136991	0.00274814
32.7027	0.0120679	0.0179303	0.000125216		0.00431027	0.0133417	0.00266216
32.7477	0.0117887	0.0174783	0.000120286		0.00418201	0.0129931	0.00257874
32.7928	0.0115155	0.0170371	0.000115542		0.00405737	0.0126531	0.0024978
32.8378	0.0112483	0.0166063	0.000110978		0.00393625	0.0123215	0.00241928
32.8829	0.010987	0.0161857	0.000106588		0.00381856	0.0119981	0.00234311
32.9279	0.0107314	0.0157751	0.000102366		0.00370422	0.0116826	0.00226922
32.973	0.0104814	0.0153742	9.83043e-05		0.00359312	0.011375	0.00219755
33.018	0.0102369	0.014983	9.43982e-05		0.00348518	0.0110749	0.00212803
33.0631	0.00999784	0.014601	9.06419e-05		0.00338033	0.0107824	0.00206061
33.1081	0.00976402	0.0142282	8.70296e-05		0.00327847	0.0104971	0.00199522
33.1532	0.00953537	0.0138644	8.35561e-05		0.00317952	0.0102189	0.0019318
33.1982	0.00931177	0.0135093	8.02163e-05		0.00308341	0.0099477	0.00187031
33.2432	0.00909314	0.0131627	7.70053e-05		0.00299006	0.00968327	0.00181068
33.2883	0.00887935	0.0128245	7.39183e-05		0.0028994	0.00942547	0.00175287
33.3333	0.00867032	0.0124944	7.09506e-05		0.00281134	0.00917413	0.00169681
33.3784	0.00846593	0.0121724	6.80979e-05		0.00272583	0.00892912	0.00164246
33.4234	0.00826611	0.0118581	6.53559e-05		0.0026428	0.00869029	0.00158977
33.4685	0.00807074	0.0115515	6.27204e-05		0.00256216	0.00845748	0.00153869
33.5135	0.00787975	0.0112523	6.01875e-05		0.00248387	0.00823056	0.00148918
33.5586	0.00769303	0.0109604	5.77533e-05		0.00240785	0.00800939	0.00144118
33.6036	0.00751049	0.0106756	5.54142e-05		0.00233405	0.00779383	0.00139467
33.6486	0.00733206	0.0103978	5.31665e-05		0.0022624	0.00758374	0.00134958
33.6937	0.00715764	0.0101268	5.10069e-05		0.00219284	0.00737901	0.00130589
33.7387	0.00698715	0.00986248	4.89319e-05		0.00212532	0.0071795	0.00126354
33.7838	0.0068205	0.00960463	4.69385e-05		0.00205977	0.00698508	0.00122251
33.8288	0.00665761	0.00935313	4.50235e-05		0.00199615	0.00679564	0.00118274
33.8739	0.00649841	0.00910783	4.3184e-05		0.00193441	0.00661106	0.00114422
33.9189	0.00634282	0.00886859	4.14171e-05		0.00187448	0.00643122	0.00110689
33.964	0.00619075	0.00863528	3.97201e-05		0.00181632	0.006256	0.00107072
34.009	0.00604214	0.00840775	3.80902e-05		0.00175987	0.0060853	0.00103568
34.0541	0.00589691	0.00818588	3.6525e-05		0.0017051	0.005919	0.00100174
34.0991	0.00575499	0.00796952	3.50219e-05		0.00165196	0.00575701	0.000968862
34.1441	0.00561631	0.00775856	3.35786e-05		0.00160039	0.0055992	0.000937013
34.1892	0.0054808	0.00755286	3.21928e-05		0.00155036	0.0054455	0.000906166
34.2342	0.00534838	0.00735231	3.08623e-05		0.00150182	0.00529578	0.000876289
34.2793	0.005219	0.00715679	2.9585e-05		0.00145472	0.00514997	0.000847354
34.3243	0.00509259	0.00696617	2.83588e-05		0.00140904	0.00500795	0.000819332
34.3694	0.00496908	0.00678035	2.71817e-05		0.00136472	0.00486965	0.000792196
34.4144	0.00484842	0.0065992	2.60519e-05		0.00132174	0.00473496	0.00076592
34.4595	0.00473053	0.00642263	2.49675e-05		0.00128004	0.0046038	0.000740478
34.5045	0.00461537	0.00625052	2.39268e-05		0.0012396	0.00447609	0.000715844
34.5495	0.00450286	0.00608276	2.2928e-05		0.00120038	0.00435173	0.000691994
34.5946	0.00439296	0.00591926	2.19696e-05		0.00116235	0.00423065	0.000668905
34.6396	0.00428561	0.00575992	2.105e-05		0.00112546	0.00411276	0.000646553
34.6847	0.00418075	0.00560462	2.01676e-05		0.0010897	0.00399799	0.000624916
34.7297	0.00407832	0.00545329	1.9321e-05		0.00105501	0.00388625	0.000603972
34.7748	0.00397828	0.00530582	1.85088e-05		0.00102139	0.00377748	0.0005837
34.8198	0.00388057	0.00516212	1.77296e-05		0.000988783	0.00367159	0.000564079
34.8649	0.00378514	0.0050221	1.69822e-05		0.000957173	0.00356852	0.000545091
34.9099	0.00369194	0.00488568	1.62653e-05		0.000926529	0.0034682	0.000526714
34.955	0.00360092	0.00475276	1.55778e-05		0.000896823	0.00337055	0.000508931
35	0.00351203	0.00462326	1.49183e-05		0.000868026	0.00327551	0.000491724
35.045	0.00342523	0.00449711	1.42859e-05		0.000840114	0.00318302	0.000475073
35.0901	0.00334047	0.00437421	1.36795e-05		0.00081306	0.00309301	0.000458964
35.1351	0.0032577	0.00425449	1.3098e-05		0.000786839	0.00300541	0.000443377
35.1802	0.00317688	0.00413788	1.25404e-05		0.000761426	0.00292018	0.000428298
35.2252	0.00309797	0.00402429	1.20059e-05		0.000736798	0.00283723	0.000413711
35.2703	0.00302092	0.00391366	1.14934e-05		0.000712933	0.00275653	0.0003996
35.3153	0.0029457	0.00380591	1.10021e-05		0.000689807	0.00267801	0.000385951
35.3604	0.00287226	0.00370097	1.05312e-05		0.000667398	0.00260162	0.000372749
35.4054	0.00280056	0.00359878	1.00798e-05		0.000645687	0.00252729	0.00035998
35.4505	0.00273057	0.00349925	9.64716e-06		0.000624651	0.00245499	0.00034763
35.4955	0.00266224	0.00340234	9.23252e-06		0.000604271	0.00238465	0.000335687
35.5405	0.00259553	0.00330798	8.83516e-06		0.000584528	0.00231623	0.000324138
35.5856	0.00253042	0.00321609	8.45438e-06		0.000565402	0.00224968	0.00031297
35.6306	0.00246687	0.00312663	8.08951e-06		0.000546876	0.00218494	0.000302172
35.6757	0.00240483	0.00303953	7.73992e-06		0.000528931	0.00212198	0.000291731
35.7207	0.00234428	0.00295473	7.40497e-06		0.00051155	0.00206074	0.000281637
35.7658	0.00228518	0.00287217	7.08409e-06		0.000494716	0.00200119	0.000271877
35.8108	0.0022275	0.00279181	6.77669e-06		0.000478413	0.00194328	0.000262443
35.8559	0.00217121	0.00271358	6.48223e-06		0.000462625	0.00188696	0.000253323
35.9009	0.00211628	0.00263743	6.20019e-06		0.000447336	0.00183219	0.000244507
35.9459	0.00206267	0.00256331	5.93005e-06		0.000432531	0.00177894	0.000235987
35.991	0.00201035	0.00249117	5.67133e-06		0.000418196	0.00172717	0.000227751
36.036	0.0019593	0.00242096	5.42357e-06		0.000404316	0.00167682	0.000219792
36.0811	0.00190948	0.00235263	5.18631e-06		0.000390878	0.00162788	0.0002121
36.1261	0.00186087	0.00228613	4.95912e-06		0.000377869	0.0015803	0.000204666
36.1712	0.00181345	0.00222142	4.74159e-06		0.000365274	0.00153404	0.000197483
36.2162	0.00176717	0.00215845	4.53333e-06		0.000353083	0.00148908	0.000190543
36.2613	0.00172202	0.00209718	4.33395e-06		0.000341281	0.00144537	0.000183836
36.3063	0.00167797	0.00203756	4.14308e-06		0.000329858	0.00140288	0.000177357
36.3514	0.001635	0.00197955	3.96037e-06		0.000318802	0.00136159	0.000171098
36.3964	0.00159308	0.00192311	3.78549e-06		0.000308102	0.00132145	0.000165051
36.4414	0.00155218	0.00186821	3.61811e-06		0.000297746	0.00128245	0.000159209
36.4865	0.00151228	0.00181479	3.45791e-06		0.000287724	0.00124454	0.000153567
36.5315	0.00147337	0.00176283	3.30461e-06		0.000278026	0.0012077	0.000148116
36.5766	0.00143541	0.00171228	3.1579e-06		0.000268642	0.0011719	0.000142852
36.6216	0.00139838	0.00166312	3.01753e-06		0.000259562	0.00113711	0.000137768
36.6667	0.00136226	0.0016153	2.88321e-06		0.000250777	0.00110331	0.000132858
36.7117	0.00132704	0.00156878	2.75471e-06		0.000242278	0.00107047	0.000128117
36.7568	0.00129269	0.00152355	2.63177e-06		0.000234055	0.00103856	0.000123538
36.8018	0.00125918	0.00147955	2.51416e-06		0.0002261	0.00100756	0.000119117
36.8468	0.00122651	0.00143677	2.40166e-06		0.000218405	0.000977447	0.000114849
36.8919	0.00119464	0.00139516	2.29406e-06		0.000210962	0.000948191	0.000110727
36.9369	0.00116357	0.0013547	2.19113e-06		0.000203762	0.000919771	0.000106748
36.982	0.00113326	0.00131536	2.0927e-06		0.000196799	0.000892166	0.000102907
37.027	0.00110372	0.00127711	1.99857e-06		0.000190064	0.000865352	9.91988e-05
37.0721	0.00107491	0.00123992	1.90855e-06		0.000183551	0.000839308	9.56194e-05
37.1171	0.00104681	0.00120376	1.82248e-06		0.000177252	0.000814013	9.21645e-05
37.1622	0.00101942	0.00116861	1.74018e-06		0.000171161	0.000789447	8.88298e-05
37.2072	0.000992718	0.00113444	1.66149e-06		0.000165272	0.00076559	8.56115e-05
37.2523	0.000966682	0.00110122	1.58627e-06		0.000159577	0.000742422	8.25055e-05
37.2973	0.000941299	0.00106893	1.51436e-06		0.000154072	0.000719925	7.95081e-05
37.3423	0.000916553	0.00103754	1.44561e-06		0.000148749	0.00069808	7.66157e-05
37.3874	0.00089243	0.00100703	1.37991e-06		0.000143602	0.000676869	7.38247e-05
37.4324	0.000868914	0.000977373	1.31711e-06		0.000138628	0.000656274	7.11318e-05
37.4775	0.000845991	0.000948553	1.25709e-06		0.000133819	0.000636279	6.85336e-05
37.5225	0.000823647	0.000920545	1.19973e-06		0.00012917	0.000616867	6.60269e-05
37.5676	0.000801867	0.000893325	1.14492e-06		0.000124677	0.000598022	6.36087e-05
37.6126	0.000780639	0.000866875	1.09254e-06		0.000120335	0.000579727	6.12758e-05
37.6577	0.000759948	0.000841172	1.0425e-06		0.000116138	0.000561969	5.90256e-05
37.7027	0.000739783	0.000816197	9.94686e-07		0.000112082	0.000544731	5.6855e-05
37.7477	0.00072013	0.000791931	9.49008e-07		0.000108162	0.000528	5.47615e-05
37.7928	0.000700977	0.000768353	9.05371e-07		0.000104374	0.00051176	5.27423e-05
37.8378	0.000682311	0.000745447	8.63689e-07		0.000100714	0.000496	5.0795e-05
37.8829	0.000664122	0.000723193	8.23874e-07		9.71782e-05	0.000480704	4.89171e-05
37.9279	0.000646397	0.000701574	7.85846e-07		9.37615e-05	0.000465859	4.71062e-05
37.973	0.000629125	0.000680572	7.49528e-07		9.04606e-05	0.000451455	4.53601e-05
38.018	0.000612295	0.000660172	7.14844e-07		8.72717e-05	0.000437476	4.36764e-05
38.0631	0.000595897	0.000640356	6.81723e-07		8.41911e-05	0.000423913	4.20531e-05
38.1081	0.000579919	0.000621109	6.50097e-07		8.12153e-05	0.000410753	4.0488e-05
38.1532	0.000564352	0.000602415	6.19899e-07		7.83408e-05	0.000397984	3.89792e-05
38.1982	0.000549186	0.00058426	5.91068e-07		7.55645e-05	0.000385596	3.75247e-05
38.2432	0.00053441	0.000566628	5.63543e-07		7.2883e-05	0.000373577	3.61226e-05
38.2883	0.000520015	0.000549505	5.37267e-07		7.02932e-05	0.000361918	3.47711e-05
38.3333	0.000505992	0.000532877	5.12185e-07		6.77922e-05	0.000350608	3.34685e-05
38.3784	0.000492332	0.00051673	4.88243e-07		6.5377e-05	0.000339637	3.2213e-05
38.4234	0.000479025	0.000501052	4.65392e-07		6.30447e-05	0.000328995	3.1003e-05
38.4685	0.000466063	0.000485829	4.43583e-07		6.07927e-05	0.000318673	2.9837e-05
38.5135	0.000453437	0.000471049	4.2277e-07		5.86183e-05	0.000308661	2.87133e-05
38.5586	0.00044114	0.000456699	4.02909e-07		5.6519e-05	0.000298952	2.76306e-05
38.6036	0.000429162	0.000442768	3.83957e-07		5.44922e-05	0.000289535	2.65873e-05
38.6486	0.000417497	0.000429244	3.65874e-07		5.25355e-05	0.000280403	2.55821e-05
38.6937	0.000406135	0.000416115	3.48621e-07		5.06466e-05	0.000271548	2.46137e-05
38.7387	0.000395071	0.000403371	3.32161e-07		4.88232e-05	0.000262961	2.36806e-05
38.7838	0.000384295	0.000391001	3.16459e-07		4.70633e-05	0.000254635	2.27818e-05
38.8288	0.000373802	0.000378995	3.01481e-07		4.53645e-05	0.000246562	2.1916e-05
38.8739	0.000363584	0.000367342	2.87194e-07		4.3725e-05	0.000238735	2.1082e-05
38.9189	0.000353634	0.000356032	2.73567e-07		4.21426e-05	0.000231146	2.02788e-05
38.964	0.000343945	0.000345056	2.60571e-07		4.06156e-05	0.000223789	1.95051e-05
39.009	0.000334511	0.000334404	2.48177e-07		3.9142e-05	0.000216657	1.876e-05
39.0541	0.000325326	0.000324067	2.36358e-07		3.772e-05	0.000209744	1.80424e-05
39.0991	0.000316382	0.000314037	2.25087e-07		3.63479e-05	0.000203042	1.73514e-05
39.1441	0.000307675	0.000304305	2.14341e-07		3.5024e-05	0.000196546	1.6686e-05
39.1892	0.000299198	0.000294861	2.04096e-07		3.37467e-05	0.00019025	1.60453e-05
39.2342	0.000290946	0.000285699	1.94328e-07		3.25144e-05	0.000184148	1.54284e-05
39.2793	0.000282912	0.00027681	1.85016e-07		3.13256e-05	0.000178234	1.48344e-05
39.3243	0.000275091	0.000268186	1.7614e-07		3.01788e-05	0.000172502	1.42626e-05
39.3694	0.000267478	0.00025982	1.67679e-07		2.90726e-05	0.000166948	1.37122e-05
39.4144	0.000260067	0.000251705	1.59615e-07		2.80055e-05	0.000161566	1.31823e-05
39.4595	0.000252854	0.000243832	1.51929e-07		2.69763e-05	0.00015635	1.26722e-05
39.5045	0.000245833	0.000236196	1.44605e-07		2.59837e-05	0.000151297	1.21812e-05
39.5495	0.000238999	0.00022879	1.37625e-07		2.50263e-05	0.0001464	1.17087e-05
39.5946	0.000232348	0.000221606	1.30974e-07		2.41031e-05	0.000141656	1.12539e-05
39.6396	0.000225875	0.00021464	1.24637e-07		2.32128e-05	0.00013706	1.08163e-05
39.6847	0.000219575	0.000207883	1.18599e-07		2.23543e-05	0.000132608	1.03951e-05
39.7297	0.000213445	0.00020133	1.12846e-07		2.15265e-05	0.000128294	9.98981e-06
39.7748	0.000207479	0.000194976	1.07366e-07		2.07284e-05	0.000124116	9.59983e-06
39.8198	0.000201673	0.000188815	1.02146e-07		1.99589e-05	0.000120068	9.2246e-06
39.8649	0.000196023	0.000182841	9.71736e-08		1.9217e-05	0.000116148	8.86359e-06
39.9099	0.000190526	0.000177048	9.24375e-08		1.85018e-05	0.000112351	8.51627e-06
39.955	0.000185177	0.000171431	8.79269e-08		1.78123e-05	0.000108673	8.18214e-06
40	0.000179972	0.000165986	8.36313e-08		1.71478e-05	0.000105111	7.86072e-06
40.045	0.000174909	0.000160707	7.95406e-08		1.65072e-05	0.000101662	7.55154e-06
40.0901	0.000169982	0.00015559	7.56454e-08		1.58897e-05	9.83217e-05	7.25415e-06
40.1351	0.000165189	0.000150629	7.19364e-08		1.52946e-05	9.50871e-05	6.96811e-06
40.1802	0.000160526	0.00014582	6.84052e-08		1.47211e-05	9.1955e-05	6.69301e-06
40.2252	0.000155989	0.000141158	6.50432e-08		1.41684e-05	8.89223e-05	6.42844e-06
40.2703	0.000151577	0.00013664	6.18427e-08		1.36358e-05	8.59859e-05	6.17402e-06
40.3153	0.000147284	0.000132261	5.8796e-08		1.31226e-05	8.3143e-05	5.92936e-06
40.3604	0.000143108	0.000128017	5.5896e-08		1.26281e-05	8.03906e-05	5.6941e-06
40.4054	0.000139046	0.000123904	5.31358e-08		1.21516e-05	7.77261e-05	5.4679e-06
40.4505	0.000135096	0.000119918	5.05088e-08		1.16925e-05	7.51466e-05	5.25041e-06
40.4955	0.000131253	0.000116056	4.80086e-08		1.12503e-05	7.26497e-05	5.04132e-06
40.5405	0.000127515	0.000112313	4.56295e-08		1.08242e-05	7.02328e-05	4.84031e-06
40.5856	0.000123881	0.000108686	4.33655e-08		1.04138e-05	6.78933e-05	4.64707e-06
40.6306	0.000120346	0.000105172	4.12114e-08		1.00184e-05	6.5629e-05	4.46132e-06
40.6757	0.000116908	0.000101768	3.91618e-08		9.6376e-06	6.34376e-05	4.28278e-06
40.7207	0.000113564	9.84692e-05	3.72119e-08		9.27081e-06	6.13167e-05	4.11117e-06
40.7658	0.000110313	9.52736e-05	3.53569e-08		8.91754e-06	5.92641e-05	3.94624e-06
40.8108	0.000107152	9.21778e-05	3.35923e-08		8.57732e-06	5.72779e-05	3.78773e-06
40.8559	0.000104077	8.91788e-05	3.19138e-08		8.24968e-06	5.53559e-05	3.63539e-06
40.9009	0.000101088	8.62739e-05	3.03173e-08		7.93417e-06	5.3496e-05	3.48901e-06
40.9459	9.81819e-05	8.346e-05	2.87989e-08		7.63036e-06	5.16965e-05	3.34835e-06
40.991	9.5356e-05	8.07345e-05	2.73549e-08		7.33782e-06	4.99554e-05	3.2132e-06
41.036	9.26085e-05	7.80948e-05	2.59816e-08		7.05616e-06	4.82709e-05	3.08334e-06
41.0811	8.99373e-05	7.55382e-05	2.46758e-08		6.78498e-06	4.66411e-05	2.95858e-06
41.1261	8.73405e-05	7.30622e-05	2.34342e-08		6.52391e-06	4.50645e-05	2.83873e-06
41.1712	8.48159e-05	7.06645e-05	2.22536e-08		6.27257e-06	4.35394e-05	2.72359e-06
41.2162	8.23616e-05	6.83425e-05	2.11313e-08		6.03063e-06	4.2064e-05	2.61298e-06
41.2613	7.99759e-05	6.60941e-05	2.00643e-08		5.79773e-06	4.0637e-05	2.50674e-06
41.3063	7.76568e-05	6.3917e-05	1.905e-08		5.57356e-06	3.92566e-05	2.4047e-06
41.3514	7.54026e-05	6.18089e-05	1.80859e-08		5.3578e-06	3.79216e-05	2.30669e-06
41.3964	7.32115e-05	5.9768e-05	1.71695e-08		5.15014e-06	3.66303e-05	2.21256e-06
41.4414	7.10818e-05	5.77919e-05	1.62986e-08		4.95029e-06	3.53816e-05	2.12217e-06
41.4865	6.90119e-05	5.58789e-05	1.54708e-08		4.75796e-06	3.4174e-05	2.03536e-06
41.5315	6.70001e-05	5.40269e-05	1.46842e-08		4.57288e-06	3.30061e-05	1.95201e-06
41.5766	6.50449e-05	5.22341e-05	1.39368e-08		4.39479e-06	3.18769e-05	1.87197e-06
41.6216	6.31448e-05	5.04987e-05	1.32266e-08		4.22343e-06	3.07849e-05	1.79513e-06
41.6667	6.12982e-05	4.88189e-05	1.25517e-08		4.05855e-06	2.97291e-05	1.72135e-06
41.7117	5.95038e-05	4.7193e-05	1.19106e-08		3.89992e-06	2.87083e-05	1.65051e-06
41.7568	5.77601e-05	4.56194e-05	1.13016e-08		3.74731e-06	2.77214e-05	1.58251e-06
41.8018	5.60656e-05	4.40963e-05	1.0723e-08		3.6005e-06	2.67672e-05	1.51724e-06
41.8468	5.44192e-05	4.26224e-05	1.01734e-08		3.45927e-06	2.58448e-05	1.45458e-06
41.8919	5.28195e-05	4.11959e-05	9.6514e-09		3.32342e-06	2.49531e-05	1.39444e-06
41.9369	5.12651e-05	3.98156e-05	9.15561e-09		3.19275e-06	2.40912e-05	1.33672e-06
41.982	4.97549e-05	3.84798e-05	8.68476e-09		3.06706e-06	2.3258e-05	1.28132e-06
42.027	4.82877e-05	3.71873e-05	8.23761e-09		2.94619e-06	2.24527e-05	1.22816e-06
42.0721	4.68623e-05	3.59368e-05	7.813e-09		2.82994e-06	2.16744e-05	1.17714e-06
42.1171	4.54775e-05	3.47268e-05	7.40983e-09		2.71814e-06	2.09221e-05	1.12818e-06
42.1622	4.41322e-05	3.35562e-05	7.02702e-09		2.61063e-06	2.01951e-05	1.0812e-06
42.2072	4.28253e-05	3.24236e-05	6.66359e-09		2.50726e-06	1.94925e-05	1.03613e-06
42.2523	4.15559e-05	3.1328e-05	6.31856e-09		2.40786e-06	1.88136e-05	9.9288e-07
42.2973	4.03228e-05	3.02681e-05	5.99102e-09		2.31229e-06	1.81575e-05	9.51391e-07
42.3423	3.9125e-05	2.92429e-05	5.68012e-09		2.2204e-06	1.75236e-05	9.11588e-07
42.3874	3.79617e-05	2.82512e-05	5.38501e-09		2.13206e-06	1.69111e-05	8.73406e-07
42.4324	3.68317e-05	2.7292e-05	5.10493e-09		2.04714e-06	1.63193e-05	8.36781e-07
42.4775	3.57343e-05	2.63642e-05	4.83912e-09		1.9655e-06	1.57476e-05	8.0165e-07
42.5225	3.46684e-05	2.54669e-05	4.58686e-09		1.88703e-06	1.51952e-05	7.67955e-07
42.5676	3.36333e-05	2.45992e-05	4.34748e-09		1.81161e-06	1.46616e-05	7.35639e-07
42.6126	3.26281e-05	2.376e-05	4.12035e-09		1.73911e-06	1.41461e-05	7.04646e-07
42.6577	3.16519e-05	2.29484e-05	3.90484e-09		1.66943e-06	1.36482e-05	6.74925e-07
42.7027	3.07039e-05	2.21637e-05	3.70037e-09		1.60247e-06	1.31672e-05	6.46424e-07
42.7477	2.97834e-05	2.14049e-05	3.5064e-09		1.53812e-06	1.27026e-05	6.19095e-07
42.7928	2.88896e-05	2.06712e-05	3.32239e-09		1.47628e-06	1.22539e-05	5.92891e-07
42.8378	2.80217e-05	1.99618e-05	3.14784e-09		1.41686e-06	1.18206e-05	5.67767e-07
42.8829	2.7179e-05	1.92759e-05	2.98228e-09		1.35976e-06	1.14021e-05	5.4368e-07
42.9279	2.63608e-05	1.86129e-05	2.82525e-09		1.30491e-06	1.09979e-05	5.20588e-07
42.973	2.55664e-05	1.79719e-05	2.67632e-09		1.2522e-06	1.06076e-05	4.98452e-07
43.018	2.47952e-05	1.73522e-05	2.53509e-09		1.20157e-06	1.02308e-05	4.77232e-07
43.0631	2.40465e-05	1.67532e-05	2.40117e-09		1.15292e-06	9.86688e-06	4.56893e-07
43.1081	2.33197e-05	1.61742e-05	2.27418e-09		1.10619e-06	9.51552e-06	4.37397e-07
43.1532	2.26141e-05	1.56146e-05	2.15377e-09		1.06131e-06	9.17628e-06	4.18713e-07
43.1982	2.19292e-05	1.50737e-05	2.03961e-09		1.01819e-06	8.84876e-06	4.00805e-07
43.2432	2.12644e-05	1.45509e-05	1.93139e-09		9.76784e-07	8.53257e-06	3.83645e-07
43.2883	2.0619e-05	1.40456e-05	1.82879e-09		9.37013e-07	8.22732e-06	3.672e-07
43.3333	1.99926e-05	1.35574e-05	1.73154e-09		8.98817e-07	7.93266e-06	3.51442e-07
43.3784	1.93846e-05	1.30855e-05	1.63936e-09		8.62137e-07	7.64823e-06	3.36343e-07
43.4234	1.87945e-05	1.26296e-05	1.55199e-09		8.26913e-07	7.37368e-06	3.21876e-07
43.4685	1.82218e-05	1.2189e-05	1.46918e-09		7.9309e-07	7.10868e-06	3.08016e-07
43.5135	1.7666e-05	1.17633e-05	1.39071e-09		7.60614e-07	6.85291e-06	2.94737e-07
43.5586	1.71266e-05	1.1352e-05	1.31635e-09		7.29432e-07	6.60607e-06	2.82017e-07
43.6036	1.66032e-05	1.09546e-05	1.24589e-09		6.99494e-07	6.36785e-06	2.69831e-07
43.6486	1.60952e-05	1.05707e-05	1.17913e-09		6.70753e-07	6.13795e-06	2.58159e-07
43.6937	1.56023e-05	1.01998e-05	1.11587e-09		6.43161e-07	5.91611e-06	2.4698e-07
43.7387	1.5124e-05	9.84153e-06	1.05595e-09		6.16674e-07	5.70204e-06	2.36272e-07
43.7838	1.46599e-05	9.49543e-06	9.99177e-10		5.9125e-07	5.49548e-06	2.26017e-07
43.8288	1.42096e-05	9.16111e-06	9.45401e-10		5.66846e-07	5.29618e-06	2.16196e-07
43.8739	1.37727e-05	8.8382e-06	8.94465e-10		5.43423e-07	5.10389e-06	2.06791e-07
43.9189	1.33488e-05	8.52631e-06	8.46221e-10		5.20942e-07	4.91837e-06	1.97785e-07
43.964	1.29375e-05	8.22508e-06	8.0053e-10		4.99368e-07	4.7394e-06	1.89162e-07
44.009	1.25385e-05	7.93416e-06	7.57259e-10		4.78663e-07	4.56674e-06	1.80905e-07
44.0541	1.21515e-05	7.65321e-06	7.16283e-10		4.58795e-07	4.40018e-06	1.73e-07
44.0991	1.1776e-05	7.3819e-06	6.77483e-10		4.3973e-07	4.23952e-06	1.65432e-07
44.1441	1.14117e-05	7.11991e-06	6.40745e-10		4.21437e-07	4.08455e-06	1.58187e-07
44.1892	1.10584e-05	6.86693e-06	6.05962e-10		4.03885e-07	3.93508e-06	1.51251e-07
44.2342	1.07156e-05	6.62266e-06	5.73031e-10		3.87045e-07	3.79092e-06	1.44613e-07
44.2793	1.03832e-05	6.38681e-06	5.41857e-10		3.7089e-07	3.65188e-06	1.38258e-07
44.3243	1.00608e-05	6.1591e-06	5.12348e-10		3.55392e-07	3.5178e-06	1.32176e-07
44.3694	9.74801e-06	5.93927e-06	4.84415e-10		3.40524e-07	3.38849e-06	1.26355e-07
44.4144	9.44469e-06	5.72703e-06	4.57977e-10		3.26263e-07	3.26379e-06	1.20784e-07
44.4595	9.15052e-06	5.52215e-06	4.32956e-10		3.12584e-07	3.14356e-06	1.15453e-07
44.5045	8.86524e-06	5.32438e-06	4.09276e-10		2.99464e-07	3.02762e-06	1.10352e-07
44.5495	8.58857e-06	5.13348e-06	3.86868e-10		2.86881e-07	2.91583e-06	1.0547e-07
44.5946	8.32028e-06	4.94921e-06	3.65664e-10		2.74813e-07	2.80805e-06	1.008e-07
44.6396	8.06011e-06	4.77135e-06	3.45601e-10		2.6324e-07	2.70414e-06	9.63308e-08
44.6847	7.80783e-06	4.5997e-06	3.26618e-10		2.52142e-07	2.60397e-06	9.20554e-08
44.7297	7.5632e-06	4.43403e-06	3.0866e-10		2.415e-07	2.5074e-06	8.79653e-08
44.7748	7.32601e-06	4.27416e-06	2.9167e-10		2.31296e-07	2.41431e-06	8.40526e-08
44.8198	7.09604e-06	4.11987e-06	2.75599e-10		2.21512e-07	2.32457e-06	8.03099e-08
44.8649	6.87306e-06	3.97099e-06	2.60397e-10		2.12133e-07	2.23808e-06	7.67299e-08
44.9099	6.65688e-06	3.82732e-06	2.46019e-10		2.0314e-07	2.15471e-06	7.33057e-08
44.955	6.4473e-06	3.6887e-06	2.3242e-10		1.94519e-07	2.07436e-06	7.00307e-08
45	6.24411e-06	3.55495e-06	2.1956e-10		1.86255e-07	1.99692e-06	6.68987e-08
45.045	6.04714e-06	3.42591e-06	2.07398e-10		1.78333e-07	1.92229e-06	6.39034e-08
45.0901	5.8562e-06	3.30141e-06	1.95898e-10		1.7074e-07	1.85037e-06	6.10391e-08
45.1351	5.6711e-06	3.18131e-06	1.85024e-10		1.63463e-07	1.78106e-06	5.83003e-08
45.1802	5.49169e-06	3.06544e-06	1.74743e-10		1.56488e-07	1.71428e-06	5.56814e-08
45.2252	5.31778e-06	2.95367e-06	1.65023e-10		1.49803e-07	1.64993e-06	5.31775e-08
45.2703	5.14921e-06	2.84586e-06	1.55835e-10		1.43397e-07	1.58793e-06	5.07836e-08
45.3153	4.98583e-06	2.74186e-06	1.47148e-10		1.37258e-07	1.5282e-06	4.8495e-08
45.3604	4.82748e-06	2.64156e-06	1.38938e-10		1.31376e-07	1.47065e-06	4.63071e-08
45.4054	4.67402e-06	2.54482e-06	1.31177e-10		1.25739e-07	1.4152e-06	4.42157e-08
45.4505	4.52528e-06	2.45152e-06	1.23842e-10		1.20339e-07	1.36179e-06	4.22166e-08
45.4955	4.38115e-06	2.36154e-06	1.16911e-10		1.15165e-07	1.31034e-06	4.03058e-08
45.5405	4.24146e-06	2.27477e-06	1.1036e-10		1.10208e-07	1.26078e-06	3.84795e-08
45.5856	4.10611e-06	2.19109e-06	1.0417e-10		1.05459e-07	1.21304e-06	3.67341e-08
45.6306	3.97494e-06	2.1104e-06	9.83212e-11		1.0091e-07	1.16706e-06	3.50661e-08
45.6757	3.84785e-06	2.0326e-06	9.2795e-11		9.65528e-08	1.12277e-06	3.34721e-08
45.7207	3.7247e-06	1.95759e-06	8.75741e-11		9.2379e-08	1.08012e-06	3.19489e-08
45.7658	3.60537e-06	1.88527e-06	8.26418e-11		8.83814e-08	1.03905e-06	3.04935e-08
45.8108	3.48976e-06	1.81554e-06	7.79825e-11		8.45526e-08	9.99494e-07	2.91029e-08
45.8559	3.37775e-06	1.74831e-06	7.35813e-11		8.08858e-08	9.61404e-07	2.77743e-08
45.9009	3.26923e-06	1.68351e-06	6.94243e-11		7.73742e-08	9.24725e-07	2.65049e-08
45.9459	3.1641e-06	1.62104e-06	6.54981e-11		7.40115e-08	8.89409e-07	2.52923e-08
45.991	3.06225e-06	1.56082e-06	6.17901e-11		7.07915e-08	8.55405e-07	2.4134e-08
46.036	2.96359e-06	1.50278e-06	5.82885e-11		6.77084e-08	8.22665e-07	2.30275e-08
46.0811	2.86801e-06	1.44683e-06	5.49819e-11		6.47563e-08	7.91146e-07	2.19706e-08
46.1261	2.77543e-06	1.39291e-06	5.18597e-11		6.193e-08	7.60801e-07	2.09612e-08
46.1712	2.68575e-06	1.34094e-06	4.89118e-11		5.92241e-08	7.31589e-07	1.99971e-08
46.2162	2.59889e-06	1.29086e-06	4.61286e-11		5.66337e-08	7.03469e-07	1.90763e-08
46.2613	2.51476e-06	1.24259e-06	4.35011e-11		5.4154e-08	6.76401e-07	1.81971e-08
46.3063	2.43327e-06	1.19608e-06	4.10207e-11		5.17803e-08	6.50347e-07	1.73575e-08
46.3514	2.35435e-06	1.15126e-06	3.86794e-11		4.95083e-08	6.2527e-07	1.65557e-08
46.3964	2.27792e-06	1.10808e-06	3.64695e-11		4.73337e-08	6.01134e-07	1.57902e-08
46.4414	2.2039e-06	1.06647e-06	3.43837e-11		4.52524e-08	5.77905e-07	1.50593e-08
46.4865	2.13222e-06	1.02638e-06	3.24152e-11		4.32605e-08	5.5555e-07	1.43616e-08
46.5315	2.0628e-06	9.87754e-07	3.05575e-11		4.13543e-08	5.34038e-07	1.36954e-08
46.5766	1.99558e-06	9.50543e-07	2.88046e-11		3.95301e-08	5.13336e-07	1.30595e-08
46.6216	1.93049e-06	9.14695e-07	2.71505e-11		3.77846e-08	4.93416e-07	1.24524e-08
46.6667	1.86746e-06	8.80163e-07	2.55898e-11		3.61144e-08	4.74249e-07	1.1873e-08
46.7117	1.80643e-06	8.46898e-07	2.41173e-11		3.45164e-08	4.55807e-07	1.132e-08
46.7568	1.74735e-06	8.14857e-07	2.27282e-11		3.29875e-08	4.38063e-07	1.07921e-08
46.8018	1.69014e-06	7.83995e-07	2.14178e-11		3.15247e-08	4.20992e-07	1.02884e-08
46.8468	1.63475e-06	7.5427e-07	2.01816e-11		3.01254e-08	4.0457e-07	9.80766e-09
46.8919	1.58113e-06	7.25642e-07	1.90157e-11		2.87868e-08	3.88771e-07	9.34891e-09
46.9369	1.52922e-06	6.98071e-07	1.7916e-11		2.75063e-08	3.73574e-07	8.91116e-09
46.982	1.47896e-06	6.7152e-07	1.68789e-11		2.62815e-08	3.58955e-07	8.49347e-09
47.027	1.43032e-06	6.45951e-07	1.59008e-11		2.511e-08	3.44893e-07	8.09495e-09
47.0721	1.38323e-06	6.2133e-07	1.49785e-11		2.39896e-08	3.31369e-07	7.71473e-09
47.1171	1.33764e-06	5.97622e-07	1.41088e-11		2.29181e-08	3.18361e-07	7.35199e-09
47.1622	1.29352e-06	5.74795e-07	1.32888e-11		2.18933e-08	3.05851e-07	7.00596e-09
47.2072	1.25081e-06	5.52816e-07	1.25156e-11		2.09134e-08	2.9382e-07	6.67586e-09
47.2523	1.20948e-06	5.31656e-07	1.17868e-11		1.99764e-08	2.8225e-07	6.36099e-09
47.2973	1.16947e-06	5.11284e-07	1.10997e-11		1.90804e-08	2.71124e-07	6.06067e-09
47.3423	1.13076e-06	4.91672e-07	1.0452e-11		1.82237e-08	2.60426e-07	5.77423e-09
47.3874	1.09328e-06	4.72793e-07	9.84145e-12		1.74046e-08	2.50139e-07	5.50104e-09
47.4324	1.05702e-06	4.54619e-07	9.26603e-12		1.66216e-08	2.40248e-07	5.24051e-09
47.4775	1.02193e-06	4.37126e-07	8.72372e-12		1.5873e-08	2.30739e-07	4.99207e-09
47.5225	9.87971e-07	4.20288e-07	8.21265e-12		1.51573e-08	2.21596e-07	4.75516e-09
47.5676	9.55111e-07	4.04082e-07	7.73103e-12		1.44733e-08	2.12807e-07	4.52926e-09
47.6126	9.23314e-07	3.88484e-07	7.27722e-12		1.38194e-08	2.04357e-07	4.31387e-09
47.6577	8.92548e-07	3.73473e-07	6.84962e-12		1.31945e-08	1.96235e-07	4.10851e-09
47.7027	8.62779e-07	3.59027e-07	6.44675e-12		1.25972e-08	1.88428e-07	3.91273e-09
47.7477	8.33977e-07	3.45125e-07	6.0672e-12		1.20263e-08	1.80923e-07	3.72609e-09
47.7928	8.06111e-07	3.31748e-07	5.70964e-12		1.14808e-08	1.7371e-07	3.54817e-09
47.8378	7.79152e-07	3.18875e-07	5.37283e-12		1.09594e-08	1.66778e-07	3.37857e-09
47.8829	7.5307e-07	3.0649e-07	5.05557e-12		1.04613e-08	1.60115e-07	3.21692e-09
47.9279	7.27838e-07	2.94573e-07	4.75676e-12		9.98528e-09	1.53712e-07	3.06284e-09
47.973	7.0343e-07	2.83107e-07	4.47533e-12		9.53048e-09	1.47559e-07	2.91599e-09
48.018	6.79818e-07	2.72077e-07	4.21029e-12		9.09594e-09	1.41646e-07	2.77605e-09
48.0631	6.56978e-07	2.61465e-07	3.9607e-12		8.6808e-09	1.35964e-07	2.64268e-09
48.1081	6.34886e-07	2.51256e-07	3.72568e-12		8.28421e-09	1.30504e-07	2.51559e-09
48.1532	6.13517e-07	2.41436e-07	3.50439e-12		7.90535e-09	1.25259e-07	2.39449e-09
48.1982	5.92848e-07	2.3199e-07	3.29604e-12		7.54344e-09	1.20219e-07	2.27911e-09
48.2432	5.72858e-07	2.22905e-07	3.09989e-12		7.19776e-09	1.15377e-07	2.16917e-09
48.2883	5.53524e-07	2.14166e-07	2.91523e-12		6.86759e-09	1.10725e-07	2.06443e-09
48.3333	5.34825e-07	2.05761e-07	2.7414e-12		6.55224e-09	1.06257e-07	1.96465e-09
48.3784	5.16742e-07	1.97678e-07	2.57778e-12		6.25107e-09	1.01964e-07	1.86959e-09
48.4234	4.99255e-07	1.89904e-07	2.42378e-12		5.96345e-09	9.78408e-08	1.77904e-09
48.4685	4.82344e-07	1.82428e-07	2.27883e-12		5.68879e-09	9.38802e-08	1.69279e-09
48.5135	4.65991e-07	1.75239e-07	2.14242e-12		5.42652e-09	9.0076e-08	1.61064e-09
48.5586	4.50179e-07	1.68327e-07	2.01406e-12		5.17609e-09	8.64224e-08	1.5324e-09
48.6036	4.34889e-07	1.6168e-07	1.89326e-12		4.93697e-09	8.29134e-08	1.45789e-09
48.6486	4.20105e-07	1.5529e-07	1.77961e-12		4.70867e-09	7.95435e-08	1.38693e-09
48.6937	4.05811e-07	1.49145e-07	1.67267e-12		4.49072e-09	7.63073e-08	1.31935e-09
48.7387	3.91991e-07	1.43238e-07	1.57206e-12		4.28264e-09	7.31997e-08	1.255e-09
48.7838	3.78629e-07	1.37559e-07	1.47741e-12		4.084e-09	7.02156e-08	1.19373e-09
48.8288	3.65711e-07	1.321e-07	1.38838e-12		3.89439e-09	6.73503e-08	1.13539e-09
48.8739	3.53223e-07	1.26852e-07	1.30463e-12		3.71341e-09	6.45992e-08	1.07985e-09
48.9189	3.41151e-07	1.21807e-07	1.22585e-12		3.54066e-09	6.19579e-08	1.02697e-09
48.964	3.29481e-07	1.16958e-07	1.15177e-12		3.37578e-09	5.9422e-08	9.76637e-10
49.009	3.18199e-07	1.12297e-07	1.08209e-12		3.21843e-09	5.69874e-08	9.28719e-10
49.0541	3.07295e-07	1.07818e-07	1.01657e-12		3.06826e-09	5.46503e-08	8.83107e-10
49.0991	2.96754e-07	1.03513e-07	9.5495e-13		2.92495e-09	5.24068e-08	8.39691e-10
49.1441	2.86567e-07	9.93754e-08	8.97014e-13		2.78821e-09	5.02533e-08	7.9837e-10
49.1892	2.7672e-07	9.53994e-08	8.42542e-13		2.65773e-09	4.81862e-08	7.59043e-10
49.2342	2.67203e-07	9.15787e-08	7.91328e-13		2.53323e-09	4.62022e-08	7.21616e-10
49.2793	2.58005e-07	8.79073e-08	7.43181e-13		2.41444e-09	4.4298e-08	6.86e-10
49.3243	2.49116e-07	8.43795e-08	6.97921e-13		2.30112e-09	4.24705e-08	6.52108e-10
49.3694	2.40525e-07	8.09899e-08	6.55377e-13		2.193e-09	4.07166e-08	6.19859e-10
49.4144	2.32224e-07	7.77332e-08	6.15389e-13		2.08987e-09	3.90335e-08	5.89175e-10
49.4595	2.24202e-07	7.46043e-08	5.77805e-13		1.99149e-09	3.74183e-08	5.59981e-10
49.5045	2.1645e-07	7.15984e-08	5.42482e-13		1.89764e-09	3.58685e-08	5.32206e-10
49.5495	2.08959e-07	6.87107e-08	5.09288e-13		1.80814e-09	3.43814e-08	5.05783e-10
49.5946	2.01722e-07	6.59367e-08	4.78096e-13		1.72277e-09	3.29546e-08	4.80647e-10
49.6396	1.94729e-07	6.32721e-08	4.48786e-13		1.64135e-09	3.15856e-08	4.56737e-10
49.6847	1.87972e-07	6.07126e-08	4.21247e-13		1.5637e-09	3.02722e-08	4.33995e-10
49.7297	1.81444e-07	5.82541e-08	3.95374e-13		1.48966e-09	2.90122e-08	4.12363e-10
49.7748	1.75137e-07	5.58929e-08	3.71067e-13		1.41905e-09	2.78035e-08	3.9179e-10
49.8198	1.69045e-07	5.36252e-08	3.48233e-13		1.35172e-09	2.66439e-08	3.72224e-10
49.8649	1.63158e-07	5.14473e-08	3.26784e-13		1.28752e-09	2.55317e-08	3.53617e-10
49.9099	1.57472e-07	4.93558e-08	3.06637e-13		1.22632e-09	2.44648e-08	3.35923e-10
49.955	1.51979e-07	4.73473e-08	2.87715e-13		1.16796e-09	2.34415e-08	3.19098e-10
50	1.46674e-07	4.54186e-08	2.69943e-13		1.11233e-09	2.24601e-08	3.03101e-10
