# Supplementary material for: Pathway-specific dysregulation of striatal excitatory synapses by LRRK2 mutations
Source: eLife. 2020 Oct 2;9:e58997. doi: 10.7554/eLife.58997 (PMC7609054; doi:10.7554/eLife.58997)
Supplement: Figure 4—source data 1. [file elife-58997-fig4-data1.xlsx]

## Sheet: Figure4B
GFP-				GFP+
+/+	+/RC	+/GS		+/+	+/RC	+/GS
3.52542	3.49153	1.22034		3.01695	0.644068	0.881356
1.66102	0.694915	0.881356		1.71186	2.37288	0.949153
2.28814	0.694915	1.57627		1.98305	0.898305	1.05085
5.79661	2.08475	0.525424		2.62712	0.627119	0.59322
2.81356	4.88136	1		1.8983	1.05085	2.08475
2.67797	0.966102	0.661017		2.9322	2.10169	1.91525
1.27119	2.42373	1.57627		2.62712	1.01695	2.76271
2.9322	1.27119	2.47458		4.15254	1.79661	1.50848
2.22034	2.64407	0.474576		0.576271	0.813559	1.40678
3.44068	1.05085	0.661017		1.8983	3.84746	0.288136
0.966102	0.254237	3.64407		1.54237	1.27119	0.20339
3.98305	0.491525	0.20339		0.711864	1.54237	0.576271
1.59322	1.59322	1.59322		4.42373	1.35593	1.50848
	0.220339				1.40678
					1.0339
					0.457627

## Sheet: Figure4C
GFP-				GFP+
+/+	+/RC	+/GS		+/+	+/RC	+/GS
9.2271	10.5508	7.17396		9.57806	9.92661	9.00322
6.34524	7.65191	8.10962		10.3409	8.78489	8.9839
11.2108	8.91577	7.9618		6.53217	8.14076	6.5993
15.4326	10.4099	6.68119		8.04012	9.29316	7.87056
9.26268	12.779	12.2268		9.55707	10.3012	9.29331
8.45238	7.37715	9.12047		8.76334	8.81089	10.806
7.11964	8.15472	6.39741		8.32993	8.40257	10.0525
8.06408	12.4765	7.44981		8.93106	10.2912	8.27948
7.10798	9.37875	6.90707		7.13274	8.4869	6.94127
8.36868	7.82054	6.13178		7.49531	8.06474	6.38343
8.27533	6.7982	9.65657		8.16247	8.35873	5.91801
6.34514	7.5757	6.35666		7.2691	10.8027	6.513
6.65789	9.52445	8.6149		11.1723	10.243	7.80867
	6.0062				7.31683
					8.18128
					7.16969

## Sheet: Figure4D
GFP-				GFP+
+/+	+/RC	+/GS		+/+	+/RC	+/GS
1033.2	464	3274.8		573.9	162	79.3
208	509.7	122.6		949	2344.4	741.4
771.6	408.6	558		520.3	5243.4	235.3
301.9	25.1	2147.2		653.4	1063	455.6
124.2	759.9	365.3		416.5	6069.9	6437.1
53.4	330.6	1665.6		310.3	680.8	2106.4
13.5	46.6	3608.9		538.5	326.9	2500.7
276.1	1902.4	468.9		808.7	2001.5	2943
403	1664.9	584.6		410.9	974.8	1918.3
1043.7	227.8	90.5		730.7	2346.3	119.4
533.1	1671	1902.1		240.6	2266.4	59.1
1136	112.4	5722.7		486.2	5892.2	663.2
965.8	144.6	4842.7		400.9	1343.2	736.1
207	664.9	480.1		2011.4	2758.6	1075.1
74.3	155.1	840		384.9	2677.7	368.7
833.5	253.2	779.8		2460.1	1820.4	5640.6
107.4	63.4	839.9		311.7	9787.4	1696.1
533.8	933.2	677.9		42.2	3672.4	625.6
218.7	1635.2	301.2		285.2	498.2	516.5
124.4	56.1	575		670.5	2638.4	164.1
1322.4	292.5	87.2		539.2	660.6	4528
368.7	2335.3	2006.5		467	3640.1	757.1
177.7	55.6	966.7		883.1	2997.6	1784
1141.1	23	68		335.8	2909.6	4445.1
289.2	681.3	107		191.3	3179.1	2829.4
512.9	1351.8	520.4		487.3	2298.4	2998
354.1	25.9	1620.4		1657.5	8037	1303.8
81.8	1111.1	6321.7		1152.3	339.1	2331.5
291.7	194.7	3449.3		597	1229.7	194.4
2215.1	1161.1	168.2		109.1	1593.7	945.5
1316.1	897.9	317.8		265.5	7038.6	1659.8
343.7	471.9	6976.4		878.8	4430.5	2905.4
857	862.4	192.5		1510.1	589.8	785
803.1	1010.5	473.5		101.2	641.1	299
285.2	940.9	209.8		1013.8	4423.6	4760.9
23.9	226.8	333.7		121.2	2843.2	8070.3
1110.7	593.7	1257.1		1007	314.5	3329.4
739.7	27.4	2211.3		315.2	7549.3	920.6
72.1	839.6	1248.3		1683.7	75	3585.1
1303.4	507.6	1716.4		321.4	583.8	7563.3
74.8	488.9	3297		1661.1	385.6	274.7
600.8	848.7	1428.3		536.8	115.3	54.8
423.3	616.2	3580.5		523.7	123.6	447.2
1039.1	241.8	28.8		1457.5	1282.7	607.7
99.9	531.8	614.3		994.1	397.9	1776.3
1480.5	901.1	373.4		75.1	910.5	3815.6
34.3	1001.2	714.2		13.9	262.4	1247.7
201.8	828	42.6		95.1	318.1	399.6
235.4	1123.8	314.9		45.1	642.7	6602.2
69.2	545.3	1440.8		551.9	64.7	1034.2
672	615	655.2		311	1243.2	2732.1
1105.1	432.5	3500.4		156.6	2996.7	10420.8
652.7	199.5	1788.6		786	301.8	908.7
190.5	915.8	841.2		228.1	1404.1	619.5
177.4	1490.7	1252.8		27.8	638	345.9
269.1	839.5	129.2		31.1	194.7	1409.7
98.4	1935.3	262.4		1344.4	212.7	1380.4
212.8	824.2	164		237.9	145.5	1452.7
371.5	585.5	2115.8		46.7	614.2	272
129.4	1905.9	1052.1		420.8	1472.8	1262.1
360.8	43.8	3650.9		1621.2	504	35.8
604.7	232.6	1800.8		274.1	21.1	5479.3
353	710.1	2331.1		140.4	36.8	483.3
452.3	102.2	2119.1		169.5	228.2	206.5
668.2	3300.1	1937.4		1020.8	1092.5	2989.2
190.7	95.7	1896.6		1122.4	93.5	4914.6
772.6	356.1	193.9		773.2	226.3	1821.1
184.5	118.7	869.3		670.9	141.5	2679.8
675.2	784.9	471.4		524.9	171	2242.9
1198.9	912.9	2385		2617.1	534.5	398.6
858.5	863.3	4484.2		210.1	771.8	204.7
432.4	930.9	125		1050.1	265.2	2645.3
726.1	794.1	1751.1		1701.6	429.8	1334
87.8	297.9	355.2		909.8	495	850.6
2413.1	136.6	5472		2669.8	290.3	148.6
29.5	343.8	2686.9		36.9	600.6	6419.5
1707	21.5	145.6		980.4	905.6	612
582.3	241.1	6046.1		274.6	120.3	2107.9
295	229.9	3007.6		518.9	295.8	3016.4
249.1	1686.4	3116.6		299.2	1373.2	5462.3
302.6	9.5	1655.1		427.9	618.6	736
461.5	658.4	3947.1		413.7	160	1709.2
33.7	1006.8	1912.3		338.9	1342.9	2686
383.7	718.3	697.1		777.7	719.2	266.4
5.7	258.7	2974.5		865.3	3228.7	4489
824.4	174.6	1782		527.9	775.1	5522.9
817.9	58.6	574.1		216.1	1952.6	3725
513.5	15.2	8579.1		127.3	5892.3	398.1
42.4	745.1	1061.1		303.6	961.8	5605.8
15.4	47.8	1031.9		413.2	282.3	5421.2
36.4	33.5	1916.2		1063.9	308.1	1556.6
1490	123.1	860.9		541.1	641	273.2
2015	839.2	1173.2		16.6	1409	471.1
194.4	694.3	1089.8		2309.2	1156.2	1286
46.3	99.7	91.3		333.8	633.4	414.7
87.6	3.5	1066.1		312	1188.2	2786.9
2002.4	533.7	2069		1093.8	1482.1	428.8
51.9	1672.7	1397.7		859.9	557.1	106
49.8	489.5	440.2		477.4	1437.6	6327.8
760.2	144.9	572.9		500.3	1001.8	1316.7
475.2	814.4	4868.5		40.4	52.4	2522.4
635.7	465.6	1680.2		84.1	674.1	2123.8
199.6	1398.4	5218.9		777.2	983.6	214.5
329.4	605.8	223.8		211.2	702.7	877.4
1283.3	228.1	847		1014.8	247	1147.4
1075.9	224.5	1898.9		655.5	1503.8	1775.9
84.1	165.2	903.2		538.8	350.4	420.8
150.9	21.9	82.1		190.6	434.2	1377.5
690.8	62.5	2851		507.1	1153.4	1107.4
500.1	89.8	2521.8		598	581.4	305.2
150.6	705.5	36.5		273.6	972.4	1577.7
478.7	532	858		273.8	110.2	5022.5
117.9	119.3	4683.4		1436.6	224	1325.6
484.2	448.8	121.6		2843.3	1791.1	957.2
533.1	398.9	4154.2		469.4	361	2584.2
618.2	84	2036.3		26.1	1221	2515.6
391.4	2338.9	2040.9		2244.6	1375.6	307.6
138	155.3	558.2		950.2	38.7	725.4
432	334.5	1257.6		294.7	277.8	184.9
924.2	994.3	1433.8		217.7	535	2129.2
322.6	659	1204.8		965.6	365	882.7
986.6	98.6	4036.7		348.3	660	1457
63.3	740.7	4927		1111.9	611.7	558.8
551.6	577.6	2586.1		327.5	338.5	4874.8
222	811.4	1743.3		1255.3	929.9	464.3
156.7	1325.9	522.9		10.4	708.9	2405.6
307.4	1003.5	553.9		90.3	514.2	985.2
184	379.4	1906.2		183.3	505.9	2233.2
363.8	178.7	2655.6		112	1094.1	123.9
213.6	98.3	901.3		72.5	951.4	2286.6
136.7	111.7	1786.3		221	28.5	1417.5
299.3	93	1127.9		95.4	4069.4	3992.1
751.6	13.7	3443.4		45.1	305.8	778.4
146.4	17.4	1244.9		166.3	502.5	860.5
260.1	395.1	142.8		767.1	595	543.5
173.7	341.1	633.9		1138.2	1736.4	343.5
126.2	881.1	371.7		675.1	771.7	1015.8
174.6	587	485.4		381.8	2562.7	39.6
987.8	273.9	928.5		827.4	1210.8	1920
413.3	538.1	458		148.5	1557.4	122.4
3089.9	150.7	514.1		859.2	834.6	7037.2
848.5	574.9	472.4		1823.1	2235.6	1625.4
1307.2	700.4	1016.3		500.8	668.6	3760.5
580.8	375.7	388.1		380.9	832	4329.4
17.5	351.9	918.3		69.5	485.5	8214.5
90.8	183.4	2428.6		234.1	963.6	217.8
218.1	224.9	2722.4		538.5	424	1544.8
242.6	501.4	896.7		339.7	766.5	452
915.1	735	559		146.1	1330.1	1277.6
483.2	955.5	104.4		1441.5	776.3	5132
52	209.4	365.9		2461	198.5	1538.3
807.7	179.1	1050.5		142	2056.7	712
1972.7	99.2	34.2		1276.4	2385.5	809.3
246.2	48.7	337.3		262.7	984.2	889.8
120.8	222.2	505.2		1454.9	657.7	2515.1
493.2	299.5	194.9		385.9	402.7	995.6
260.7	119.2	950.7		224.2	1612.4	2872.2
515.1	97.8	388.1		532.9	1242.5	46.5
1603.1	396.7	2179.8		118.1	163.5	2796.4
517.7	467.8	242.9		527.5	889.9	487.6
949.5	554.6	451.7		204.9	2322.3	17.1
223	1241.3	507.1		242.2	24.5	4086.1
91	367.3	265		1122.8	108.7	2342.8
994.2	119.6	864.9		1561.8	1432.1	1422.2
575.1	220.9	920.9		1290	1338.4	743.5
310.9	248.4	718.3		631.6	1068.3	3346.1
350.9	578.5	1366.5		2685.4	720.7	694.6
737.1	1548.9	259.2		1381.3	422.4	1269.1
1230.2	86.3	46.7		216.6	313.1	1308.3
309.7	362.7	588.9		856.5	859.8	536.2
339.9	1079.2	777.9		81.7	292.9	4769.9
2774	470.7	1360.4		42.9	466.5	396.3
1020.2	962.4	453		549.6	299.9	2608.9
52.5	269.8	4265		462.2	954.5	4836.9
70.9	431.3	18.7		348.1	890.5	2070.2
538.1	442.3	1006.1		688.7	981.1	3238.9
512.9	355.8	169.6		54.7	564.8	122.3
802.9	389.9	1203.8		449.4	246.7	4856.3
2397.2	436	711.9		1666.6	259.8	1746.6
1642.2	88.8	775.4		500.9	3099.4	5835.2
23.1	69.7	163.3		492.3	5561.9	1612.8
243.7	584.6	537.1		355.5	4825	48.6
626.4	69.1	381.3		34.7	4112.2	8977.8
620.8	188	521		215.5	226.5	1031.8
781.1	509.6	993.9		2450.3	252.9	4779.8
459.7	1337.6	72.1		902.6	3193	382.4
663.9	485.1	1279.9		570.8	2247.3	2182.4
498.6	1989.7	738.4		20	61.9	524.4
33.8	551.4	2129.8		803.4	1318.9	4611.9
298.4	1248.1	756.4		553.1	900.6	3498.2
186.9	408.3	1520.1		1620.4	3257.9	8438.1
2554.7	38.5	8603		227.8	621.1	3192.2
910.2	54.1	6566.8		1960.7	2698.7	655.5
468.7	3018.8	1441		3529.4	4094.4	643.1
321.5	1262.1	1075.3		530.2	4235.3	64
477.2	197.6	11.7		1380.6	1339.3	3218.4
964.1	670.2	2944.6		283.3	6670.7	3662.2
718.5	62.5	1871.6		656.1	897	332.6
150.5	211.9	2083.6		528.1	460	2372.4
192.8	982.4	821.8		293.3	2032	2275.7
679.9	674.1	1887.7		85.4	1267.8	1157.1
193.7	487.9	2259.5		2169.2	4208.1	3437.1
690.3	660.4	465.1		950.8	1264.9	1978.1
170.3	329.3	649.9		128.9	2165.3	5048.3
227.8	262.6	636.5		707.8	1978.6	3519.5
1758.7	412.5	1628.2		943.7	1287.8	2214.6
1243.9	196.1	2284.3		402.1	1482.1	608.2
470.6	2454.7	2317.6		511.7	1775.2	639.8
865.8	3027	211.6		2233.3	6042	547.6
73.8	2602.9	7109.4		156.3	3345.5	893.4
632	2147.5	1262.9		1101.3	2783.6	1103.8
1746.8	3276.9	2624.6		576.4	209.5	338.1
1293.7	482.8	721.8		1767.1	31.5	1395.3
1958.4	5869.5	45.9		334.8	1069.9	190.1
756.1	219	636.1		1278.8	2817.1	3084.6
2360.2	8882.7	1535.4		1283.8	1830.4	843
972.6	3601.9	3308.1		3095.2	1992.4	717.3
25.8	518.2	1233.3		1551.2	927.3	1468.9
888.3	2998	2607.1		1721.9	1365.1	383.3
103.2	3344.3	13957.3		494.9	142.1	147.8
1405	5531.6	350		2423.7	183.6	677.9
307	3345.5	3385.4		9.1	1139.6	359.8
717.3	200.5	1915.5		228	5146.3	1234.1
1669.2	771.6	1222.3		133.8	2597.2	179.1
1803	5094.6	13986.6		1044.3	2022.5	1154.6
1399.2	17.9	4184.2		402.2	825.1	258.6
324.2	3831.9	4881.2		325.6	2678	3042.6
2815.8	3307	385.3		2636.6	815.4	96.6
1331.4	21.6	3151.9		1045.2	4427.4	443.4
702.3	244.7	5967.2		2299.4	2051.5	330.8
2725.6	1090.7	3794.9		573.7	497.6	1622
974.3	3042	777.2		184.2	2377.1	18.3
1449.2	4063.2	2949		2117.4	2641.9	479.4
725	1708.2	2741.4		813	1127.4	1022.5
464.2	4944.2	4115.2		1438.3	6106.1	482.8
648.7	115.4	372.5		704.4	4409.9	170.4
3312.4	3124.4	596.7		537.4	232	819.4
577.7	2672.8	1393.3		427.4	3578.1	983.9
300.1	3942	338.5		118	2484.5	550.5
157	2390.2	3227.9		401.7	1919.6	361.1
698.8	1031.8	223		2355	840.7	9.3
2457.2	8252.9	667.8		554.6	1781.4	1403
577.2	820.2	5567.9		47.1	10548.4	1792.6
149.8	2696.5	1412.3		669	674.4	2145.4
105.9	436.6	6122.3		1241.6	1794.1	476.2
4668.2	4524.2	278.7		419.5	284.5	652.3
46.2	73.2	5334.6		321.6	1384.7	456.6
19.5	2198.8	615.7		1251.7	5194.8	1477.6
91.2	15101.5	1176.7		251.7	1461.2	507
1168.2	4134.4	2319.7		989.9	7197.6	418.5
263.7	871.8	578.6		1907.9	287.3	220.9
958.2	8012.8	1005.5		7027.7	3004	877.9
336.5	748.6	1413.7		1303.1	1552.5	1464.9
1949.9	9382.5	410.8		3143.2	519.2	678.6
387.2	72.1	75.2		308.7	14415.5	373.6
544.5	402.2	153.1		911.3	4264.8	935.7
155.5	2122.7	2948.9		619.1	3838.6	520.7
5450.6	5544.9	1878.9		3395.4	2548.6	389
1849.2	102.4	1529.8		681.1	1202.4	678
779	679.5	717.9		1424.1	3266.4	129.3
301	170.5	1422		2899.5	4945.8	735.7
339.2	704	5332		1421.1	1778.3	73.5
2423.9	424.9	1935.4		1212.3	860.3	1173.5
2511.4	1155.2	2455.1		1598.2	6015.2	1411.4
1263.4	1703.8	5.4		4081	905.2	644.8
166.3	2007	960.3		22.5	755	1192.9
166	4215.7	1080.5		2254.7	287	337.5
2058	955.1	754.4		1443.1	5395.7	606.5
1606.5	796.6	2016.9		351	1074.7	506.2
114.5	2759.9	498.1		1859	2338.4	113.6
64.9	5809.3	2028.4		452.4	690.9	886.3
974.7	762.9	5284.6		1422	524	672.6
285.9	2669.8	6348.7		1056	702.4	2521.4
1204.3	4769.8	2752		63	2032.9	959.7
2523.4	117.3	179.6		5.1	2365.8	254.6
2468.7	1806.9	537.1		511.2	8297.3	266.1
1998.5	1914.7	3957.7		1845.3	674.9	602.5
1174	3925.7	268.8		4273.6	2440.9	1329.4
1516	215.3	341.1		183.8	3515.9	2307.4
193.8	939.8	1473.1		940.7	134.7	886.9
2336.5	3907.5	4252.2		137.4	4302	701.3
639.7	1244.6	1565.3		153.3	283.9	1356.4
860.2	1473.8	859.1		1067.7	3854.7	639.8
3279.5	1489.7	3270		593.9	210.5	62.2
164.5	3595	2018.5		1485.8	1840.7	255.6
1216.5	6556.5	4118.4		147.1	366.1	1819.2
2690.5	107.9	3106.4		428.1	1344.6	1052.3
8.3	1212.3	1706.6		286.5	75.1	456.8
315	178.9	2233.2		385.6	35.2	66.8
717.4	547.8	2143.8		188.1	3463.4	1920.7
986.8	318.5	1385.8		296.5	1562.3	1085.6
1817.1	1164.7	582.3		492.5	1550.1	4102.2
2069.6	1663.6	497.3		1501.4	383	69.9
3360.9	67.1	71		1107	1681.4	2872.4
168.7	178.6	510.2		462.5	1244.6	2426.5
66	1176.9	699.2		512.5	3678.7	184.8
1915.6	149.8	2299.4		202.8	2442.1	2084.1
1513.1	749.1	718.4		572.4	262.8	1729.6
508.2	271.6	8431		1758.2	2178.4	390.7
528.5	2384.5	173.7		3306.2	338.3	1002
1650	248.4	2170.7		1819.8	2354.4	384.9
207.4	31.1	480.5		132.1	335.3	831.3
3847.3	518.4	2182.6		1690.6	5042.3	2316.2
819.2	576.8	3084.5		2962.4	707.2	747.2
492.6	355	945.9		3733.5	3060.7	1768
478.9	545.6	860.6		352.1	219.5	356.3
2096.6	364.3	3750.6		924.7	2239.9	2508.5
1510.6	1163.5	5489.8		363	294	955.6
258.9	992.5	164.5		165.6	309	993.7
37.1	1236	447.6		572.3	2140.9	1081.9
546.4	1308.9	1701.1		1901.4	1069.7	1978.1
1060.9	742.7	14517.4		384.3	3132.1	711.7
403.2	2553.9	119.6		1228.7	2421.9	70.3
525.5	1835.1	1246.6		2084.4	954	3173.1
506.1	2146.7	121.2		1956.1	3713.8	57.5
335.7	305.3	3389		92.7	128.2	1704.4
46.4	169	828.3		106.9	439	64.2
192.2	204.9	1468.2		297.2	3132.9	631.7
178.2	1435.3	1604.4		298.8	2755.5	1278
437	1396.7	1308.3		721.2	1103	893.3
976	1423.5	7925		522.7	1364.8	177.9
355.4	315.3	1372.3		2757.8	2044.9	2362.5
492.8	621.2	6947.8		233.9	976.7	1592
371.3	1633.1	888.6		619.4	4453.1	143.6
109.2	171.9	5822.7		1156.2	1396.8	577.3
39.3	1185.6	1987.3		121.9	311.9	168.3
121.3	137.2	807.5		459.7	757.8	126.1
690.6	2507.3	3356.7		991	2034	1417.3
791.3	480.6	495.3		2545.5	841.4	238.3
22.4	462.8	2906.6		685.4	7350.4	697.8
748.6	355.3	2164.3		2248.6	2462.5	424.8
105.2	1120.2	1702.1		128.2	247.4	799.4
4137.8	2598.2	1006		849.5	2125.5	109.7
62.2	100.2	895.1		1489.7	807.4	2152.8
2170	2305.6	346.9		213.4	567.4	1650.6
294.5	295.3	6570.4		3668	1659.3	1159.8
315.5	39.3	1366.5		38	58.2	353.4
1305.9	284.9	1413.3		405	72.8	208.8
854.7	296.1	2923		1279.9	1027.1	216.3
651.1	729.2	4504.7		55.8	672.5	23
1237.7	2158.7	2507.5		144.2	1642	3061.4
1736.5	398.1	2941.9		230.2	1439.2	2835.6
139.1	689.5	1745.2		646.7	1762.7	91.9
380.3	985.4	3442.3		1078.4	1549.5	146.9
1535.5	603	178.5		2116.8	97.1	878.6
1031.2	601.2	374.6		1785.9	188.4	1176.7
283.6	2518.6	783.7		3174.6	103.5	552.3
133.6	757.7	1872.9		2586.5	291.3	1434
48.2	270.3	2050.4		2098	2932.1	785.4
28.4	875.2	1105		2198.2	50	3705.2
357	889.2	1225.4		457.5	901.8	3116.1
253.6	399.4	574.4		21.1	200.7	41.2
1299.1	304.3	646.8		847.5	463.5	636.9
124.6	60.1	6788.3		133.9	109.2	294.3
514.3	503.7	2089.2		145.5	588.5	1828.3
2065.4	268.7	165.9		1449.1	195.1	495.8
874.8	681.3	580		1416.1	2144.3	1088
1003.7	515.7	1218.6		143.1	340.3	972.1
1383	541.8	1143.7		82.3	320.3	2298.4
813.4	353.2	1926.4		1151.3	739.5	404.4
1642.9	440.6	1492.4		208.5	203.7	727.6
951.5	180.6	966.9		1485.6	698.8	282.4
1468.2	5.5	869.2		2560.3	809.3	1307.8
719.2	9	1262.7		326.1	880	582.9
1274	524.9	329.9		283.7	150.9	326.8
659.6	369.8	76.3		704.1	591.8	2761.1
3420.4	240.7	14.8		695	314.4	447.7
302.3	752.6	3722.3		845.7	303.2	372
346.3	679.5	226.6		848.3	49.6	253.5
893.5	283.1	983.3		1000.5	97.7	338.6
1210.4	259.3	224		2379.8	769.8	1140
1133.6	3200.9	148.4		3762.1	575.3	3131.9
2015.3	73	1355		887.5	1081.9	613.9
148.5	5716.2	285.4		379.9	439.2	1566.1
410	1053.1	669.5		1904.2	1498	525.3
433.3	207.5	402.8		204.1	171.8	407.9
1555.1	943.7	450.8		680.3	253.3	436.5
253.6	1587.2	1909.6		520.2	849.2	1074.5
510.9	4909	188.2		135.5	1066.2	142.5
45.9	416.1	1348.5		273.7	54.8	715.5
144.9	1436.2	288.6		1615.7	519.1	33.9
748.2	2152.1	409.5		963.8	1671.8	1479.5
1671.9	1165.6	2336.1		397.2	82.9	1371.7
1113.7	2046.1	530.3		127.6	2048.1	271.8
61.4	2911.3	2167.7		422.6	1832.9	367.6
2139.4	1609.4	42.3		1488.4	1422.7	745
833.2	1125.8	1152.4		256	1349.4	163.3
328.3	3777.3	2384.1		388.6	357.1	657.2
2745.1	321.2	2045.8		585.4	3985.7	596
45.1	226.7	423.4		201.6	304.5	1013.5
634.7	520.3	199.8		569	628.5	582.3
266.8	317.5	1195.4		534.9	932.5	105.9
523.9	186.9	512.4		63.6	1282.9	135.2
110.9	1029.5	1327		789.4	489	914.4
70.5	821.6	704.5		3494.2	757.8	40.5
319.3	560.3	223		1633.4	975.6	685.1
883	1590.6	987.7		13.8	370.1	755.3
3886.6	768.2	1239.8		198	2323.3	773.6
971.7	2096.3	681.5		28.7	3544.4	195.5
874.4	800.7	42.3		645.8	2563.1	559.7
165.6	636.4	1629.6		485.1	101.5	2853.6
61.6	1941.2	3551		2030.9	436.4	2083.9
82.8	164.6	1357.9		814.1	1015.3	3964
1181.1	191.6	398.3		166.1	1580.9	1305.6
611.5	2048.2	4600.9		58.1	39.4	2816.7
1737.7	562.1	4632.9		207.4	824.2	653
4481.2	1081.6	526		136.6	397.2	166.8
235.2	1414.8	395.5		1035.8	767.7	555.2
125.5	90.4	1525.5		1844	231.7	1746.1
696.2	36.8	725.5		512.5	2319.4	630.7
412	1634.4	671.3		3114.6	1033.4	2006.6
1233.4	342.9	115.2		370.1	183.1	683.9
45.6	540	2955.2		1348.9	181.4	1396.7
2701.8	23.4	606.3		2886.4	754.3	170.9
931.3	41.7	459		551.9	461.2	936.8
277.8	124.8	1800.2		524.5	531.1	473.5
3311.4	383.3	1814		35.3	841.1	64.9
164.3	437.5	459.6		52.2	94.1	2977.2
791.2	59.9	2995		125.4	48.5	996.1
16.1	782.8	591.4		297.7	1553.3	2213.5
2275.3	817.1	1322.4		464.7	94.6	2374.8
858.7	1206.4	3069.8		1271.2	1853.9	874.3
611.2	392.3	17.4		441.9	205.9	1935.2
1537.3	104.4	1783.3		1236	367.9	2021.8
81.6	17.8	2878		1098.5	840.3	1032.2
1248.1	155.5	123.1		518.7	167.7	816.7
350.8	1404.2	539.5		327.3	93.4	412.1
743.9	837.1	742.6		575	2613.2	1697.1
197.5	1129.4	1580		2966	847.4	161.8
1496.7	7.1	1414.3		677.6	425.4	452.2
255.2	132.4	37.8		421.3	964.5	257.6
586.8	43.8	732.8		86.4	283.1	649.2
161.4	962.8	1080.2		173.5	2312.1	425
932.1	191.6	1842.2		59.7	118.2	2571.2
919	290.7	50.5		1372.2	113.6	131.4
78.1	471	2365.5		1221.8	673.9	2103.3
2917.1	1230.4	319.7		1086.5	653.4	1266.1
2476.2	50.5	551.3		406.6	3514.6	1079.3
224	121.5	937.5		308.1	331.1	417.5
371	587.9	2740		585.1	1553.2	2045.6
625.5	122.1	4582.3		660	1114	319.7
637.2	464.2	1291.7		114.9	323.4	585.5
79.1	497	71.3		103.4	219.6	47.7
187.5	297.6	537.8		694.3	276.7	296.6
495.9	248.1	814.3		482.1	639.8	1006
83.5	32.9	220.4		1141.7	727.1	508
94.1	279.8	2847.7		981.6	2490.2	504.3
312.4	166.2	1212.7		301	1814.1	1050.1
1480.4	909.3	46.7		836.3	1304.2	813.4
25.3	205.6	558.9		178.9	789.9	58.4
137.3	338.3	852.7		4683	1703.2	500.1
29.3	380	2918.7		365.1	1289.4	94.7
847.5	318	393.4		229.6	1665.8	1215.2
1022.8	211.7	832.8		198.1	1875.4	2072
485.1	71	42.5		181.9	937.6	741.6
361.9	58.1	126.1		242.3	1399.6	1674.9
320.4	26.1	65.6		750.2	1575.2	1318.7
808	167.5	759.7		288.9	1349	124
308.1	65.2	300.1		1086.2	15.8	697.2
283.6	409.1	358.2		4019.4	1206.2	810.1
497.3	185.9	444		860.9	784.8	586.6
218.6	818.3	1241.7		324.3	963.7	547.9
347.3	323.6	1063.6		700.8	498.1	618.2
388	163.9	1752.7		2322.5	246	454.4
492.1	517.5	668.9		648	485	1966.4
883	1172.7	3092.7		811.2	6740.4	219.3
670.8	67.9	383.1		304.1	727.6	871.5
284.6	24.6	782.8		119.4	280.2	1451.6
163.4	36.4	179.6		833.6	737	602.6
337.4	95.3	916.8		820.7	2911	3398.6
92.6	463.4	1192		958.3	469	720
922.8	50.9	440.6		1439.4	5257.4	156.3
752.1	176.1	612.5		1321.3	1159.2	124.7
377.4	733.6	1218.6		2539.3	653.2	683.3
78.9	232.8	733.5		308	450.2	1318.2
891.8	30.9	295.4		1215.3	215.1	182.8
387	231.4	388		515.8	2583.5	920.4
327.4	91.7	1549.4		737.3	562.8	665.2
690	26.9	137.6		612.2	4753.4	392.6
55	373.9	749.8		323.5	4289.6	454.5
632.2	780.9	139.5		1436.8	4267.8	1364.7
127.1	47.5	43.1		1388.2	7301.6	734.3
1114.9	1302.5	688		493.7	3848.9	751.7
362.9	44.1	188.3		31.5	33.7	1678.1
448.4	17.6	147.7		283.7	1412.9	51.3
410.3	113.1	256.8		156.2	4499.2	443.8
784.4	392.9	1531.9		293.7	1852.5	119.5
32.2	530.3	1120.5		1126.8	425.4	829.5
207	454.1	309		393.4	1712.7	688
53.9	1304.3	445.6		90.2	1448.3	388.8
1438.3	50.6	1571.8		108.3	1147.3	1588.1
270.3	325.6	350		653.3	2327.5	115.3
277.5	615.4	136.9		464.7	205.2	200.3
681.3	65.2	419.1		1065.5	2502.5	1237.1
151.2	263.4	784.6		3442.7	320.5	290.4
1518.9	257.3	649.2		219.1	1309	213.8
594.5	409.9	1866.8		1986.8	1753.1	1173.8
228.5	220	1019.8		2163.5	201.1	374.2
67	859.3	78.4		1419.7	3117.4	549.7
142.2	625.4	71.4		106.6	1412	424.1
140.9	42.9	204.3		49.5	3269.6	297.1
609.4	1275.6	1434.8		779.8	500.6	1620.1
607.2	433.5	1580.8		389.4	1115.4	208.7
47.1	190.6	1047.7		121.9	1482.8	416
1352.9	308	137.4		149.2	5013.5	334.1
264.9	369.9	3411.8		396.2	2740.3	87.3
5.2	318.9	62.2		290.4	3833	1151.8
176.4	510.7	1301.8		1839.5	2835.8	488.8
465.2	1134.2	123		1294.3	4323.4	563.1
206.8	189.4	2633.8		36.4	1624.4	417.6
1083.2	182.9	109.2		254.3	659.6	88.3
384.5	2010.8	1172.2		273.3	2892.4	770.6
64.8	257.6	554.1		189.6	1584.4	155.6
193.3	535.1	655.9		442.6	316.2	130.8
81.2	187.1	489.6		147.9	1810.4	578
35.7	14.1	817.6		273.2	211.8	92.5
245.9	546.4	819.2		109.8	2390.1	556
406.5	606.9	219		2328	948.4	371.7
13.7	145.4	1239		120.5	866.6	493.6
286.9	395.6	750.2		428.3	618.3	355.2
755.5	859.3	122.7		436.5	551.9	1309.4
1074.9	256.5	332.9		571.4	3785.1	828
217.7	857.6	394		84.7	929.6	215.6
149.8	12.4	1149.4		527.8	741	499.1
178.5	654	399.2		596.2	164.1	319.4
89.2	148.6	656		790.3	377.3	121.3
288.2	42.3	1208.9		28.8	4.4	882.3
64.1	219.5	156.9		1477.5	471.1	486.8
754.3	1121.5	2614.4		1047.8	3801.1	177.1
64.2	66.5	838.1		1177	1000.1	794.9
1143.5	50.3	462.3		629.7	744.3	1485.5
294.9	252.8	1210.8		1120.6	365.7	83.6
359.5	447.2	62.3		1200.5	3820	790.9
978.5	1951.2	928.3		1741.7	852.5	334.6
434	237.8	167.3		419	1879.4	334.3
302.4	461.2	818.5		127.5	350.3	294.4
452.3	330.1	48.7		500	258.6	416.2
401	100	203.3		1304	44	44
136.1	537.8	221.2		381.7	167.8	755.3
59.1	95.1	563.8		99.7	1883.3	166.5
409.9	31.1	575.8		1263.3	463.5	103
21.5	243.4	734		1183.8	1921.3	102
74	96.8	482.2		821.4	302.8	1907.6
91.4	100.8	459.2		546.4	960.9	586.8
625.4	231.7	79.8		460.7	922.4	1480.7
22.7	370.6	947.2		30.6	778.7	476.5
42.1	1300.2	225		37.7	3377.5	399.5
21.5	603.9	1123.4		207	359.6	788
61.9	582.6	247.5		92.1	616.1	235.4
49.1	176.1	1032		93.1	839.1	115.2
167.7	171.4	488		1533.4	723.9	1245.5
125	417.7	559.3		1852.2	477.9	844.8
17.7	149.6	37.2		1353.4	223.8	1321.9
227.8	140.8	173		221.2	475.6	433.2
352.3	1140.1	245.8		999.3	793	251.8
57.2	127	767.3		3497.9	516.3	4628.7
431.2	55.4	2295.5		683.2	557.9	541.8
548.8	51.8	1300.4		1174.5	873.5	540
273.4	291.3	286.4		55.8	1326	493.2
338.6	43.8	676		127.7	524.5	2522.5
111.8	168.8	219.4		1695.4	136.3	1158.7
365.1	1325	918.5		552.1	2511.3	1971.6
193.7	388.6	1516.4		711	875	1074.1
38.7	438.8	1398		296.7	729.1	73.7
129.6	653.3	1189		1271.2	3963.5	1506.9
515	261.9	228.7		1213.2	1732	69.6
106.9	115.4	30		1105.7	923.8	230.5
141.2	39	903		1195.1	566.8	1203.2
107	305.4	334.8		159.6	112.5	1617.4
128.8	23.8	909.4		2880.7	4275	540.7
21.6	104.3	771.1		497.3	511.3	89.6
251.1	655.2	226.9		1436.5	104.5	293.4
38.2	310.4	221.6		2800	1619.6	2944.6
185.3	106.3	220		520.4	1160.6	1409.9
51.9	379.1	393.6		1789.2	709.2	348.4
481.8	880.2	676.1		7.9	977	1625.9
72.3	699.6	974.1		407.8	111.4	345.7
149.4	833.1	651		1078.8	897.6	293
305.8	490.8	779.1		369.9	824.8	1367.8
298.7	16.8	128.9		158.3	257	35.4
183.2	66.2	102.6		2482.2	2764.1	315.6
275.7	134.9	684.1		1055.9	1016.4	627.1
533.9	1025.7	2028.7		241.5	1355.3	2817.9
606.9	251.2	753.6		397.4	1227	37.2
279.3	365.3	5161.8		2107.5	284.2	758.3
4	32.2	3719.8		1462	736.8	874.2
289.7	63.9	765.4		7.5	76.3	35.7
909	158.1	2240.3		14.1	789.7	40.3
565.6	27.5	2581.5		442.3	5417.9	1683.4
34.2	618.6	5797		427.3	841.1	1252.6
78.6	1174.5	1293.2		2351.6	510.9	287.2
626.7	251	4347.8		116.7	310.9	65
831	263.2	3693.4		598.7	697.1	30.9
102.5	1006	1704.6		1046.2	297.5	773.6
56.4	654.1	119		157.5	1216.2	1527.9
126.3	55.7	3561.8		457.5	157.1	174.4
140.4	1088.6	10340.6		536.9	1031.5	1096.1
153	337.8	7598.2		187.1	300.8	411.4
102.3	292.6	231.3		1049.8	602	736.4
227.8	277.1	100.1		3465.5	476.5	590
24.5	67.6	923.1		2375.5	284.3	392.6
479.1	708.3	1083.3		239.1	2308.3	252.4
201	101.8	3041.4		331.5	86.9	72.2
121.6	114.7	12586.9		1237.6	6160.6	135.6
383.2	144.9	3593.2		1833.8	143.1	2341.3
589	526.2	315		1904.9	1973.8	370.9
82.3	248.6	4459.9		109.3	1538.2	675.2
180.2	47.8	5128.2		169.4	1690.9	2240.9
28.2	544.6	1501.7		334.6	790.4	1505
298.2	116.2	3643.6		110.6	230.7	271.7
284.6	16.3	7294.2		62.5	2042.2	2444.7
153.1	1309	3407.6		676.7	52.1	1165.7
80.8	101.7	732.8		283.4	2098.4	2401.3
84.4	942.6	2981.1		373	1289.9	1647.7
439.3	604	3149.5		1533.8	70.1	1518.7
250.6	140.3	5513.2		92.8	339.8	1418
57.1	603.6	7101.3		814	1067.7	31.5
174.6	606.5	2483.3		3633.8	170.9	337
51.8	8.1	7493.8		186.4	260.9	930.5
176.5	1022.4	455.1		2724	2250.2	333.5
962.7	579.8	2591.1		1089.2	6085	130.9
26.7	16	85.4		1877.2	2872.7	131.5
176.3	194.6	265.3		813.3	849	2686.5
249.9	126.6	5212.3		629.7	1678.6	1853.3
80.3	309	3416.8		736.7	2432.4	612.4
104.5	473.3	2641.3		273.5	114.2	1624
506.8	691.7	1539.1		2345.4	2661.8	412.4
137.6	256.3	5653.1		1135.6	415.8	735.1
136.5	181.3	2012.3		1302.7	1170.7	182.5
1220.9	979.4	700.3		2074	4533.6	204.5
321.4	1321.5	2570.1		147.1	193.5	61
981.6	24.3	1893.1		409	2948.7	2057.8
95.9	752.1	3298.6		768.1	933.7	202.4
86.9	230.5	7648.7		370.3	2772.7	165.4
280.8	75.3	2590.3		1510.6	520.2	487.3
89.1	331.6	236.9		388.1	1880.3	176.5
175.3	9.9	4188.1		361.8	88.5	1022.5
64	598.8	2583.7		78.5	619.8	2281.7
377.5	673.5	435.9		711.5	1496	188.1
214.5	32.6	2402.2		669.8	149	3535.5
272.5	598	91.1		1248.5	496.2	416.5
253.7	735	2832.7		671.2	5163.6	5521.1
893.9	252.1	9660.6		239.2	2132.8	1643.5
462.5	77.4	312.1		933.6	9442.2	6458.4
946.1	1778.1	3251.9		535.8	160.6	360.8
151	1581.1	3297.9		774.4	194.3	2832.8
159.9	631.7	3482.9		695.8	299.6	2886.2
14	1068.4	373.3		1633	3790.5	144.2
74.2	48.7	1412.1		663.2	652.3	625.4
401.8	757.5	3465		2377.6	2880.9	2995.5
418.8	165.1	2206.2		420.7	204.1	77.1
348.1	329.9	162.3		1559.8	1984.8	1184.2
25.8	370.3	307.7		2044.2	5482.1	293.8
207.9	186.5	245.5		646.5	2358.3	342.2
45.1	23.4	799.7		554.4	3074.3	617.2
264.7	269.9	215.4		1568.8	3651.2	626.1
242.8	910	1335.6		1516.9	4512.8	3084.5
822	960.8	650.8		1562.6	866.5	629.7
225.2	291.5	782.2		1941.5	273	1317.5
230.1	140.2	1496.3		1902.2	3502.4	397
225.9	716.9	973.9		1675.6	4255.7	2790.4
165.8	77.1	131.3		1321.2	3500.5	439.3
585.7	1360.5	1437.2		769.3	3453	434.7
826.3	704.4	247.3		420.9	2026.9	1567.3
815.7	306.3	505		494.8	741.1	256.9
426.2	217.9	282.6		316.4	1446	610.2
430.2	127.1	667.4		554.6	7592.5	865
526.1	466.6	1036.8		850.8	1668.1	830.1
173.1	303.1	611		161.2	70.3	1410.5
42	479	88.1		966.3	70.6	1982.9
106.1	292.6	328		258.6	65.1	509.8
1621.3	615	1060.5		1382.8	131.4	1906.9
118.1	150.7	651.9		430.1	933.8	2079.1
631.4	116.9	1348.6		1180.2	2351.6	2071.1
814.6	59.5	109.7		1491.6	66.7	359.9
702.2	197.6	9.2		339.9	897.3	4408.1
11.3	213	121.5		199	391.2	1042.7
271.5	54.7	396.7		493.4	263.5	1298.2
63	169.4	324.1		113.1	866.7	1563.9
558.6	284.7	273.7		974.6	57.4	1044.3
614.9	351.9	538.3		80.7	913.9	2225.7
109.5	409.9	421.1		955.6	852.3	2456.1
131.3	646.1	270.6		2261.7	49.3	746.9
657.1	123.4	417.9		626.5	32.5	929.4
164.2	330.2	664.5		316.3	1637.2	155.2
853.3	404.3	663.4		243.2	726.4	540.3
1049.1	539.8	20.9		965.6	202	1028.3
414.5	165	366.3		110.9	34.2	282.9
475.8	397.3	126.3		578.7	902.9	714
741.3	471.3	336.3		425.8	189.8	374.3
512.1	434.1	104.9		224.3	82.6	693.8
297	1452.5	93.9		255.1	10.8	962.2
813.6	865.9	1031.2		273.8	1189.9	492.6
94.1	421.3	1785.8		111.5	224.2	6905.7
422	1359.5	414.5		1356.9	156.3	2249.3
209	555.1	930.8		103.5	708.6	559.1
40.7	442.8	327.3		405.8	1166.1	1027.5
165.7	198.3	208.5		1563.2	1910.6	598.8
233.5	141.5	156.5		391.9	802.6	1452.4
108.1	4545.4	206.1		782.8	38.7	2827.6
251.9	592.7	175		1109.1	486.9	1571.5
348.4	2161.8	120.2		602.5	713.3	62.4
979.3	2020.2	230.7		165.6	468	27.1
342.4	446.5	5		317.1	52.5	1790.2
185.3	271.7	322.6		340.6	298.6	764.4
457.4	1201.6	1153.1		2410.1	500.9	1692.5
31.6	253.3	165.5		476.1	1571.5	2417.4
246.9	2249.9	20.1		515.5	461.3	2171.5
342.4	3842.2	560.7		809.5	789.3	1223.9
19.7	1369.7	380.8		1816.3	720.7	1031.1
468.2	7780.9	628		790.7	422.3	375.6
22.3	1455.1	599		1546.2	140.8	526.8
235.5	3914.8	18.2		959.4	792.4	409.1
276.7	1465.9	888.7		345.2	765.9	2211.7
1049.9	283.2	483.8		805.5	959.8	261.8
883.7	2215	293.7		751.4	907.1	953.3
794.7	266.6	732.8		441.7	284.5	814.3
28	319.7	908.4		844.2	95.2	987.5
484.4	970.3	815		658.2	191.6	1109.5
33	464.6	479.4		605.9	45	3690
33.8	2278.8	58		1018	127.8	1013
1070.2	2126.6	1758.3		11	178.9	138.4
23.9	1130.7	965.1		664.9	835.1	3741
434.9	204.9	61.9		76.9	249.8	676.7
94.6	5316.5	157.6		606.8	106.5	4664.5
56.3	2064.7	3466.6		112.6	450.6	425.2
360.9	3094.6	119.2		2570.3	189.1	1598.8
39.6	91.4	398.3		627.3	250.7	97.8
26.5	561.8	951.3		856.1	75	243.2
20.9	62.4	1294.1		875.6	124.1	919.8
487.2	540.6	1425.7		2387	1576.3	1086.2
306.3	818.6	477.3		438.3	379.3	345.5
46.6	1283.3	141.4		570.9	403.5	644.7
13.3	1533.7	1580.7		745.2	1251.3	195.8
237.2	2041.6	1120.2		424	522	2736.7
457.2	1491	17.7		479.5	146.3	1956.8
264.5	61.2	402		487.4	30.4	628.9
431.2	3048.9	1255.1		1004	133.1	2053.5
22.7	1399	245.7		85.5	318.7	1556
168.6	3017.5	277.2		386.4	24.7	757.6
587	2991.4	892		126.4	235.9	1082.7
147.7	827.7	835.4		1522.5	61.7	2462.3
759.6	219.9	824.3		327.8	482.2	111.4
158.1	2351.6	1391.7		380.2	373.4	292.2
68.7	2185.8	119.3		1780.5	121.5	557.1
42.9	5031.9	331.9		1223.9	1303.4	5712.1
307.7	159.4	931.4		1271.9	173.3	802.8
131.3	4018.5	222.3		864.8	21	1232.8
251.4	1250.3	426		1035.4	150.1	166.8
86	1366.6	537.6		279.1	1053.7	6314.8
330.5	2487.6	492.2		738	1841.5	422.6
866.4	999.4	889.6		739.2	297	517.2
277.1	1126.9	190.3		344.3	329.9	168.4
332.4	7267.2	632.9		1965.1	257.2	446.7
227.6	1133.7	212		203.1	305.7	1730.5
20.8	310.4	1025.2		233.6	980.4	269.8
530.7	621.6	301.7		126	779.5	226.4
63.1	200	39.4		108.2	60.9	1530.4
308.2	1026.9	86.1		150.2	486.6	2814
15.5	813.3	14.5		1025.3	213	1331.9
252.3	626.2	563.4		906.6	1080	186.5
37.2	1276	792		645.8	130.2	685.8
77.1	3021.8	1166.1		377.6	1325.1	414.8
140.8	417.3	328.5		331.9	429.6	1489.7
130.6	369	854.2		390.8	495.3	340.5
29.9	541.9	52.5		273.9	1324.4	1986.2
681.7	492.1	353.2		126.1	944.9	1414.2
694.7	2331.4	202		209.2	33.5	1139.6
109.4	539.3	295.6		483.7	103.1	445
318.1	170.6	188.7		1514.4	220.1	1484.8
334.9	2022.4	84.5		299.1	83.3	20.9
1737.4	1115.9	743.8		175.5	140.4	1118.1
337.7	280.7	1195.9		888.2	301.6	9334.4
55.8	3108.8	27.4		201	343	1546
498.8	663.9	2003.5		399.8	246.8	231.2
559.9	326.3	83.4		660.7	237.3	774.7
395.9	242	306.9		913	527.6	15359.5
581.8	595.5	136.9		355.8	256.1	1911
455.5	1765.1	47.2		2430.2	177.4	590.6
509	1347.2	623.2		92.7	709.8	6540.5
55.4	817.2	69.2		739.8	212.8	10173.8
1017.7	82.2	310.7		1786.2	98	505.2
535.6	2263.7	107		623.2	961.6	3096.2
474.8	395.3	672		828.8	805.7	1031.7
730.2	186	14.9		1816.1	781.2	10142.8
506.5	1066.4	610		2432.8	85.4	13303.2
225.3	260	852.2		1735.6	68	134.4
94	27.4	790.7		322.5	230.7	603.6
1538.6	730.8	133.9		424.3	516.4	11013.6
681.9	73.6	275.7		380.2	312.2	3133.4
413.7	234.6	523.2		142.4	453.9	7586.5
1940.3	187.6	173.6		1515.3	222.1	3754.7
174.2	108.9	697.2		348.1	174.8	2992.4
331.1	2146.9	335.4		446	536.3	8986.8
904.2	87.4	140.4		230.8	397.3	10613.9
293.1	120.8	1119.7		167.2	145.8	14446.2
2981.4	352.7	428.1		553.4	256.2	1537.7
45.6	92.2	635.5		140.6	116.5	6989.6
553	1181.6	668		2402.1	1536	10573.4
1339.2	1323.3	194.2		277.2	657.4	1177.2
36.3	543.8	45		703.6	1516.2	2136
1149.6	2291.2	19.1		1842.5	842.3	5174.7
1792	574.1	87.1		178	860.1	1801.1
32.8	910.9	527.9		788.1	35.7	13398.2
431.3	391.4	149.3		436.4	163.8	6375.6
286.3	122.1	56.8		293.7	541.8	3613.7
512.2	1181.4	344.4		812.6	428.6	8284.7
621.3	1507.9	1504.5		1173	497.1	604
90.1	1193.5	2106.9		383.3	193.4	203.1
1575.3	1153.3	342.4		728.1	44.2	124.4
481.1	46.4	155.2		224.1	344	2160.9
86.1	536.4	57.2		9	821.6	2365.2
852.3	164.8	274.6		416.6	1484.7	2582.6
703.1	1443	649.2		1031.6	392	269.8
1362.9	1113.4	275.6		123.3	747	4489.1
27.9	199.7	633.4		32.7	1234.3	3652.2
622.5	842	392.6		147	463.2	9746.1
159.3	243.3	528.7		18.8	163.6	1447.3
88.9	974.5	325.8		567.9	323.5	442.7
97.5	76.9	518.3		1168.2	432.4	1965.8
232.8	970	1078.1		62.9	717.3	6975.7
1012.9	930.8	2020.7		210.7	349	45.3
2428.3	1156.9	257.5		203.4	1269.5	2828.9
179.7	139.8	63.1		317	359.8	2886
788.5	483.9	71.4		580.1	666	1421.2
375.5	469.5	107.3		216.4	688.2	4541.6
289.7	1173.3	44.2		202.1	1019.1	631.7
313.6	680	1840.3		416.4	1152.4	233.5
360.8	451	289.2		324.4	496.6	85.5
1576.3	1849.4	464.1		57.4	527	4413.6
440.5	473.2	93.4		327	485.1	10279.7
1548.1	803	2022.5		886.8	523.8	425.4
75.4	213	118.8		593.3	45.2	566.4
1550.7	933	643.2		927.3	451	3655
1133.4	618.9	425.6		1145.9	164.4	6257.4
127.6	1279.9	753.6		1289.2	205.5	439.8
820	112.8	274		9.9	262.8	7972.1
432.6	129	801.5		32.5	961.8	3340.5
299.9	256.2	165.8		333.5	1710.7	2650.5
1100.8	214.6	432		268.9	667.5	1073.9
398.9	604.5	326.1		1562.6	85.5	2973.5
265.9	1397.6	136.1		196.2	106.8	1350.1
1177.4	785.5	599.9		1529.3	381.8	808.1
449.7	523.4	227		872	880	1033.8
16.3	666.9	479.3		1689.2	170.2	265.3
612.5	52.9	489.2		131.1	206.8	1415.1
1624.8	47.3	1895		1758	350.5	390.9
1069.1	2160.7	219.7		889.1	44.9	620.4
1229.1	155.3	938		2120.6	496.5	1520.3
1706.5	480.5	271.5		80.3	328.2	709.1
1976.8	1751.1	934.7		684.1	292.4	65.5
325.3	413.1	422.5		373.6	296.8	273.9
23.5	396.1	942.5		591.2	353.1	298.3
495.8	161.6	29.3		320.9	99	995.3
590.7	827.5	95.5		318.9	47.8	812.4
769.4	328.8	123		3149.1	10.1	2013.8
485.2	194.5	1309.5		2066.1	557.6	1049.4
17.1	243.4	514.9		755.2	4.7	594.4
157.1	120.9	13.9		203.2	96.5	1045.4
1603.4	928.3	1277.1		1596.7	931.5	214.3
1415.7	2247.3	280.6		1521.3	980.4	248
1031.2	1097.6	227.9		912	107	3513.8
608.2	1263.4	770.2		1772.3	30.9	2584.1
396.5	844.6	164.9		491.5	603.8	521.6
32.5	2340.8	553.6		234.5	502.8	270.4
527.2	576.4	1119.8		131.5	26.1	770.8
287.2	1196.6	7232.5		563.6	250	113.1
55.4	18.7	9676.1		1869.3	763.4	430.2
392.3	113.9	8079.4		2518.2	1506.2	820.5
247	1636.5	486.7		90.1	1231.6	2949.7
1679.2	150.6	1922		296	1228.5	438.7
618.8	2516.6	893.1		213.2	1118.4	1193.9
459	1069.9	4072.9		359.2	860.4	653.2
658	1182.8	9140.1		1759.9	256.3	4463.9
766.8	1921.6	9169.4		783.4	3091.2	1592.6
48.2	182.7	4891.4		362.1	31.5	2663
1344.7	1056.6	1167.4		686	408.6	2203.6
377.8	1075.7	1346		275.7	838.4	2810.4
1443.3	416.4	1106.5		194.5	1341	88.7
60	303.4	928.5		450.4	461.8	1441.6
784.9	148.4	309.1		144.3	474.6	96.3
186.1	63.5	293.5		618.4	93.3	102.3
780.6	2275.7	308.8		557.5	561.4	661.6
248.4	53.6	1599.6		311.4	609.9	586.3
661.2	2084.2	2632.6		438.2	17	3140.6
114.9	779.8	3864.6		237.1	1302.1	2430
1339.4	561.2	201.9		8.2	370.6	1017.3
585.1	57.6	413.8		584.8	471.2	1150.4
1068.1	594.7	1559.5		1004.9	110.5	698.6
1025	1695.5	860.2		59.8	74.4	363.7
1165.2	1071.4	310.4		821.3	813.1	3920.9
716.1	9	559.1		338.6	181	1260.8
1998	1222.3	1291.3		751.4	53.4	508.3
591	565.2	508.5		403.7	1121	1157.1
1516.7	1513.3	1037		312.2	1260.5	4175.7
156.7	104.2	2156.2		1681.2	2799.3	21.7
907.8	3004.4	717.2		42.6	339.9	705.6
1006.9	5237.6	1177.3		1342.8	1743.2	651.9
963.2	1032.2	684.6		1007.4	377.1	1317.6
1180.6	413	257.1		1793.2	112.2	346.4
1232.8	2384.5	590		2162.9	1532.2	1015.2
8.6	2047.8	385.5		999	1479	1137.9
567.7	45	213.7		313.5	3161.1	354.5
125.8	1349.7	2939.9		1550.4	910.2	808
353.2	145	1085.9		463.7	52.5	102
64.2	476.5	389.9		463.3	1185.3	18.6
357.1	466.9	105.9		164.1	1127.1	561.9
388.8	781.6	202.8		138.3	832.3	1832.7
185	2548.9	563.8		286.7	2304	322.3
2794.6	347.1	144.6		1600.4	1870.4	2004.7
152.6	939.3	2894.4		1946.9	4104.8	1112.6
185.9	125.6	1960.2		2613.5	3639.2	5897.8
644.3	607.8	609.4		1652.6	1705.4	161.4
486	2298.3	4953		222.1	1145.2	636.9
104.5	1204	18.8		659.5	3021	464.9
551.1	291.6	2736		4.6	1557.6	1079
658	451.8	2111.2		324.1	1113.3	545.6
1567.8	4424	1987.4		479.4	2823.7	1156
1983.1	20.7	148.9		80	687.6	827.1
6	871.7	2388.4		1313.9	637	623.7
428.4	455.3	948.2		667.6	145.8	856.3
350.9	189.1	1090		857.2	4025.4	525.4
76.3	1793.8	393.3		207.9	2882.8	39.5
141.2	1551.4	4194.2		2630.3	487.6	5976.3
46.9	769.2	979.8		260.9	234.4	4177.8
721.3	4393.7	546.5		93.4	2343.3	743.4
1720.4	3101.3	433.3		189.8	2157.6	4473.4
1729.5	3835.6	335.1		561.3	99.3
3277.7	4896.1	3586.6		66.6	42.6
106.6	702	1132.1		490.7	1619
194.4	1188.3	855.1		2034.8	320.8
1357.1	2395.2	528.9		2176	718
736.3	962.9	3226.3		319.8	1128.4
22.4	2171.1	128.7		70.8	2191.8
694.8	836	2478.6		176	1030.3
615.8	1755.7	2960.9		469.6	1242
1206.3	244.8	839.4		3150.3	5495.2
830	1833.9	5091.6		364.8	3247.9
230.2	1772.2	104.2		1431.5	4230.1
292.8	1441.4	1093.9		204.2	280.7
194.5	2243.2	488.9		557.8	1803.2
1322.3	7077.3	597.9		878.3	492.2
492.7	96.2	817.4		101.1	2051
178.9	284.5	720.9		333.5	953.3
892.5	1238.4	1197.1		929.6	258
200	2380.6	1509.5		800.5	769.5
772	958.2	819.3		351.5	2879.8
93.2	627.8	372.8		203.8	568.2
351.5	1266	3191.8		525.3	482.3
1748.9	118.3	1451		123	117.5
165.8	119.4	1431.5		121.6	798.9
252.9	813.2	1657.7		499.5	1310.7
724.8	269	858.2		526.8	126.6
230.8	383.9	1179.7		504.5	588.8
1189.4	1747.1	245.4		670	1497
1152.6	1530.6	694.5		946.3	1876.4
858.3	1130	1656.6		435.8	683
97.7	864.9	77.6		470.2	1845.4
5052.7	609.3	385.1		754.3	156.2
2382.4	1013.6	1507.3		790	1873.8
275	758.4	37.7		246	1276.2
373	1215.6	1238.1		389.1	1473.5
352.7	330	1471.2		434	552.6
303.1	1852.8	4391.8		1130.7	2238.5
79	368	130.7		1025.2	1338.2
398.9	1104	1568.5		233.2	1157.2
2219.8	1363.2	9.3		934	2817.7
79.3	1108.2	819.8		1189.5	606
1188.8	881	481.1		1102.5	839.4
27.5	3216	2032.7		165.4	1884.7
744.3	1911	517.1		164.6	5591.5
952.9	1104.4	2391.9		820.7	88.6
480.4	1484.7			577.9	499.1
111.3	1154.1			1877.2	714.5
1189.8	436.5			844.8	200.4
96.6	52.1			163.7	1606.2
381.1	217.2			200.3	1746.5
100.8	98			771.4	116.6
279.4	431.1			578.2	500.4
556.2	398.3			87.5	892.7
4138.2	1501.4			41.6	1414.7
255.6	906.2			371.8	809.2
116.5	96.6			638.7	4370.4
13.5	1099.4			324	1730.8
372.2	1283.4			100.3	707.4
858.9	98.6			317	1281
1544.1	337.4			94	306.4
572	310.1			753.6	914.5
374.6	255.8			247.8	4665
553.4	1013			1848.3	1056.6
53.3	2061.2			900.6	436.9
122.4	222.5			659.3	2065.3
75.9	80			879.4	1742.5
160.4	439.4			436.4	1087.5
1383.4	74.1			987.6	547.4
164.2	49.4			1150.6	638.1
353.2	1726.5			1521.3	2593.7
428.4	1579.9			429.7	16.2
588	2383.8			42	304.1
734	599.3			247	25.3
270.6	1698.4			121.5	320.9
2112.1	312.1			203.1	4197.3
819.2	417.9			1122.4	18.6
699.7	1661.9			37.1	4184.7
4121.6	150.5			433	1689.9
182.8	1193			1203.5	338.4
638.8	608.1			42.8	25.7
574.2	62.9			1643.4	2063.2
907.6	761.8			1095.1	955.5
480.8	235.6			1220.4	594.3
3010.1	1030.3			152.4	469.5
170.9	927.5			117	1239.7
518.4	530.1			166.8	602.3
1129.3	439.7			299.3	361.2
184.3	458.6			379.5	1521.8
108	254.3			85.2	1208.8
402	181.1			792.8	1804.1
864.5	370			450.6	614.3
780.6	222.1			1301.3	133.1
232.6	88.1			1139.1	21.7
459.9	409.5			253.9	1271.7
615.4	543.9			55.3	2235.3
438.6	398.2			142.3	646.4
194.9	310.4			439.4	1972.7
205.3	1774.4			945.7	17.5
463.8	1128.3			626.7	43.5
306.7	500.8			666.9	1508.7
407.2	194.1			331	3615
206.1	172.4			119.6	1902.9
969	524.9			53.4	1600.4
611.6	239.4			221.6	961.4
1484.7	1107.1			78.9	581.6
703.3	1242.9			747.8	710.9
650	127.7			67.5	360.5
502.8	231.2			98.2	627.9
216.8	683.4			83.9	1090.8
823.4	753.5			152.8	860.8
386.5	666.4			757.7	490.3
1789.6	2235.7			402.5	92.4
1475.1	507			620	768.6
541	240.2			30.2	576.8
699.9	1867			531.4	2449.3
92.1	2145.5			165.7	2443.3
128.8	1185.6			645.7	2251.9
172.2	120.3			323.1	1400.7
1395.6	98.7			1138.9	1223.2
891.8	221.3			502.3	435.9
562.6	929.5			28.5	974.1
325.2	298.5			176.4	493.1
186.8	482.4			223.4	3687.1
220.4	90.3			511	2556
1057	441.4			7.4	3613.2
768	136.8			943.5	2287.5
337.8	2181			1452.4	175.6
502.6	508.7			316.2	1007.7
774.6	171.7			1156.2	401.3
99.4	428.2			45.7	344.5
734.8	2966.1			671.1	803.7
270.8	2283.9			13.4	599
887.9	709.8			579.8	225.4
1405.7	406.5			333.5	282.6
1614.8	521.6			765.2	721.4
679.4	2210			1520.6	8.8
2299.8	704.5			56	1112.1
224.2	466.9			134.2	916.9
338.6	817.9			854.3	2328.2
349.6	871.9			836.9	638
1005.3	705.4			517.5	526.8
230	971.6			1074.3	1886.2
663.9	337.6			796.7	2687
334.5	1661.3			797.9	1175.4
786.9	100.8			505.2	1076.1
479.8	1539.4			919.5	125.9
252.8	143.9			374	292.3
391.4	167.2			570.6	1576
307.4	293.4			15.7	188.6
1594.9	799.8			42.7	5021.1
370.9	453.7			174.6	5564.9
245.2	1100.3			945.4	665.1
1122.5	65.4			135.5	1851
2372.9	185.9			320.8	583.4
306	371.5			65.8	1027.7
653.4	209.6			861.5	3004.8
172.7	1376.5			257.8	1996.1
133.9	194.3			35	377.8
1014.6	151			365.5	2335.3
2708	2212.1			138.1	1803.7
1620.4	1063			572.5	1708.7
94.7	1885.2			31.2	1204.7
664.1	533.9			671	428.2
899.3	1045.5			394.7	7436.3
86	416.9			187.2	409.9
790.4	2264.8			261.8	796.8
1157.1	61.3			436.8	1846.3
38.6	33.7			585.3	875.8
2357.6	114.1			231.9	1004.6
242.1	475			707.8	2319.3
711.1	966.8			38.4	2038.2
478.4	97.6			462.5	1797.6
216.8	636.7			705.7	1747.3
584	933.3			325.8	307.1
1364.8	1004.7			70.3	2533.6
1224.1	137.6			7.7	595.3
338.8	669.6			335.9	5110.4
481.2	60			962.7	10282.4
183.9	496.6			403.4	339.3
591.6	1878.4			1543.1	719.5
2363	386.2			166.2	840.4
3402.6	250.1			311.7	1127
47.4	131.4			72.9	636.3
3594.2	149.5			269.6	220.9
1218.8	225.9			368.9	792
3848.9	743.8			263.6	161.4
2081.9	58.4			163.1	470.9
4922	614.4			507.4	378.5
954.1	623.1			354.1	2787.7
83.2	86.3			1096.4	852.5
1751.1	25.2			369.9	2605.1
358.2	318.3			350.9	64.4
3428.2	827.2			105.8	2289.6
483.2	1989.2			674.3	201.9
645	212.8			292.6	1246
320.9	409.7			432.2	760.4
1119.5	244.3			1013.3	21.5
80.1	483.7			100.9	528.9
2389.3	1778.4			58.4	347.7
354.2	4139.1			207.6	1433
1694.1	1073.4			11.1	718.8
1494.1	628.7			157.8	342.6
2984.6	87.9			614.9	213.3
103.4	816.4			25.3	1536.5
509.8	1021.8			100.1	2955.6
68.2	3842.7			121.5	3164.8
2282.7	4437.7			32.3	121.2
50.7	1489.6			2831	474.9
359.2	1323.3			557.2	418.1
1517.1	1132.9			127.6	49.7
2011.7	2795.5			244.5	2255.9
989.3	1085.7			447.5	1374.1
847.9	668.6			172.7	833.3
5535.3	350.2			1519.9	578.6
1574.5	685.3			562.2	1197.4
335.6	1088.4			459	1993.4
645	530.9			638.1	57.4
1911.2	482			39.1	1479.3
1525.6	1797.7			731.5	296.2
2954.6	353.9			324.5	588.9
2689	1297			887.8	662.4
4216.4	689.2			880.3	3462.8
1081	4386			697.9	69.6
88.8	3499.1			181.9	2760.8
569.2	846.8			428.7	4696.8
204.6	834.3			613	643
349.4	5812.1			115.8	599.7
2124.8	5924.2			165.9	1627.8
1594.2	160			5.8	1272.3
1392.1	1065.9			163.3	2044.6
1131.9	694.5			1103.9	1422.2
3024	3161.9			256.6	142
190	3834.5			266.1	1701.3
688.9	380.5			1127.7	335
22.9	2467.7			1538.8	150
146.2	1358.4			547.2	1255.9
221.4	995.6			141.4	820.8
965.3	946			891.7	1450
837.3	445.8			652.5	449.1
4010.6	3735.2			901.7	18.8
82.6	337.4			355.2	677.8
347.1	4340.3			211.9	1979.5
3182.6	374.6			53.9	2943.3
3347.8	2978.4			260.7	190
2625.5	161.2			11.9	18.8
1440.9	2424.4			65.7	139.4
438.5	1732.8			299.6	789.6
3526.1	2403.4			59.3	430.9
1426.9	2460			230.9	442.9
2419.4	649.8			166.9	85.3
1043.6	854.6			431.5	37.5
1123.2	499.2			1364.3	68.3
872.3	664.5			408.2	1066.2
750.4	1590.7			187.1	827
123.1	1367.3			19.7	2209
496.2	2446.1			412.9	1567.7
13.7	3708.4			45.4	5907.4
2148.3	254			182.9	1771.2
528.5	906.6			373.8	2370.2
884.4	480.9			317.7	808.5
1222.3	1106.5			97.3	1003.3
1457.6	185.2			238.6	206.7
77.3	362.5			270.7	835.4
960.2	5550.5			1400.2	1372.8
386.7	112			551.8	1721.9
194.8	12934.8			53.7	3408
175.2	4964.6			141.2	3920.7
352.6	2679.7			184	28
953.7	1798.5			2152.7	721.1
455.3	4210.8			386.7	72.2
45.2	2991.9			481.4	216.2
265.6	9392.1			269.1	1906.5
499.3	2863.9			721.6	969.9
47.2	8937.6			11.8	1924.5
338.1	10174.3			330.8	1679.3
1684.3	16765.5			726.8	2933.5
611.5	598.7			60.1	243
2870.8	3801.2			67	2599.4
32.8	6038.2			346.8	1497.6
318.3	1641.6			41.8	2265.2
298.7	5418.4			226.3	406.3
530	1382.9			80	949.2
816.3	755.5			349.2	200.2
1780.8	11365.8			724.2	2988.9
2381.8	3520			285.3	535.8
981.3	3184.9			3142.6	825.4
343.7	4347.1			15.4	425.7
1290.3	2645.8			292.7	129.8
973.1	1669			298.7	457.8
466.7	5423.9			12.6	779.6
215.8	4422.4			392	2631.3
167.4	2446.2			803.4	424.2
1140.8	2669			220.7	3872.2
175.8	675.6			670.9	1044
68.9	6074.2			293.4	3704.8
779.9	4024.2			1147	2622
699.8	1928.8			1993.2	2883.6
170.1	6425.6			429.5	372.1
1007.2	3010.8			204.2	1290.2
1226.9	2969.9			420.7	1473.6
1561.5	1565.3			78	455.7
1094.4	4298.2			718.5	541
1089.7	3655.4			188.1	2894
733.2	8778.6			102.4	541.2
346.1	1174.4			519.7	5374.2
1276.5	40.5			490.5	6873.8
9.1	419.8			1091	1336.6
72.8	710.8			1070.7	2426.5
3451	41.9			687.4	124.3
3850.1	1705.2			576.5	447.9
655.5	2951.5			2755.7	841
505.1	85.8			1909.4	127.6
859.4	412.2			5822.7	479.2
161.5	2355.6			1877.9	3062
1312.1	1235.5			1001	3276.6
1180.1	5075.3			637.2	3394
814	19.8			608.4	1451.8
384.6	807.2			1236.2	958.1
256.9	401			4920.7	443.1
814.3	908.6			2765.8	4570.2
376.3	730.6			4005.3	1118.2
38	1200.7			484.3	755
202.6	2115.2			7404.4	2212.6
315.4	915.5			1125.6	577.2
418.7	977.4			1615.4	1997.2
1801.9	937.8			6428.5	3644.3
2568.3	1465.2			8620.8	2653.8
367.2	1454.4			1242.7	594.9
105	787			3568.6	1549.9
1167.9	124			411.6	172.5
275.8	215.7			5883	1526.3
66.8	264.8			1703.2	2761.6
827.3	1606.8			1626.2	4104.5
388.1	2395.4			3489.7	832.9
214.4	4565.5			786.3	5311.8
497.3	548.8			5606.7	556
77.8	3372.8			7312.8	196.3
522.6	516.2			165.3	454.4
549.6	752.4			2228.3	1540.9
1082	1186.7			449.3	1167.7
772.8	689.5			4853.7	279
450.1	4107.8			2915.7	463.4
361.7	1302.7			941.8	1841.2
228.4	300.9			731	1171.7
1856.8	2920.8			997.7	982.7
364.8	466.1			227.2	2859.7
166.9	65.8			1652.9	835.3
592.6	1392.5			835.4	849.3
663.8	1078.1			92.5	6476.9
11.2	138.6			286.1	1273.8
709.8	130.9			276.6	67.6
37.1	36.7			1899.7	1244.5
846.3	1273.1			2071.8	2619.1
412.8	5076.9			2051.2	480
783.8	507.2			120.5	710.5
243.6	1377.8			1019.2	62.8
807.5	1487.3			3384.6	5061.3
43.4	1330.4			1613.4	497.9
233.3	1650.9			490.2	5029.7
683.7	4893.6			138.7	14502.5
223.7	1001.3			2170.5	1282.7
434.1	439.5			197.6	1094.5
371.4	720.5			776.3	178.8
474.2	4091.7			3152.7	1154.2
922.8	414			603.2	6905.3
638.8	828.1			897	1215.2
510.8	304.8			266.3	2500.6
12.6	403.1			343.7	8929.7
678.5	185.1			92.8	239.7
1625.7	108.8			1583.9	12979
570.3	646.2			342.2	2640.6
293.9	1593.4			1479.6	3447
824.4	1247.1			891.5	453.4
254.9	47.1			1594.1	4321.3
381.3	879.4			785.2	3241.6
1273.5	1382.6			3453	3854.2
391.8	295.2			1219.7	3469.2
984	1782.8			119	759.3
331.1	78.5			957.2	4314.7
181.1	2885.4			3525.9	4042.5
852	2526.8			964.4	4417.7
188.2	48.8			978.4	1964.5
379.3	2239.9			2035.4	1289.5
495.3	359.3			313.1	55.4
264.8	118.2			263.1	4378.1
310.3	509.8			190.8
1855.6	84.4			1301.2
64.1	9.9			247
48.7	31.4			2556.8
661.3	945.1			574.3
166.3	615.4			2757.9
315	42.6			717.4
317.2	65.9			357.4
731.4	1306.2			78
1125.8	1286.4			923.9
7.9	540.8			1503.4
1015.5	761.7			1801.4
1183.8	3528.4			389.8
905.6	304.1			284.7
649	250.9			582.5
599.2	22.5			1525.5
269.8	9386.8			1477.4
44.4	5334			204.6
299	8986.7			214.9
572.2	4568			481.4
55.2	5458			1300.4
500.3	3411.8			205.1
1885.9	2790.2			2501.4
73.2	7261.2			1218.3
2309.5	3513.4			136
1183.5	14460.6			1873.6
1392.4	4677.1			11.4
1762.8	984.4			405.2
555.5	9183.7			276.8
47.7				138.7
233				274.5
1026.7				459.2
912.2				4065.4
380				175.1
168.3				810.2
129.2				992.3
631.1				739.6
407.5				934
546.1				237.5
839.1				155
1997.6				926.9
84.6				189.2
426.9				426.6
2958.4				1199.2
416.2				1021.2
1754				1280
1380.9				130.5
453.4				912.6
1397.7				2109.9
197.7				652
479.6				1466.2
371.2				249.2
67.4				827.1
754.4				358.7
1343.6				2000.8
86.1				1765.5
292.2				750.5
1251.1				2479.3
1088.2				234.1
762.1				296.6
496.4				1747.6
2324.6				3319.2
318				669.7
450.4				260.4
722.2				211.3
1092.4				1387.8
371.2				4376.7
165.8				343
2273.7				724.9
404.4				2288
300.4				4762.1
1993.8				519.6
176.8				545.5
734.1				1013.4
487.8				2351.4
417.6				174.2
144.7				629.2
1034.6				859.9
648.1				1651.8
1181.9				307.1
59.3				82.2
968.1				1872.5
92				561.3
523.1				577.2
1019.9				196.4
188.3				986.4
385.2				3220.5
1523.4				718.7
485.9				1263
595.3				596.6
52.6				1255
643.8				941.1
279.5				3505.9
2470.8				1659.1
389.6				4217.6
384.5				633.5
2015.6				766.1
2446.3				447.4
643.1				362.9
586.2				365.2
1271				1761.6
1412.8				654
744				3442.1
1189.1				199.9
1624.3				1797.6
1021.3				225.8
515.7				457.2
1415.7				903
108.1				4628.2
254.2				61.6
630				108.8
1641				1232.2
425.2				541.9
1954.4				1752.1
204.3				266.2
514.3				1212.2
277.5				1528.9
228				797.1
1369.6				7662.4
326				5580.8
119.9				792
1599.8				1354.8
110.5				2231.7
1820.2				1880
485.6				561.8
233.2				1303
610.4				18.4
360.1				323.5
3251.4				1723.8
2319.4				611
285.9				727.3
24.2				178.1
239				2295.4
157.7				56.5
903.9				248.4
2886.3				122.7
115.6				9.1
1481.4				314.4
1195.4				1391.8
49.8				49.2
853.6				959.3
447.5				901.2
299.1				348.9
2565				722.1
632.6				169.1
415.6				3458.8
235.6				964.3
3748.8				1857.6
1431				2099.8
244.6				66.6
701.5				2119.2
273.5				496.9
260.8				1029.3
1765.7				149.9
2072.9				297
1640.2				1957.8
482.6				61.6
794.5				722.1
376.4				355.8
1379.1				2502.6
833.6				1691.9
111.2				1929.7
1263.8				3640.4
1105.8				4486.5
62.8				698.4
981.3				226.5
345.6				1059.5
56.6				1118
571				1939.9
3292.3				8604.5
624.5				3338
43.3				408.2
910.5				561.6
189.5				1989.3
414.6				2729.8
281.3				623
70.7				6415.7
1628.5				173.2
336.7				6494.8
193.6				2677.8
523.3				1712.6
384.2				5344.6
580.1				576.7
1234.6				1068.1
1151.4				9647.2
90				3270.5
860.5				1417.4
357.6				132.8
226.8				511.2
608.3				2316.2
1807.2				1135.7
836.9				243.8
444.3				95.9
474.9				2007.4
112.5				3638.2
244				5444.1
1524.4				265.5
185.7				2078
699.5				229.9
372.8				2061
846.6				2487.7
1195.5				6125.3
21.2				233.5
420.4				91.5
764.5				14
731.9				163.2
1825.4				74.2
2094.6				79.3
1072.2				46.7
439.8				17.3
1051.7				151.8
1226.3				136.3
138.6				509.8
303.8				503.9
25.6				24.6
449.1				706.2
478.8				1038.3
897.3				160.2
212.3				575.4
844.2				493.6
205.4				35
1679.1				760
3780				69.5
403.5				267.8
360.6				1008.7
587.5				310.9
173.3				38.3
332.7				93.3
513.4				60.9
167.6				517
96.8				833.4
149				550.9
169.4				94.5
219.7				83.3
807.6				1165.6
184.4				114.8
487.8				567.6
232				1175.7
617.1				498.8
137.2				627.9
280.3				467.8
106.4				254.5
112.5				344.7
903				788.7
2114.4				419.8
1021				16.8
771.1				449.4
316.4				577.4
645.1				151.8
215.2				110.2
191.2				254
1030.6				226.3
203.8				355.3
873.7				790.4
1118.9				340.1
484.6				79
132.9				72.1
1021.1				1307.4
361.9				48.1
504.1				135.8
572.8				563.1
818.2				684.4
393				601.9
111.6				294.3
138.2				52.3
892.5				253.6
34.2				805.2
941.4				363.9
115.2				303.4
103.8				365.5
763.2				30.8
1162.8				602.5
597.1				122.9
1353.2				295.6
124.7				70.9
1075.2				48.7
41.6				376.2
378.8				183.7
1098.2				153.7
275.3				654.4
524.5				101.1
998				728.3
364.1				363.5
101.9				291.4
1513				637.3
44.1				849.9
133.9				354.3
1282				249.8
577.2				72.9
1543.2				311.6
671.4				176.8
84.5				282.8
45.2				729.9
719				181.7
977.9				1104.8
30.4				490.6
191.1				624
104.7				102.8
1193.2				69.2
285.9				94.1
38.3				170.8
527.8				206.5
186.6				204.3
102.2				148.8
326.4				291
665.9				140.9
1126.3				160.6
344.2				372.5
187.8				843.5
188				84.3
281.3				1432.6
193.1				59.8
793.2				542.4
140.4				718.6
1432				158.4
572.8				202.9
23.2				407.2
718.4				72.1
554.5				138.6
187.5				658.3
912.1				1024.7
198.1				9.6
308.7				981.4
134.5				704.2
664.8				1132.6
101.4				505.4
666.6				119.5
287.3				436.9
621.6				369.5
77.2				114.3
607.5				105.2
360.2				653.9
459.7				22.2
470.7				185.2
60.2				977.6
1007.4				54.3
740.7				1172.7
968.1				413.6
990.8				222.2
311.8				132.7
791.5				131.4
433.4				1524.7
542				354.5
453.3				457.8
730				753.5
580.3				295.4
60.8				1140.2
146.7				941.7
643.4				443.5
74.6				258.9
694.2				414
782.9				343
161.2				272.2
1035.4				280.8
794.7				66.5
260.7				551.6
488				264.8
1345.4				1291.6
127				40.8
1278.6				288.6
1920.8				846.7
521.1				60.8
348.4				763
649.9				131.2
254.3				400.1
29.8				1293.5
914.8				354.5
236.8				1019.1
194.7				1367.1
90.7				1147.4
33.8				4.8
337.2				58.7
631.4				1630.2
320.1				102.6
2370.5				380
210.8				51.6
375.2				1420
3874.6				46.3
3253.1				76.9
303.4				1173.4
348.9				236.5
6022.6				347.5
4561				875.3
3399				750.4
769.9				109.8
1378				3191.9
249.7				391.5
768.3				131.8
1392				37.1
45.2				1029.6
2524.4				34.5
5575.2				519.3
3241.4				76.3
416.2				206.4
466.8				916.8
1547.6				674.7
377.6				332
4674.3				388.8
399.9				1063.4
4000.5				399.7
2415				239.5
3107.4				313.4
414.9				1142.4
2258.7				164.3
568.1				428.6
1530.9				100.6
2363.9				59.9
1408.4				255.7
2248.5				2069.6
1932.3				228.9
2795.1				44.5
8798.3				1219
938.2				361.4
1128				13.1
425.7				66.5
586.4				236.4
1570.8				156.9
478.1				923.8
1210.1				1126.4
986.6				748
898				385.9
753.8				371
1704.9				126.9
223.8				6.4
307.9				306.7
2657.3				291.5
145.3				834.2
6376				122.9
2810.2				436.3
628.8				86.5
1511.2				358.1
1380.8				923.2
910				1344.4
1124.8				176.8
18.5				434.2
495.2				451.6
73.7				81.2
353.4				167.1
607.1				855.5
199.5				143.6
232.3				117.4
619.9				145.3
402.6				48.5
360.8				342.7
201.9				247.1
609.5				220
250.5				30.8
105.7				59.9
273.8				2559.1
480				227.6
851.5				156.5
629.4				1556
87.9				283.7
774.9				84.3
74.4				572
1393.5				1129.8
324.3				999.3
562.1				541.1
96.8				490.7
518.1				203.9
2854.2				1211.4
257.3				841.3
225.8				1313.8
291.6
268.7
136.7
224
2110.9
1540.7
704.5
333.6
23.7
599.6
1194
279.2
545.9
77.8
80.2
1091.4
721
105.4
2317.1
581.3
749.1
91.5
70.1
257
769.6
266.4
674.3
745.4
56.2
460.3
206.4
534
184.5
128
382.2
19.9
151.1
646.7
17.5
1518.5
566.9
915.7
120
142.9
114.9
70.6
151.8
1090.1
83.2
292.5
738
97.8
214.3
319.8
865.5
504.6
246.4
481.4
716.8
1156.7
731.4
214.5
132
1069.9
1345.1
758
202
189.7
1595.7
209
67.2
1246.8
233.3
34.6
594.3
889.1
221.3
441.7
167.5
620.2
628
486.4
494.8
410.5
60.3
210.2
166
160.3
220.5
135.1
349.1
16.4
72.7
437.2
175.2
244.8
46.5
388.8
572.5
352.2
329.5
469.2
2071.5
422.8
100.5
909
59.8
32.8
460.7
310.4
131.5
250.8
127.9
54.1
1246.8
311.6
111.4
2182.7
83.7
1493.2
562.7
32.5
1108.7
226.5
462.3
709.5
583.8
107.3
260.7
972.7
354.9
983.9
146.9
859.4
40.3
1223.7
346.5
88.7
1139.9
1136.5
303.2
360.2
257.1
831.2
1129.6
405.3
1137
795
575.5
516.7
689.2
365.5
799
135.3
77.9
48.1
815.4
29.4
397.4
439.4
66.5
55.9
1433.2
53.5
23
887.8
388.9
752.2
18.9
183.3
197.3
1506
319.8
41.5
527.3
93.8
68.3
291.2
15.4
371.7
643.2
229.7
1505.6
200.2
216.3
508.4
1983.9
142.1
1976
14.6
343.7
565.7
1184.4
304.1
131.2
289.9
340.4
22.4
778.9
186.6
627.2
308.5
494.6
172.4
638.1
373.2
649.1
643.8
715.3
63.2
4400.7
3015.3
2000.4
374.6
1312.4
726.1
1186.2
1012.9
3075.7
764.5
278.6
1833.4
503.4
[truncated: 77 more rows]

## Sheet: Figure4E
	GFP-				GFP+					INSET
Bin	+/+	+/RC	+/GS		+/+	+/RC	+/GS			GFP-				GFP+
5	53.6867	41.6232	57.9218		51.4077	48.9703	52.694			+/+	+/RC	+/GS		+/+	+/RC	+/GS
10	29.1084	34.5495	30.9671		33.3333	35.9268	33.2974			13.3677	13.7424	6.00004		9.30548	5.7881	7.94272
15	9.10843	13.7007	6.99588		10.1914	10.6789	9.69828			6.55865	6.28562	7.05887		11.346	5.67677	5.5164
20	3.46988	6.32911	2.6749		2.75901	3.27994	2.69397			7.26994	15.774	7.05438		12.3255	27.3519	8.72789
25	2.26506	2.82949	1.23457		1.68919	0.915332	0.862069			13.6497	8.7487	5.87708		5.06123	5.9687	10.1885
30	1.10843	0.670141	0.205761		0.281532	0.228833	0.646552			5.35847	11.1158	5.01034		23.1119	13.8604	6.50825
35	0.819277	0.297841	0		0.225225	0	0.107759			9.41164	14.5305	5.07711		7.38167	20.6717	6.51796
40	0.192771	0	0		0.0563063	0	0			11.9853	5.47583	6.4292		8.43814	13.9465	5.87687
45	0.144578	0	0		0.0563063	0	0			10.1305	9.2741	24.1549		22.7378	7.18443	7.96089
50	0.0963855	0	0		0	0	0			7.28603	10.933	5.1837		17.1807	7.16155	12.2145
										5.48337	6.21419	6.48728		11.1383	8.64362	5.73309
										17.6774	17.7108	7.06253		6.43006	6.40445	5.99115
										7.29691	5.5502	5.28655		5.66916	9.59596	8.14851
										15.2863	12.4635	5.16712		5.88905	5.68596	5.60208
										6.06135	5.63365	5.55322		9.33571	6.48005	11.9518
										6.92549	6.03929	6.73266		5.70401	6.86971	5.83043
										11.0426	5.62518	10.7379		10.5383	9.04464	13.2245
										9.55553	9.87461	5.59362		7.85898	17.9767	5.87824
										5.28039	8.10663	9.14594		7.5625	9.30793	8.83307
										5.14601	13.0141	5.23384		10.2419	14.2759	5.15579
										6.96514	11.3773	6.56992		9.16054	7.48916	5.75766
										10.5267	5.81138	5.67398		7.16741	9.57488	15.8179
										7.37344	5.76514	5.98201		16.5898	9.16081	20.1356
										9.46243	14.9686	6.30235		8.23933	7.7822	7.888
										7.23787	6.55675	7.02108		5.89448	6.59757	11.9028
										8.04838	12.9366	8.84161		10.0098	5.21503	5.14291
										11.0295	12.2755	18.5727		11.7759	7.41725	7.4549
										5.28125	7.8513	5.654		8.74356	5.59266	5.68242
										6.80564	6.98919	6.24911		7.35034	9.54116	7.49247
										18.819	7.36516	5.93285		8.4918	12.2858	9.06558
										9.34122	18.2924	6.21937		5.22606	13.1395	7.83155
										7.00335	5.39858	5.99769		5.45317	7.55943	5.47275
										13.981	31.1296	5.84603		8.39997	19.7229	16.0305
										8.07957	22.8479	6.6824		6.22824	9.18717	14.2083
										8.38614	5.66742	5.04615		15.9402	11.4523	5.03225
										6.28154	11.937	11.4595		10.9502	5.60082	8.92649
										5.52931	18.4871	5.83391		9.17342	5.12544	12.5847
										10.8634	10.7571	5.42615		11.8189	16.6504	6.23368
										5.51158	12.0112	9.05324		7.62433	6.22169	9.68192
										5.4605	14.496	5.86759		6.43372	5.72889	17.16
										13.7429	10.4653	6.37319		5.842	13.8019	5.20324
										6.22194	10.5085	6.11842		15.6575	11.8764	8.50407
										14.5694	12.9206	7.48431		12.6388	6.28041	11.8707
										11.2121	17.2446	7.68323		11.6403	7.71439	8.77104
										10.8096	9.08437	6.43438		11.7244	7.68289	10.2894
										5.01148	24.5304	5.01389		6.16315	7.75522	20.5401
										10.279	16.0708	7.79647		5.87673	6.1256	8.9795
										11.8428	12.1655	6.54826		15.9896	5.67232	6.17416
										7.12763	5.46031	6.9243		16.3679	12.8668	5.55725
										14.6765	10.4782	6.01137		8.62533	7.16843	6.31658
										12.1708	5.24371	7.67618		12.3018	6.16779	11.1223
										6.46852	12.8764	5.51107		5.8116	5.39824	8.91982
										11.784	8.36419	6.20859		9.42952	13.3	8.61417
										5.63583	19.3988	8.23253		8.13915	15.1765	21.6649
										8.07884	5.29361	8.60245		5.82358	7.71747	18.5611
										11.9748	11.9382	6.60276		5.95733	5.52325	6.31759
										11.4577	6.47463	5.08595		7.5831	6.76038	17.5176
										8.92047	5.62649	6.47252		6.30828	8.60549	6.01071
										12.6666	5.13073	8.87993		5.76142	6.23062	7.87757
										7.10292	7.88677	7.28004		7.75473	18.2141	5.61177
										9.97616	5.31945	6.34663		6.32755	16.6906	9.22511
										10.4222	9.5199	6.24158		13.0729	10.2817	6.72928
										7.6266	8.02596	7.36019		5.93691	7.41158	6.1691
										5.0625	6.49525	5.07277		7.7104	13.8089	7.78095
										5.44887	11.9989	7.15294		6.83877	6.9998	6.43054
										7.0866	5.19273	7.46137		6.83245	16.5509	9.03117
										11.6923	6.95229	14.7215		10.0007	16.3539	10.4199
										24.5893	9.72537	5.70224		5.99642	6.76427	6.81144
										8.55765	10.6199	6.76834		13.1474	6.84133	6.15711
										11.8002	7.7468	5.22284		15.0568	11.0872	5.97523
										5.82136	6.43421	5.6192		13.2355	10.9522	11.5206
										5.52709	11.6535	13.31		8.98003	8.51159	7.26006
										6.50926	5.19632	5.52795		11.4644	5.15038	6.39445
										7.19251	23.9017	8.78047		5.25269	5.48466	5.26755
										5.65196	5.08318	5.832		6.87162	6.99593	11.3568
										7.09201	5.00766	11.3021		8.37559	5.99153	5.02487
										7.52214	8.61271	5.37592		8.37435	5.67193	9.27274
										9.2534	10.3852	14.8736		9.96206	9.21976	5.20698
										5.58993	11.0646	9.65409		5.7535	5.88484	12.6205
										8.88156	14.8707	13.6856		16.2334	5.63307	9.02059
										6.88399	5.45976	9.45355		9.19138	6.625	15.8517
										8.96959	8.93601	5.15003		6.67091	5.23757	6.604
										5.18084	8.01443	9.21016		11.8547	6.03122	5.32543
										12.8924	7.2779	7.2925		15.0596	5.56798	13.0789
										7.99293	6.30434	7.15255		13.9907	8.19796	15.669
										7.32017	7.33597	7.46454		8.01931	7.46652	6.3512
										11.7985	17.7612	6.08622		7.705	6.17363	6.42883
										6.82125	15.2127	7.71942		5.56729	8.67347	7.1887
										8.48113	7.00721	5.04876		16.8993	5.91937	7.75117
										20.3249	8.25884	5.36825		9.80572	5.75393	6.50685
										5.05336	8.45949	26.7065		13.8071	9.6463	12.2057
										5.24204	11.6812	6.08306		10.4337	7.57669	13.5157
										9.19443	18.4063	5.75432		5.47006	8.35409	6.68842
										10.7086	5.06645	6.38747		14.1027	8.23286	9.36335
										8.05355	6.17993	11.2908		9.58543	32.3023	8.52457
										10.043	12.7966	10.4997		22.1776	9.93065	9.34192
										11.6045	16.8253	8.00745		18.0659	10.3626	10.7553
										8.42922	10.4857	8.08834		10.39	8.01462	7.66864
										10.254	6.51687	8.60207		6.61481	20.6111	6.92026
										9.19127	13.5332	5.84708		16.4767	5.31003	12.0749
										7.53363	8.13022	10.7532		11.5068	5.42247	13.697
										14.2741	5.96957	5.00549		9.74516	5.05836	10.7082
										9.63449	13.6443	5.19525		24.356	10.1445	5.65229
										6.01896	15.5865	7.99555		7.39248	5.42173	6.16822
										5.2094	12.7935	6.37744		8.52049	6.87776	7.6992
										7.22392	8.75244	17.8114		20.0321	11.7756	5.73363
										9.6757	8.16804	5.95042		5.73025	13.799	5.35604
										9.38666	7.41824	7.66803		9.8938	7.15098	7.04649
										10.8577	10.4053	7.04902		6.08447	5.22415	11.9865
										5.05059	18.2671	5.53056		5.0465	5.13974	5.43299
										9.73607	15.6695	5.9489		17.0246	5.30287	9.70732
										8.39303	5.17091	6.08777		7.35867	8.25108	5.34843
										12.3958	5.19969	6.22944		5.4106	16.0548	7.00337
										7.97536	8.49076	5.25325		6.26994	5.59129	5.36237
										8.0487	7.69865	7.22168		7.53113	5.48549	5.2542
										6.69211	5.20442	6.13363		8.96939	5.88191	6.08608
										13.7387	15.8255	7.79222		9.04671	10.6385	6.249
										5.2836	23.5578	9.2594		7.68087	5.11365	7.88752
										7.51702	11.1477	6.90878		9.70907	6.18042	5.08226
										10.2685	12.1607	6.50876		5.78695	5.00282	5.10711
										5.27747	21.2296	10.2594		8.2757	5.57946	7.3385
										12.4328	7.08378	9.7547		6.46245	9.43088	5.92795
										16.3768	5.27785	5.90082		5.30838	6.06544	7.61999
										10.4852	5.03667	6.87612		9.56286	12.8316	5.83281
										5.01427	6.22499	5.5123		7.43551	10.1032	5.4863
										9.59017	9.63076	5.94564		11.572	5.7424	6.25217
										15.1107	8.28868	6.33086		13.1459	5.60038	8.67793
										11.7969	9.22095	8.24876		7.991	15.9888	6.55751
										7.49297	5.42751	7.27307		5.2397	5.97208	7.66009
										9.6907	5.66919	7.21362		5.8594	8.26084	5.02369
										5.46251	7.86404	6.36133		8.91375	5.85473	7.20345
										8.22616	5.20911	10.0669		7.40866	7.47201	5.01056
										12.7216	18.4725	5.80459		10.3046	7.1744	8.17632
										9.2528	7.08998	7.96697		5.70338	19.4879	5.95929
										9.85471	17.1659	12.0571		16.5624	8.20384	5.393
										19.0454	5.49704	6.79736		12.332	10.1635	6.22329
										5.80453	16.1039	8.70763		6.5565	6.43814	5.02366
										5.36658	11.6036	6.93081		8.558	11.8551	6.16387
										5.05249	9.10147	10.3815		6.10688	9.33259	5.95663
										6.97465	5.551	6.85544		5.99648	5.78157	9.67138
										12.2498	5.20661	5.02889		6.85072	6.33939	6.24598
										5.33881	19.6082	6.28599		6.3312	11.4978	7.41836
										11.3806	10.8488	14.2248		13.7368	7.96847	5.22881
										6.74839	11.0233	6.91974		5.9474	6.96733	6.70864
										6.78193	10.3372	5.60975		5.70407	6.69035	6.54238
										6.71204	16.4075	8.95613		5.99812	5.44399	6.42447
										6.14365	7.96766	16.6613		5.34992	9.27607	6.64233
										9.71559	15.069	5.65364		6.57611	8.61699	5.28855
										12.1086	9.73359	14.3953		18.1303	7.75131	7.72513
										5.216	27.1363	10.8533		8.18095	16.796	6.25812
										6.15113	17.4982	6.28228		10.3593	6.47292	5.39682
										5.83643	16.8993	5.425		8.62861	17.2403	7.20978
										6.78296	8.55057	5.1518		5.75858	8.42848	5.96479
										5.28719	5.37538	6.11059		8.52514	5.57085	6.53837
										5.3009	14.9943	9.3485		14.979	7.8378	5.32502
										9.20633	13.414	11.9098		6.5195	5.00487	9.0673
										14.5062	6.0078	6.32051		6.7072	7.19962	9.0032
										7.39433	6.3686	6.31353		18.2168	5.5181	6.78826
										8.63885	7.09469	5.31646		16.1029	7.0749	5.99409
										6.94834	5.08749	10.5312		6.55485	7.16136	7.64914
										5.2266	14.484	10.0115		10.9287	9.79342	5.95313
										9.52757	5.55174	5.04916		12.0382	5.79192	5.97783
										18.2677	6.12367	5.89191		7.06342	6.4097	5.81224
										8.59189	14.6256	6.29371		10.2017	14.2764	6.70023
										6.24345	6.96398	8.74841		8.91605	10.402	5.51093
										20.6601	7.31705	9.25906		13.098	17.2333	12.3966
										12.6313	8.26394	5.58576		11.2581	5.54767	5.36213
										5.36657	9.02891	5.28867		8.093	6.18207	10.5866
										17.6632	9.39558	14.5906		5.09963	6.96709	6.3415
										15.0879	22.535	23.2874		5.24753	5.61724	5.19823
										8.34293	14.884	8.47357		16.591	13.9162	6.21847
										9.85458	5.57894	6.03406		12.0676	6.54032	6.19384
										8.20304	5.2076	6.40807		7.26289	5.3316	5.62102
										5.84269	12.5637	6.84687		6.54964	10.2576	7.06741
										7.37393	14.7552	7.32427		6.69498	16.9715	11.2616
										13.9935	11.8016	7.10534		9.06067	19.9753	11.5265
										6.84348	6.5009	5.52331		11.8355	5.76044	6.93861
										5.12884	8.13037	5.47057		6.76126	7.52327	6.42765
										14.8759	8.37971	7.43217		7.94332	9.6341	8.24416
										9.46581	6.67864	6.71511		5.15674	13.0311	5.86116
										11.3235	11.627	6.50133		11.145	6.15083	5.75375
										11.1106	9.19021	7.55882		9.11773	8.02597	5.31652
										6.61938	18.7098	7.25875		17.7677	8.33303	12.2191
										8.2887	12.8317	6.0052		6.67631	7.50323	9.28728
										6.95953	11.0465	7.92827		5.36035	11.6988	8.55288
										12.3042	19.0283	6.89245		6.09593	7.2681	5.69153
										5.51785	21.359	11.0518		5.83718	6.10112	13.1941
										9.87107	20.8623	7.41802		5.01236	6.43019	6.34133
										17.2955	6.68524	11.8886		8.31271	6.65329	6.76426
										17.312	12.0149	5.12576		9.57089	6.6358	12.5591
										10.8921	7.10559	5.76357		5.59075	22.6482	7.57156
										6.31503	6.3725	7.55742		10.6396	5.46064	9.06412
										7.12703	8.95513	7.01835		20.4952	6.75688	5.64323
										22.4179	6.62266	5.23879		6.65778	11.6895	6.6455
										6.01183	5.61581	7.58045		8.57113	6.85745	5.275
										6.32494	11.2688	7.79359		10.1191	6.13621	5.76743
										6.67843	5.54415	6.55767		7.12854	6.6655	9.45947
										12.0582	5.0996	5.3715		7.69072	7.29176	5.93728
										5.14152	8.71015	5.44887		17.5997	12.5236	8.5297
										11.0936	15.7331	6.89878		13.9587	10.3319	7.93115
										5.12352	28.309	9.68438		12.5891	5.56303	9.6075
										10.7062	5.80649	8.17241		5.15124	5.70349	8.76424
										10.3062	6.55495	9.43328		11.4052	10.088	7.55344
										5.49729	7.27099	5.3886		6.38464	8.08195	5.61558
										6.41943	15.3958	10.68		11.1533	5.43695	5.65891
										6.02365	7.99721	8.31		34.169	6.82591	11.6238
										13.8217	6.80908	14.008		9.73075	9.26286	7.55777
										15.6251	8.45365	5.53627		13.1929	7.76001	12.2523
										7.21001	7.97613	8.51994		5.21624	5.35465	6.87751
										7.69142	5.24085	7.12981		9.65228	5.26572	14.5031
										5.38046	9.18327	5.65281		9.70587	5.26986	6.6479
										6.4244	5.93233	5.42826		8.44907	6.18191	12.5877
										6.84041	14.0898	9.47365		5.26044	8.66342	5.01833
										5.77942	7.10329	7.06944		5.53693	5.18452	9.93112
										5.04645	13.7834	12.0928		5.08305	7.51653	13.884
										7.20783	5.00075	8.09985		5.03403	10.6998	5.20346
										5.41571	6.55968	5.5572		5.44023	8.61777	9.85338
										5.22078	5.48335	11.7733		6.25626	7.19735	16.0922
										6.26404	7.06723	6.25406		8.80107	6.8232	16.4552
										6.21336	6.31742	5.86731		8.39523	6.61609	8.56035
										6.76396	7.14347	7.37667		7.42258	8.25109	11.9352
										8.27907	5.26718	6.72844		6.90244	7.37635	20.7392
										5.15623	6.28209	5.911		10.3439	14.0518	5.55902
										7.05415	7.16229	6.18905		11.9628	6.59596	11.5771
										5.60433	5.05029	7.7225		12.3838	11.7855	5.08528
										6.27197	5.03762	5.18125		7.11241	5.36229	5.32671
										5.25511	7.9701	5.28145		10.3273	6.33319	5.04823
										7.21384	5.0096	5.66761		5.17566	9.43604	5.05165
										5.5827	9.18639	7.76803		12.4592	7.05343	8.40614
										6.0428	11.4561	5.47422		6.02286	12.3092	5.09527
										6.27588	9.43822	7.27373		11.4064	10.0571	6.89354
										5.17493	5.69872	8.77487		6.82456	6.54238	5.08102
										10.6619	5.34271	8.9735		5.39862	6.11739	9.7843
										5.51215	5.9007	5.24981		28.2583	13.2393	9.19576
										6.05119	9.05607	7.02063		8.08574	8.76149	11.365
										5.24149	7.50578	8.05728		15.9983	10.172	9.85116
										7.08266	8.92115	5.20606		18.6249	6.30768	6.03293
										5.2821	10.3907	6.46016		7.3686	6.91861	5.50507
										5.37222	5.95151	5.16806		5.1703	10.0358	9.96776
										6.90859	8.56118	8.20745		13.7269	20.5808	16.1928
										5.87058	5.72718	7.29607		5.63382	6.62296	6.07615
										5.46606	6.39658	5.88827		5.02447	9.08963	6.88996
										5.00879	17.9002	6.57685		5.40557	7.23826	5.14443
										6.56404	7.44886	5.91819		5.06984	7.54369	9.59625
										7.99929	8.23144	9.67944		5.27747	14.3458	5.3443
										5.65533	6.77477	6.45575		7.06125	14.7023	6.72206
										5.63384	7.04964	5.63247		7.43137	8.46894	5.13939
										5.77161	5.67674	7.13116		23.6475	11.4113	5.47429
										6.06849	7.6426	6.72553		7.14377	7.4628	15.0759
										5.13554	5.28806	12.2562		5.84331	10.8583	15.9525
										9.4091	8.10034	19.0595		5.56259	12.8559	11.4086
										5.55492	6.45865	15.6054		14.7025	9.32099	10.4307
										9.85772	7.62438	6.51967		17.6076	6.90847	6.78016
										11.4593	5.90138	8.81065		23.5022	9.67711	15.179
										7.61013	17.3836	7.71687		8.22241	11.6117	9.64622
										8.37226	5.87125	7.80977		7.73779	5.7615	8.21945
										8.66514	9.20061	5.32357		11.5921	10.3196	5.2964
										5.78845	5.32203	12.9621		6.82808	5.92497	9.82973
										7.01837	5.03166	6.41626		32.0292	7.41448	5.72117
										6.49699	11.6662	16.4525		6.28158	5.54096	5.17156
										5.51948	17.1684	8.14226		9.75811	9.50095	21.1419
										6.77667	9.0491	24.8647		5.50907	8.84324	8.18049
										5.27872	8.0295	18.457		15.2147	5.31076	6.22365
										5.3096	9.30502	7.7052		7.26782	15.4018	6.01786
										5.20475	11.903	9.89321		6.84477	10.6966	19.9853
										6.48573	6.90015	15.8088		7.06649	5.43371	7.1633
										5.39485	7.23795	21.5058		6.07948	6.44726	9.75939
										7.55211	9.09899	6.17454		5.15601	11.0406	24.3684
										6.13239	13.1639	17.639		6.55095	5.95933	20.6815
										5.22387	6.91209	8.40193		7.8102	9.00259	5.60051
										5.29382	6.65225	19.8785		10.5594	13.5877	9.04103
										5.39876	7.23007	16.4678		6.52346	7.30433	10.0651
										5.3462	7.92694	5.39949		12.8567	12.7834	8.7685
										5.14438	5.67408	6.88035		14.2571	5.6357	11.8951
										5.2665	6.46799	5.18927		5.61748	11.1545	10.2072
										9.00343	8.98296	13.3048		23.5669	9.79837	6.75238
										5.042	20.5953	6.25426		9.86803	7.25279	6.08597
										5.21581	7.76421	25.7253		5.57526	8.27521	10.5506
										8.46955	19.0365	7.75156		22.8773	24.8059	18.2259
										8.21516	8.84024	17.806		7.95398	8.50916	11.1816
										5.43855	9.37244	6.47572		5.03909	7.70515	6.23036
										5.11105	14.3552	20.6331		7.67538	5.03955	5.01266
										5.32816	8.67857	9.54827		5.75549	18.8701	10.4989
										5.444	6.44325	29.5681		5.69862	8.40742	8.74757
										5.24539	6.17763	11.4023		5.77308	8.03656	5.22817
										5.30803	9.91821	5.86992		5.98743	9.92115	6.35591
										6.11596	5.09058	26.5891		5.0252	5.26647	5.06224
										5.00108	6.32782	15.4422		6.88362	11.3285	6.49955
										6.88312	5.7534	12.0546		5.90823	9.13822	5.2386
										5.19706	5.60043	15.582		7.31554	14.14	16.8821
										5.10506	6.04356	12.9914		6.36088	5.78467	8.22865
										5.18522	5.07614	5.91807		5.06113	5.75217	12.6689
										6.94307	5.25361	11.0438		6.2307	7.49247	5.01556
										6.88653	13.9892	6.85551		6.00823	11.4987	10.8521
										5.12106	10.1185	8.53676		5.36493	5.5025	18.7554
										8.142	9.24875	12.4665		10.2292	6.64664	12.7316
										6.81658	7.79756	8.40618		5.46454	17.5235	8.37922
										5.50808	8.53114	15.8615		5.19844	8.3253	5.0286
										5.60107	9.22376	12.1891		9.40038	8.86861	13.9568
										9.01843	8.02376	6.07368		6.68265	18.7983	13.9135
										5.70716	16.0043	14.0493		5.25805	5.05545	5.35357
										8.33306	5.72997	5.02994		5.58478	24.0461	5.16726
										7.17593	12.772	18.9199		7.70791	5.42685	11.9691
										5.48405	21.8797	10.2399		7.7745	12.2537	12.3989
										6.49463	11.8353	5.38114		5.35663	14.3906	8.13433
										7.56718	36.1545	8.98916		5.41916	5.28205	5.54663
										6.72082	7.27778	17.1025		12.0569	5.39378	5.1893
										5.33181	5.3812	5.97738		7.83624	6.34525	7.06751
										5.26213	21.5056	6.26757		5.71201	16.961	5.7528
										33.9616	23.4456	5.31346		5.12769	21.8498	5.13494
										9.79518	12.9329	9.35744		5.08147	13.3027	31.921
										7.50582	7.58797	23.5319		5.92803	8.92646	5.7662
										6.38222	7.58562	6.50394		5.12567	10.9444	5.40637
										5.65412	18.4333	5.00228		6.48137	8.6387	7.81936
										7.61291	10.4707	19.5326		5.39222	16.4341	5.24096
										24.8341	16.5799	7.7977		6.55599	5.85558	8.76512
										9.55663	5.40474	7.75677		5.0577	7.24585	7.89898
										8.06899	10.0087	6.15934		5.65058	12.795	5.0518
										13.0616	5.42856	14.4338		6.37473	7.66854	6.81599
										8.76928	18.9051	14.6421		6.65799	14.9804	5.06082
										7.23945	10.167	10.9404		5.30421	10.7532	5.09374
										5.44596	8.35584	6.82361		6.00837	7.7259	6.16066
										15.1697	9.67653	5.16051		5.21783	5.2991	5.09218
										13.5525	13.2095	5.61209		7.5224	6.28921	15.6461
										8.90956	8.47927	7.34959		6.41684	16.212	6.30008
										5.04316	8.74547	5.35397		8.31547	11.4471	5.55866
										7.65452	5.27235	7.89079		8.28339	8.39225	6.74741
										5.77044	21.1018	12.1244		5.13395	10.9511	11.7116
										18.249	8.13122	7.42863		5.5813	5.47154	13.9076
										19.1	10.121	6.25294		9.33867	13.1341	6.97798
										6.36472	6.81328	12.914		5.88414	7.04956	6.98603
										7.3257	11.6724	11.3201		5.62512	5.52854	13.7857
										18.0965	7.27594	28.2102		6.97692	10.931	5.26718
										5.92025	5.93088	6.24625		5.18407	18.2898	12.8323
										11.5564	6.74555	7.03658		5.3752	7.552	5.71837
										17.3791	26.5244	7.79188		5.08118	5.41177	6.21278
										10.805	13.7035	5.76937		13.1235	6.27236	11.6941
										5.23358	5.02347	6.98125		6.68812	19.9452	7.56206
										11.4595	5.12515	5.9041		5.04102	8.92552	5.47619
										8.68022	5.7068	6.72325		10.0574	5.32919	11.7599
										5.63264	26.6293	7.55571		5.20405	6.84467	7.08854
										18.0107	6.63652	6.33541		5.25424	8.83305	5.38166
										12.5064	9.0073	5.58897		5.4033	10.3088	11.105
										9.96982	5.00828	12.5794		7.93351	6.28167	18.7026
										13.5107	5.11648	5.55608		5.17406	6.32551	5.33223
										6.27335	11.0307	11.0834		8.5746	10.2076	7.26539
										5.19617	12.4266	6.86647		7.19872	5.41508	6.11714
										6.88038	5.49243	5.51843		5.14827	21.9304	9.33245
										8.17196	5.30912	6.69011		9.12255	6.8693	9.32847
										7.8685	5.03787	6.55677		7.55299	7.11895	6.9664
										22.7313	12.8065	5.15945		9.76533	11.6497	14.324
										8.41504	13.3687	6.1323		11.0438	17.1796	8.37319
										21.2593	12.4194	6.8144		5.89087	16.8003	5.8639
										5.46534	5.91974	6.37653		7.41867	5.67895	12.0393
										9.28325	6.19546	5.15092		5.35956	7.51497	8.16426
										11.3351	5.25643	5.58343		5.31959	9.40915	8.08674
										9.01388	10.1116	6.21211		5.55315	6.57363	6.46356
										8.15006	5.55785	7.14815		6.27505	7.36075	9.57797
										17.5106	7.64558	5.66673		10.4864	5.03723	13.4355
										11.137	8.30629	5.33001		5.63087	7.95453	28.1286
										8.64478	5.77068	5.98508		8.05437	5.49348	30.0048
										16.1706	6.76039	5.27419		5.03709	11.7257	14.148
										6.50038	19.0813	5.5128		6.05667	11.5667	7.99465
										24.156	13.1993	5.26543		6.51519	5.10655	26.5225
										5.97828	19.665	5.3432		5.27977	14.2504	5.0989
										17.8678	5.0087	5.03952		5.24039	9.04061	27.0966
										10.2827	6.9243	5.23764		7.61687	6.66745	9.95375
										14.2303	11.6547	6.28673		6.1227	5.06178	9.20897
										8.71431	5.40798	5.54537		11.4284	5.93808	6.68542
										11.6297	19.896	9.497		6.11964	7.41857	25.3123
										12.2859	8.79534	8.10172		5.57578	5.99084	21.2992
										6.64376	6.32473	7.48625		6.44417	5.51179	7.17736
										11.6944	11.5858	6.50425		5.65193	6.93282	9.58873
										5.71205	8.05517	5.20069		6.82818	12.7998	8.22553
										7.2426	8.99146	8.49887		5.02394	16.5075	10.0354
										16.3519	7.68436	5.81854		5.08863	11.157	8.3614
										19.0195	11.3563	9.36384		6.16908	6.19495	7.39905
										19.226	9.36934	9.10362		5.33487	6.24572	19.3923
										17.8516	18.4113	6.87696		6.24467	13.6857	12.4104
										8.9052	8.22541	5.15928		6.56214	8.31401	13.819
										7.911	5.41303	5.64203		6.1203	7.54484	16.5675
										5.36199	6.46589	7.17911		5.6151	6.17598	7.50413
										15.8369	14.0745	7.99187		5.83398	10.5551	10.1272
										34.5867	18.0972	5.90372		6.62961	5.0261	8.18294
										7.56289	9.10674	6.34901		5.08566	16.8565	13.239
										14.195	7.48113	8.95462		5.60391	7.14787	20.4303
										8.82902	17.3194	5.74316		7.3061	6.67664	9.61023
										7.15062	12.0134	5.9998		5.00909	14.8022	10.8136
										6.23319	5.05997	5.98601		5.15294	10.782	5.59248
										8.81018	6.02712	5.65696		6.39624	7.94354	10.7888
										6.85233	7.35283	5.14124		8.29196	5.04534	7.06794
										7.31506	5.11374	6.91517		6.41963	9.70478	12.3144
										15.9878	6.71769	5.1924		6.10553	6.11127	7.01784
										12.3442	10.2724	5.79796		6.04824	5.03427	12.6278
										17.1523	15.0358	5.07017		5.79853	7.16915	9.9375
										13.2345	5.07053	8.72256		6.82555	5.78968	10.5962
										7.38483	10.8619	5.22207		10.9559	11.5452	8.53949
										15.7097	7.41034	7.10815		6.94133	8.34151	29.0055
										15.4267	19.8816	5.56335		5.56938	5.46229	16.0171
										17.8686	6.82614	6.94226		9.63981	5.19408	8.44662
										18.9757	18.1307	5.1142		5.6414	6.51262	5.84515
										7.14684	9.93499	5.19772		5.71508	8.12431	11.9477
										17.1725	7.38068	7.08962		15.3451	9.91517	5.22271
										5.0372	8.69435	6.28921		10.7169	9.52209	15.8262
										5.77443	5.52478	7.75597		8.35592	5.69982	21.4019
										12.7625	10.3214	9.98468		9.95212	13.207	5.78344
										7.74212	9.11243	8.57671		13.7237	5.02993	9.27396
										9.73257	12.3115	5.50559		5.58692	5.52378	5.006
										6.36653	7.38047	5.63739		12.9688	5.94682	11.4472
										12.5755	23.3943	5.06727		5.0223	6.12341	6.46462
										14.6914	7.17314	5.21268		20.1206	6.76343	8.15322
										18.6662	11.9952	6.95366		9.17077	6.16755	13.2628
										9.01077	11.0562	6.78307		5.57956	10.2479	8.43115
										10.3821	7.27258	5.31276		5.11927	5.56131	6.73344
										17.1935	15.7918	5.13126		13.6147	13.5889	5.54849
										15.0836	11.2784	5.13399		5.45276	12.6456	33.6294
										12.1627	6.22535	5.6876		7.57198	5.12038	9.7737
										11.2328	12.8665	6.07853		6.65394	6.44594	14.5355
										5.31106	7.48574	5.98583		6.1456	11.8457	5.1979
										5.89888	13.5694	5.87664		5.33527	9.58392	8.96297
										13.6216	14.9211	7.23466		7.23964	5.22604	8.27598
										6.57404	10.9455	5.96416		5.14682	14.8769	6.55861
										10.3356	14.933	5.51632		6.03933	8.41449	14.4527
										9.30433	10.5042	8.26498		10.4609	5.4431	6.6343
										7.79021	8.28455	6.3121		12.9363	6.81814	10.0582
										8.58453	6.11375	5.5291		7.06953	5.96228	14.4376
										12.0836	12.745	5.92403		8.98719	5.04822	9.65762
										8.31937	8.09453	6.56711		6.7511	9.42748	8.34434
										7.07784	20.3365	12.9394		5.0211	11.946	9.0079
										14.1825	15.7107	5.31704		6.11425	7.36894	5.20545
										6.11598	11.9009	5.00102		5.29265	10.4093	6.31411
										13.4428	13.3823	5.30898		5.35548	12.4462	10.468
										6.94545	11.3551	6.39057		8.24765	7.36837	16.0346
										11.2652	17.9846	7.11858		11.1339	5.70848	6.16685
										10.1094	10.9916	5.59842		5.42831	5.13085	8.78494
										6.81651	6.24498	9.16476		5.24687	8.34001	5.02457
										7.37784	8.4468	5.28589		11.6487	10.4237	8.4999
										9.04279	16.9069	7.67083		8.62443	10.0681	6.92623
										8.20513	11.7253	5.196		5.34815	19.0804	14.7649
										10.4527	8.85824	8.14007		16.6549	12.0254	5.97286
										9.03638	7.51928	7.74461		5.05367	6.14187	9.53041
										25.9237	22.7594	11.3452		10.5814	11.2069	8.0011
										12.3187	6.38678	7.4134		7.42658	5.04658	10.6656
										22.8854	5.88524	7.46626		8.89444	6.13312	28.505
										11.9793	7.24461	5.48286		7.07204	5.14944	5.70451
										14.1396	19.5295	9.14529		10.1374	17.3116	13.3507
										7.2432	5.09097	6.18153		16.1492	6.31153	6.69821
										10.2437	9.39477	6.71491		13.989	8.71852	10.1141
										10.7762	9.55296	9.79095		5.66605	9.64245	7.34486
										5.45629	10.5292	10.0428		6.8119	8.68885	7.08395
										7.74279	18.5528	11.5556		5.85155	11.6814	5.13607
										6.80965	9.64964	9.95415		9.23648	5.42515	14.9928
										11.6188	9.57003	7.97032		6.54444	11.6669	7.58663
										10.7397	32.8739	6.18648		5.3052	12.9771	5.01532
										6.1559	7.56371	14.1204		12.1386	9.34396	5.65259
										14.5445	11.2783	8.07222		7.14937	5.47568	14.5351
										8.99386	15.6803	6.43605		10.1148	16.8041	14.6825
										24.2349	6.88532	6.00093		7.61067	10.5367	6.97683
										6.42008	9.52277	5.60612		14.2936	10.1564	12.4439
										30.1032	10.7471	5.16899		5.05128	9.75283	6.95478
										16.0739	25.9356	5.14853		5.22162	5.51663	6.87779
										12.7686	12.3135	12.1505		7.07841	5.48165	8.37762
										9.9275	12.5883	5.65039		6.69254	9.97294	8.79971
										8.24074	27.6728	5.38547		12.136	5.10043	10.1359
										14.6742	16.0559	11.193		6.79756	9.06371	9.59074
										21.8636	16.6179	8.005		5.58147	7.46509	11.5671
										18.8016	11.1798	5.12371		7.25775	6.31674	7.82719
										10.7519	11.8253	5.55814		10.9517	6.67395	6.34978
										7.37243	24.5885	5.17074		5.67147	6.12969	9.07638
										11.688	8.30534	5.92975		6.5432	10.5567	15.2787
										8.41146	9.74012	6.64217		5.05415	17.214	7.00231
										8.76054	18.0272	5.02603		9.90528	7.47492	7.02267
										5.46916	7.07511	5.30522		5.2714	5.51752	9.99853
										27.9908	13.0586	7.19423		5.16899	5.75194	10.6882
										11.29	6.45206	7.38092		10.4928	9.14485	5.62215
										10.4257	7.71235	5.46875		6.21163	11.5529	12.2465
										10.5815	14.1565	8.02513		7.15043	8.12247	10.6273
										23.28	9.07754	5.38667		7.77098	7.13182	5.07475
										16.4363	12.2372	7.99382		9.62227	5.79648	9.395
										26.18	27.4442	6.79578		8.38573	13.851	7.44124
										5.8237	8.72351	7.67724		7.68181	9.46961	5.63717
										8.08669	13.746	8.2896		6.64636	6.69878	13.8744
										13.8257	5.65152	10.9881		9.38671	6.5205	5.44696
										14.0079	23.6084	7.26822		19.1119	7.8907	8.95272
										34.1596	11.0951	5.19868		6.37562	6.22354	5.67729
										7.20159	20.5385	6.44156		6.97095	5.08367	14.2702
										5.7045	14.4998	8.15682		5.46629	10.7328	5.80607
										12.3792	19.9225	5.41916		9.16914	8.45111	19.5242
										7.4004	7.4391	16.8863		8.56853	14.1833	5.04344
										11.2615	8.13754	8.48267		10.3165	6.1278	8.45542
										5.21394	21.0926	9.27645		7.36004	5.99899	6.20731
										9.66125	12.0157	9.42118		9.84674	9.32503	15.9613
										14.4799	11.5141	5.0219		24.6138	5.82573	6.21414
										6.2144	19.2583	9.59255		5.6856	7.60915	7.98575
										31.3598	10.2286	6.68621		7.01272	6.54327	11.1635
										6.8965	12.6626	8.19383		7.62567	13.0214	27.0505
										5.34139	8.00312	9.07206		5.43868	5.07934	7.90466
										13.9821	6.23185	5.66888		7.31188	5.02366	5.93501
										5.32975	6.78322	7.99563		5.72242	5.24043	5.37395
										14.036	14.1169	11.2596		7.62371	5.82684	5.99217
										10.125	10.4636	6.54671		7.98889	8.60984	5.30447
										9.16455	23.0402	6.17559		5.97064	7.78253	7.4937
										13.2283	19.136	5.39977		7.88901	10.1332	10.1556
										6.08414	11.513	6.04512		10.7043	7.05687	24.5239
										7.87897	14.7655	5.52254		6.65905	16.8107	7.43608
										5.28119	13.8363	7.3436		6.54378	6.31588	23.3984
										5.08353	17.4599	5.10422		5.82491	6.03102	6.27047
										9.65514	16.6328	7.00188		5.17067	10.4384	5.78972
										6.55588	14.5111	5.35869		5.36626	8.22412	7.39186
										33.1791	14.3152	6.63077		5.12475	10.5355	6.39067
										9.13444	9.76474	5.05863		6.00236	9.21866	12.0209
										18.0547	26.3092	6.29		14.3362	14.8081	6.70588
										5.77971	12.319	6.77521		5.62489	5.30769	7.4979
										28.1151	10.3486	5.21958		7.76057	7.7584	13.1594
										9.83373	10.7606	5.58917		8.81005	7.68649	8.02019
										24.1608	13.7306	5.95136		6.07151	14.0821	8.85848
										22.7057	9.06178	14.7304		9.55427	8.25305	6.30212
										9.92409	5.05011	5.09935		5.52674	9.11288	13.102
										15.5588	8.69596	13.4876		5.12011	11.7782	11.8584
										8.32087	12.9223	6.58002		6.45946	14.6794	5.84072
										5.48996	10.2181	5.50755		5.27664	21.1162	12.4012
										8.60886	20.2947	7.34982		5.73724	11.2514	6.34624
										5.35649	7.62809	5.9296		5.17817	19.0824	19.8094
										6.28477	17.5998	5.55736		5.79824	8.5005	9.00204
										5.06428	6.00408	5.92596		13.8916	5.13451	13.0097
										12.6295	11.0702	9.61131		5.74782	5.65045	12.519
										17.0318	6.20779	10.0212		6.33628	6.84425	7.27185
										20.9713	17.916	5.60004		6.08987	7.55633	15.684
										27.5926	14.4641	7.93464		6.2067	6.94626	10.7109
										7.8042	9.28144	5.40083		5.76403	15.8251	7.07893
										5.76263	18.6946	5.15922		16.8692	13.727	6.59687
										8.91112	6.75743	7.87092		14.9012	6.28105	11.5376
										5.89205	19.457	5.78241		5.88164	11.3344	5.56926
										5.19979	21.018	5.69439		7.97049	9.94803	6.05807
										31.6007	14.3655	5.07658		7.18579	7.97346	10.4815
										29.3258	6.45756	5.16707		5.11756	12.0647	11.8073
										22.5779	13.1968	7.67082		6.14208	13.2684	6.30268
										10.7876	13.793	7.68417		5.18116	10.1625	15.1533
										12.1831	7.53832	6.79103		5.06183	5.96567	8.52678
										38.3078	5.41078	7.45777		22.7372	8.8193	10.1344
										5.73439	9.98275	12.6496		7.04946	6.34412	6.6001
										20.7521	15.0218	8.09407		5.01611	11.1449	10.8615
										33.4801	13.6143	8.03281		9.14395	5.35496	5.94343
										8.65178	16.6016	8.52611		6.95338	6.43606	8.54057
										7.54692	17.1791	5.2772		5.53218	20.3199	7.65602
										25.9096	5.2324	7.32942		11.3456	7.4991	6.15654
										12.1109	13.8681	6.09768		5.37881	17.3771	7.19569
										15.2565	7.36591	8.22864		6.42173	5.83865	7.32841
										5.17324	16.5544	5.04682		6.57987	5.02151	5.11274
										5.30081	24.9819	5.63774		6.11218	11.0223	26.0248
										10.9107	16.0532	9.19231		5.30157	16.1815	16.4546
										21.3043	9.70216	5.172		5.13147	8.05666	9.74252
										18.6124	11.4551	5.9677		6.97249	12.8309	10.2194
										13.7961	13.4535	13.7981		5.95568	5.26067	5.05461
										10.3841	19.2455	10.0429		22.9926	21.5181	7.64113
										9.45527	10.3751	12.3084		10.9497	17.979	7.38801
										20.2823	7.07528	5.30741		5.30419	9.31191	6.3547
										27.2359	9.72194	5.87655		6.5936	9.83542	12.7545
										19.9512	5.58003	5.82849		5.3224	12.2189	5.40483
										20.2304	11.0514	5.94344		13.1092	13.6241	18.9421
										7.99226	5.0432	8.44836		13.0846	13.8517	12.2807
										17.9365	23.0835	10.0484		7.79553	5.49953	5.36235
										13.8372	16.1589	6.81901		19.396	11.3099	7.5817
										30.2328	18.0679	8.13351		7.69609	9.06732	9.17776
										21.6195	16.0683	9.39588		8.44963	10.8507	10.7816
										14.0046	13.0485	9.84114		8.36889	13.3058	8.07838
										21.0721	12.4153	5.19271		11.4423	25.7965	8.12952
										5.34602	18.2326	6.72577		7.33518	22.1691	6.93219
										16.6225	10.8399	6.79792		5.0722	7.58498	6.35696
										6.97069	7.24623	9.47291		5.70619	5.37902	7.95437
										27.9068	21.4829	5.23481		7.39519	7.87268	10.9762
										39.634	22.2768	11.1803		17.2673	7.97803	13.7016
										15.6969	9.93363	7.12803		9.30637	9.05044	12.4435
										13.7725	18.4607	5.58777		6.90322	8.29194	15.5116
										31.3356	8.38597	8.68071		14.0302	8.3578	5.35683
										27.6653	6.34767	6.37938		8.92063	5.36189	15.6992
										42.4238	5.0267	9.46604		6.79069	9.60065	9.9721
										25.6275	9.68379	6.31168		6.99143	5.07223	10.7772
										29.087	15.9938	7.16825		20.2666	8.41937	8.24315
										6.83803	22.1479	6.93836		10.3208	9.00228	18.0831
										5.07033	36.5821	7.88642		5.17561	6.96703	15.6251
										13.9784	6.11986	7.26808		12.1707	13.6826	32.3527
										26.6516	5.07543	9.10566		14.6734	5.58878	5.7784
										24.0678	9.56716	7.38218		5.00124	9.15084	7.68578
										9.37792	8.84848	5.54937		21.8265	5.69879	9.0366
										5.16869	5.52383	13.2073		6.4791	18.7841	9.93525
										5.89721	9.95907	5.17171		13.9314	8.95748	17.9146
										6.38862	19.7308	5.48614		5.61603	9.61578	11.8921
										8.13308	11.2978	8.93586		6.95158	11.2181	5.12365
										36.8055	25.4382	10.754		17.4853	12.374	14.9915
										41.0577	11.2781	5.12357		9.02892	21.9245	15.4211
										15.3	16.5292	5.44958		5.1812	12.2303	5.87232
										22.5043	5.14557	6.27782		21.3863	9.45702	20.439
										17.3172	6.43911	11.0253		5.00344	5.74967	9.16693
										15.7965	8.2414	5.3895		5.95183	5.41491	8.96045
										36.3571	8.3653	6.11631		7.91519	10.6445	5.0765
										5.09802	10.7276	6.21886		13.5277	5.75236	5.65939
										20.3262	5.49007	5.08105		19.3115	18.5705	10.1257
										7.70592	5.91537	6.11696		22.586	10.0087	6.7386
										30.054	9.52647	5.17837		26.488	6.44456	8.83439
										14.8577	6.86752	8.19829		6.5116	5.95599	13.0403
										23.6428	7.5675	5.2358		10.0061	5.01835	14.0813
										24.3913	9.70105	5.85369		5.62381	5.17377	6.04262
										19.2567	20.566	5.43413		6.96681	5.02719	14.8161
										20.0347	5.69906	5.39812		8.07932	10.6884	10.7338
										32.8946	7.01849	7.8084		7.21657	10.5858	5.82901
										31.0376	5.9574	5.09115		9.77267	6.0037	14.5645
										14.8631	6.72354	5.89606		9.17047	7.60599	5.0768
										46.6656	12.2823	6.58277		5.18316	13.5856	6.68913
										6.93144	14.9681	5.68005		8.37848	9.57422	9.63265
										15.9787	13.0947	9.9145		8.12725	9.09162	10.751
										23.4733	8.31796	7.15057		16.3718	15.1526	6.31053
										25.963	10.2986	9.62202		10.3934	14.8401	11.7747
										19.2325	10.5368	5.81819		9.54336	5.99821	10.3174
										6.13635	24.1167	5.08196		11.0402	7.86499	6.6997
										11.1571	25.3168	6.40519		6.60075	6.73686	5.98522
										17.525	6.53194	6.61757		10.3052	5.91758	5.36323
										5.08705	8.52811	5.76591		7.15316	7.28895	5.53786
										7.61907	8.57728	5.24863		10.4355	11.6932	5.21349
										23.6079	10.0283	5.59961		5.56326	9.56368	7.69479
										6.70655	6.47509	10.0779		6.08865	16.8806	14.2233
										7.38359	16.9561	5.17379		5.95081	9.4677	6.44023
										28.4476	11.4036	5.61941		6.41565	7.93654	13.1578
										14.5731	17.1902	6.33866		6.57636	5.79867	10.1642
										28.0261	13.4941	7.3463		10.6843	23.1257	7.20181
										10.8299	7.83406	7.27837		10.3881	7.11201	5.66628
										8.81339	5.28239	6.22687		8.63041	13.9758	5.97345
										7.85596	18.1175	5.18511		8.16028	10.1001	7.57804
										14.2411	14.2683	5.2273		6.49172	5.13961	5.11619
										15.1246	12.322	5.05143		14.2012	10.4492	20.2766
										10.5362	27.275	5.72459		8.69848	5.58626	5.56236
										31.5815	6.9406	5.51119		9.95337	9.95682	10.3809
										18.0517	14.2146	5.0278		5.07686	14.1484	8.77118
										8.18972	10.843	8.97339		7.56876	5.04627	7.1124
										34.5976	8.28873	5.54053		8.61633	6.42696	8.64971
										10.6133	7.22687	5.71978		8.96095	7.92821	5.34923
										10.3026	6.97745	5.25637		7.58015	5.6973	6.29264
										10.8241	8.19946	8.82996		9.67744	11.9515	10.0323
										9.65789	8.91851	5.73027		5.202	7.08861	8.93646
										18.1603	26.078	5.43931		6.46377	5.99337	5.74004
										10.1512	5.59191	7.14999		7.86577	5.8605	6.18267
										5.81484	9.37659	5.17442		5.54798	5.09462	10.4547
										48.2398	11.3704	9.37184		5.61539	6.91471	6.7497
										5.59034	8.82464	6.14613		10.2254	6.62327	8.41539
										19.1323	12.7933	5.00126		6.01488	5.42238	5.08351
										13.3166	11.0279	5.67652		11.9407	12.5858	6.67866
										8.85992	13.9897	5.73421		10.4231	5.72699	9.12376
										5.69692	16.5984	5.04648		12.5864	15.3799	14.266
										17.9912	19.1592	5.37373		5.64841	5.04248	11.1441
										26.937	6.58016	6.14873		6.40783	10.4813	9.90681
										26.1873	5.82738	7.01602		9.64171	6.87968	5.95797
										26.5556	8.25638	5.48491		9.49555	11.3217	18.2364
										8.97684	15.2328	11.2679		11.1669	5.80799	5.92371
										23.7794	22.5765	9.01984		6.38335	5.49712	7.81586
										8.20957	10.2397	7.83168		5.91164	13.0919	10.9027
										26.017	20.0441	7.52357		10.8988	8.04038	11.7818
										22.627	25.39	8.7461		5.3532	6.12669	11.7282
										34.0121	6.95605	6.42845		14.742	5.29099	8.2076
										5.79686	9.05648	11.7027		8.30521	9.42218	7.06697
										13.3895	15.5143	6.23437		5.21679	5.97663	15.7004
										29.4711	29.6694	7.21946		21.5888	7.9673	6.20855
										17.6411	7.29093	5.00595		5.05869	11.6869	6.05351
										10.1658	7.11796	9.35128		6.04486	5.35336	11.1626
										11.6137	9.69201	18.7466		9.04981	8.33574	5.14579
										5.00306	5.4235	5.55221		5.47902	9.56091	7.74827
										6.28086	15.3952	5.57488		11.1425	6.94613	7.60571
										17.5642	14.4883	5.35253		6.12385	5.77229	9.11846
										8.93674	25.73	6.2786		12.4159	5.35164	11.739
										10.5999	7.067	12.6638		8.76155	5.40326	5.81406
										21.2432	10.4178	10.6877		18.3178	9.31646	7.12034
										12.7218	14.1545	13.898		11.0377	11.2401	9.64884
										9.73896	25.0152	11.9829		5.43246	6.73192	5.79238
										10.5621	10.2954	7.02907		16.0983	8.00852	5.31533
										16.855	11.0729	5.30598		5.99427	5.79261	5.98727
										14.9717	9.09886	5.43528		6.80844	9.6026	7.40232
										7.3173	20.1366	22.7022		5.67336	6.167	9.08028
										14.6069	26.7234	9.12606		5.64128	10.1584	5.65671
										25.6958	10.5643	7.87679		6.50021	5.02177	16.6676
										5.14216	13.9575	11.2969		7.0628	9.51764	6.12105
										10.4836	11.8413	5.35315		16.8383	5.98412	9.16065
										6.43366	9.33442	7.23467		6.12343	5.08549	7.2412
										9.38602	18.2004	7.97252		8.97461	5.35957	8.03645
										27.9086	14.7186	9.52498		5.97276	9.70365	5.80733
										5.252	9.49565	5.3126		6.14398	7.6296	15.0053
										11.1449	15.0417	16.114		5.24178	10.0261	5.83312
										6.47358	16.1894	13.8274		11.9843	5.89199	8.04317
										35.4581	17.811	7.05046		15.2665	6.86842	7.27325
										26.8479	22.6694	10.0635		8.05412	7.79274	5.16821
										25.3219	11.9544	9.62307		8.79531	5.6336	5.04307
										34.7899	19.9602	7.55247		16.997	7.65013	5.57613
										14.2386	6.86858	11.7191		12.5473	6.45177	6.2589
										6.18008	22.4564	13.6135		12.2083	6.819	6.15404
										17.7323	5.46518	7.54449		5.14997	5.52986	5.24468
										6.88036	21.3443	9.71307		6.78696	14.5484	6.24813
										8.92764	12.4938	5.20749		18.5765	6.44199	11.9274
										6.46243	10.4761	6.41948		5.24062	8.00622	10.2874
										26.0475	10.901	8.0506		11.7834	6.98716	8.3319
										16.1559	8.46507	5.09977		12.5481	7.93287	7.28319
										10.005	18.3864	9.21613		6.58196	8.65213	8.29555
										13.8902	6.19165	8.85331		8.90003	5.69857	5.4481
										27.5367	8.12187	6.40215		7.03485	5.63227	8.90946
										7.02582	9.07968	11.043		6.12183	10.9068	5.15368
										8.11847	8.25838	7.98995		5.78446	17.2208	10.4877
										10.1303	5.55974	5.41792		18.9656	11.4047	10.7951
										5.00086	5.31616	7.91622		5.94672	7.02524	5.36706
										9.46922	5.27491	9.95347		6.85672	8.8088	5.10342
										49.1841	7.6305	12.6838		5.46755	9.43855	7.72317
										7.2345	10.0074	6.57432		5.36019	11.9651	6.1639
										23.6937	5.23855	7.80442		11.6302	10.2807	5.14442
										7.88037	7.14446	13.4188		9.64618	7.01646	5.49824
										6.80092	5.48377	11.0908		5.23163	7.63294	12.5151
										6.27442	8.13873	5.0162		8.66592	6.87996	5.33742
										23.7201	6.4958	6.07204		10.0011	8.05214	5.00111
										12.5909	18.0995	14.2622		5.63105	5.42412	8.84794
										17.3435	6.65358	6.7308		8.22546	10.9543	5.12391
										6.53088	6.5656	8.2597		16.2867	9.82578	5.5866
										35.8303	9.51643	9.78432		11.2577	8.32019	6.46198
										31.282	6.97839	5.52006		12.0832	13.8999	9.04498
										24.3701	6.08785	8.20019		14.814	8.04085	5.01542
										6.84889	14.5169	8.92462		22.9217	10.5086	5.66951
										36.0775	5.1634	8.69917		14.1419	12.4154	6.2481
										11.2751	6.77234	5.95278		13.3289	6.62518	5.09355
										10.2636	5.096	7.342		9.81008	6.66911	6.32846
										13.872	7.1256	8.80924		7.02853	8.96827	5.93814
										20.9157	5.09031	14.1583		12.5676	7.83642	6.58275
										27.3327	6.44106	8.81318		5.87536	6.04389	7.6035
										8.63371	6.22013	5.24878		5.34018	5.47068	7.4086
										14.3134	5.98822	10.62		14.7868	9.50255	5.58236
										26.8917	6.98606	8.40773		10.6392	7.56998	6.17176
										21.6234	5.10436	5.52768		5.08683	9.80439	8.57316
										10.0289	11.5807	8.54263		7.58406	14.9886	6.49018
										6.10346	5.00402	7.7008		5.49294	7.29117	6.16866
										5.24544	16.4763	8.1815		9.76434	7.46436	5.939
										12.8185	8.08432	6.80683		7.47263	10.0237	5.36325
										28.0196	10.8287	9.68173		5.70922	6.04696	8.45066
										12.9509	8.12516	12.9068		5.28498	5.20695	8.14277
										10.0742	9.09042	6.22552		12.7697	7.89948	9.75546
										26.6585	8.56485	20.8904		13.5961	5.9717	5.07711
										8.34133	6.51481	5.34532		14.2934	5.30809	12.5259
										16.238	7.52531	5.45087		6.8225	8.78087	5.53197
										12.4279	5.51059	18.9176		5.03968	7.91973	5.32518
										20.289	8.01939	5.86475		10.9094	8.02813	7.50048
										6.36648	5.32543	5.19104		6.25315	11.5705	5.51548
										16.0686	6.20788	7.06913		12.4321	10.2552	9.20779
										16.1022	5.7499	5.62551		5.37832	8.93597	5.07468
										16.4286	6.10811	14.2567		7.74731	7.57998	5.75035
										15.9391	5.77735	5.35502		7.83715	8.9458	5.52985
										13.2451	6.87647	5.08892		5.1374	5.95232	5.91363
										10.453	9.06801	11.1198		9.15306	6.70891	6.32717
										8.26465	5.52788	5.35491		6.071	5.61421	6.14189
										11.8634	5.00484	7.15107		7.95421	5.34703	5.01771
										11.1257	7.29103	7.76002		8.1025	14.4975	8.33524
										5.39696	5.35824	5.96568		5.70027	7.3757	5.81536
										23.8126	8.23007	5.0106		9.71345	17.6617	5.97199
										5.1071	5.75977	5.88873		13.4784	6.0438	6.3265
										8.37298	6.31568	7.99133		6.13517	9.54848	5.02301
										19.9604	6.41661	8.88212		6.94764	5.91888	7.76695
										14.358	6.6581	8.51355		6.94366	5.90149	5.25594
										5.74871	12.2126	14.9156		10.2085	10.618	5.02897
										8.22242	7.61334	7.72659		9.69026	5.35071	10.1602
										44.3438	5.49726	8.88527		11.8238	5.46156	12.9738
										13.8508	7.20999	11.8029		9.14025	7.47506	7.58878
										8.40891	10.1175	5.17924		7.54452	9.2667	5.81285
										35.7572	5.8044	8.56318		9.72686	6.66724	5.7131
										13.737	7.0288	6.57284		5.68112	6.87372	5.55571
										6.3319	17.3286	6.71474		5.45032	11.0954	5.11705
										26.7038	5.15619	11.4636		7.34025	7.70088	6.26441
										8.70723	5.14759	5.64242		15.6498	7.5668	6.87234
										20.0718	10.4126	17.1523		14.8806	5.66065	7.49159
										8.64108	5.51304	13.9543		8.23245	7.02803	9.85465
										23.9445	5.98892	19.605		5.4617	5.41591	5.2253
										7.00558	5.2791	8.80013		7.50465	5.04794	5.58668
										17.2774	6.58686	11.5355		9.55694	6.57259	11.2308
										33.1293	10.6489	6.97184		7.60921	5.83823	5.02248
										8.5582	7.19407	16.6701		8.26054	5.74413	5.75849
										6.27597	6.61603	7.42692		5.31837	8.35338	5.6678
										5.24815	7.36051	7.6491		12.8371	6.62551	7.90203
										32.629	5.14726	23.5381		8.55188	5.78039	5.10294
										5.51103	5.74257	19.3044		12.51	7.10176	6.51494
										12.9504	6.83872	11.3025		5.84838	7.54255	8.36801
										6.22103	8.35441	6.89001		9.6028	5.30737	5.31826
										16.242	7.7213	6.84864		6.48733	5.42861	5.54009
										10.524	9.89418	10.3034		7.9775	7.92212	9.90466
										5.74731	20.8584	8.96804		5.56812	9.92434	5.67482
										10.2724	6.40419	5.75362		5.3447	6.84627	5.03421
										11.1158	5.50721	5.36402		5.15147	5.83085	6.01015
										9.13848	12.2022	15.0069		26.6586	7.43695	5.08619
										6.59879	6.96601	7.98908		9.63171	7.86028	5.48442
										15.5921	7.36718	12.0953		5.9281	7.95505	5.8618
										6.86722	5.68236	6.5575		5.96943	7.39772	7.23715
										11.9011	6.09705	5.78111		9.00119	6.17599	5.65526
										11.6837	5.64411	12.401		8.4498	7.92	5.56484
										13.1794	6.28393	5.1543		6.75579	7.07018	9.71898
										16.7469	7.97438	19.5221		15.0275	6.85245	6.44159
										9.80505	6.87639	26.0846		6.32658	6.98809	6.08226
										11.4424	5.21299	5.4624		5.18902	9.61079	5.02069
										8.54749	7.84878	8.3077		5.5723	5.82712	5.03209
										5.13258	8.50696	17.119		11.1427	7.45047	5.0057
										19.718	6.06634	7.23152		7.16898	6.51582	5.33386
										10.3563	7.89073	19.2527		10.1976	9.81381	6.99952
										5.76495	5.72655	7.43532		5.60033	8.93616	5.56929
										10.4308	8.07211	6.64797		6.99782	9.37363	6.22039
										6.29052	7.52357	21.4271		5.50612	7.15021	8.69376
										9.51663	17.4928	9.37159		18.1881	8.22234	5.19153
										8.80152	15.2716	6.3466		6.70526	7.38735	6.09089
										6.94964	14.8163	11.1244		7.71162	5.1293	5.77619
										15.7071	6.91406	13.9427		12.6472	8.6614	5.07104
										12.4898	6.80351	10.6628		10.7223	5.01769	6.39787
										11.5002	8.59964	5.48244		5.60855	7.0513	8.32223
										5.13696	5.57378	6.62498		5.07991	6.31489	5.15068
										11.3171	5.36688	9.39441		5.69233	7.95466	12.613
										5.66018	14.2422	7.54529		8.37251	13.1708	5.22035
										6.61047	13.5462	10.8411		7.38857	11.0337	5.98947
										5.01848	7.83036	27.0124		5.25663	10.3735	7.06041
										5.33563	6.72409	6.75366		7.82987	8.52818	8.61837
										5.91389	6.24518	10.5012		6.65875	5.6481	6.17567
										10.807	9.9338	10.3615		8.29939	5.29729	5.01178
										5.90184	12.3423	5.45583		7.67162	8.6882	5.38181
										9.04729	5.24063	17.0636		7.07923	6.83694	12.4524
										11.1897	9.82884	10.6723		5.58725	6.31055	5.46528
										5.34458	8.85158	5.13801		6.16837	5.14657	5.41159
										5.07423	14.5759	9.99348		7.67318	6.5022	6.94177
										9.79932	5.80301	9.79754		5.06002	5.29993	9.02492
										5.00354	16.8907	8.65121		5.3817	6.42675	5.30307
										5.64238	8.66705	7.13922		6.3517	8.40762	6.85376
										14.3917	5.14453	10.2723		5.00363	13.8665	6.74563
										6.70872	7.86821	10.7881		5.21319	6.76379	5.30067
										6.08914	7.86025	8.84775		6.3239	6.78282	5.11708
										6.03322	15.9949	11.5289		5.83621	6.47478	5.43574
										9.80626	10.5466	10.3766		5.38888	8.02275	6.68554
										6.02703	10.303	10.8494		7.61167	15.2663	5.51023
										5.5305	5.24631	22.4112		13.4646	9.03559	5.40638
										9.71431	8.72194	20.2144		10.3713	23.1107	6.58602
										7.00637	5.32953	7.87419		5.78986	5.70714	5.06559
										9.0373	16.3999	6.93367		6.01941	6.3553	5.77145
										7.42611	5.54842	21.0144		12.4056	7.32264	6.96155
										10.6628	5.63727	10.2048		5.94551	11.517	5.52876
										6.52688	5.71571	5.47691		7.46551	6.3982	6.03093
										6.03748	7.67291	12.1452		7.44612	6.95336	7.75694
										14.1606	5.04063	6.77695		13.7607	7.04082	5.07399
										12.5399	10.7728	8.60989		6.41634	10.8049	5.19026
										7.13687	10.7218	5.90082		5.71841	7.74658	6.87925
										7.02776	6.36392	5.13015		14.7988	6.48824	10.2113
										5.0288	7.4619	14.697		7.99971	13.9213	14.031
										9.81761	5.47035	9.50987		6.92142	9.10782	5.61041
										10.9165	6.22935	18.7963		8.02791	6.77164	11.9144
										9.81067	6.52163	13.8718		5.14091	9.68162	7.36244
										5.56849	5.76481	6.27711		5.32617	7.1828	5.57067
										5.35417	5.89483	6.09257		5.82731	9.05744	6.05426
										6.82704	5.73832	5.13258		26.7378	6.66124	5.6879
										7.41439	5.93856	15.327		8.562	7.81988	6.57335
										5.21717	17.4638	5.06909		6.20055	6.33584	8.14282
										19.7944	9.2093	6.11101		6.88437	14.7255	10.0372
										7.15838	6.50519	5.19499		6.97045	8.29019	6.84217
										12.1888	7.12466	8.11619		7.31577	8.50916	6.28956
										14.8621	5.2018	9.80533		6.50229	9.55931	11.0203
										6.20796	7.93398	7.98909		7.48678	7.47161	5.64273
										5.52406	6.47662	17.6199		6.03996	7.11884	8.69912
										5.38893	6.393	5.64185		8.72677	7.04994	5.09438
										5.6253	8.08379	21.449		6.17287	9.70181	9.10715
										7.74006	7.20025	7.90515		11.8775	6.2748	12.5285
										14.2977	6.21458	5.11917		13.1548	7.27435	5.08311
										6.41688	9.82426	6.19321		10.59	5.84095	5.90098
										10.4273	5.85433	16.8626		5.2758	5.36496	5.72917
										6.58277	7.55991	6.70415		12.0854	8.39777	5.951
										5.5893	7.71575	12.7664		6.22517	9.5398	13.8525
										9.47215	16.5171	5.41088		10.6324	6.25569	5.66327
										7.46472	5.04232	9.80991		11.0014	7.63634	8.15291
										8.93296	9.92752	5.5785		16.7082	7.00389	5.03536
										10.6242	7.23762	6.15941		19.0196	10.3492	11.7825
										13.27	6.92686	5.78273		5.61663	10.0688	11.9221
										5.72808	6.11762	5.20809		5.87902	7.5779	7.25481
										8.7768	9.44084	5.89463		9.61882	19.1861	8.4003
										5.10065	5.55058	7.58725		11.2586	7.60473	6.97675
										9.2367	7.13621	6.05033		5.2508	7.34422	8.55043
										9.40324	6.32273	5.46887		6.06113	5.45763	9.09388
										7.46934	5.57973	8.58821		8.26412	13.7261	6.80409
										9.60358	6.73171	5.06854		13.92	6.23698	5.14045
										10.6659	6.56581	5.08344		9.23175	5.76542	6.35941
										7.10608	7.14801	6.81315		16.5327	16.3324	5.78485
										17.6867	5.85835	5.19195		5.60812	5.88925	7.36768
										5.18821	8.26788	8.20258		9.3154	7.53781	5.27421
										5.69756	6.72139	6.92241		6.54181	8.97178	10.1014
										5.46914	7.84375	10.6424		7.97806	5.39001	13.4122
										6.70528	14.7779	8.65763		10.4076	6.17321	5.97787
										6.18956	5.46237	5.55752		11.1158	10.7808	6.09956
										5.36777	5.27291	9.47175		8.77917	6.43654	5.49354
										5.27992	14.8748	5.54192		6.40574	8.20749	11.0628
										6.58035	6.52225	9.63152		5.84188	5.11591	5.61516
										9.93297	7.89206	6.58793		5.67797	8.46464	6.95009
										5.66055	8.89418	17.6399		7.63874	6.81155	7.12286
										9.44372	5.43491	6.45042		14.3433	6.90631	7.01107
										10.0275	5.24172	10.8373		12.2005	7.53775	13.9833
										10.4763	9.61704	5.84623		6.6712	6.19972	6.03597
										12.0487	6.85562	7.08171		11.1364	8.03711	9.45385
										5.74523	14.9115	7.43068		10.2063	5.96872	6.52014
										5.58139	9.13569	8.02164		5.45269	12.0791	5.02479
										8.87778	5.67887	7.44211		9.72779	8.88168	6.25797
										14.059	5.4894	8.18135		5.21064	5.02702	20.596
										5.96304	11.1141	5.84334		9.27775	6.69863	8.64199
										8.30214	8.18114	5.84405		13.6628	6.60862	8.08544
										14.1393	5.74908	8.18572		6.80436	6.6593	11.095
										10.6985	22.151	8.44279		7.85554	7.71362	7.39906
										16.6237	14.3093	5.22006		7.82646	15.3111	5.02673
										12.1328	9.00251	14.8332		6.69943	7.02798	6.00496
										7.62286	13.4936	6.06788		7.24753	16.2075	6.1254
										6.14786	11.8429	12.8571		7.37732	6.26786	10.2795
										10.3846	7.57581	7.08335		8.22392	10.5094	7.64028
										13.5467	6.5168	7.18013		6.69659	7.17544	8.69541
										6.65304	12.3706	15.4984		6.16864	5.73987	5.27825
										5.34978	7.55092	6.26877		7.04379	7.06027	5.19082
										7.56467	19.4873	13.7984		7.47115	5.87698	8.2359
										7.69156	5.53277	6.48456		5.7327	13.0305	5.34879
										5.54206	17.1531	6.51859		11.1381	16.8174	5.8965
										14.9817	5.9563	7.39648		7.66759	18.7806	13.3891
										42.7027	15.4708	12.7102		8.77006	7.29999	6.48949
										8.77999	9.00727	5.52521		6.81132	5.42582	8.53034
										5.82323	18.2106	13.5205		6.3559	8.59768	5.19791
										6.60326	13.4574	9.76113		6.52115	20.8582	7.09582
										13.2675	11.0365	9.71596		6.08855	7.68301	5.4291
										21.5508	16.032	5.97331		7.04617	5.56326	10.4184
										6.68397	15.2433	8.26395		5.95206	5.50144	5.5285
										8.4557	6.56892	5.06827		6.67287	12.9643	5.79255
										6.0753	5.22613	7.83104		5.31451	6.85401	13.0169
										6.94131	7.98065	5.46355		5.64548	8.51042	6.83917
										7.63064	10.833	16.0469		6.28315	13.6575	6.29895
										9.23254	18.673	6.4886		5.34433	6.90488	9.75815
										7.88456	12.3274	9.45059		9.74885	5.86289	5.77547
										10.9073	5.13695	10.8913		15.0363	6.43303	5.17992
										8.38508	7.00116	5.81706		9.65331	9.08923
										13.5132	9.11695	8.00262		8.83141	6.76212
										6.38165	6.33628	6.78579		6.7404	5.15781
										5.45515	8.56923	9.23805		9.71195	7.79436
										8.53541	12.3693	10.38		5.66716	9.21132
										6.16759	29.3653	12.3742		13.2859	5.09582
										26.0009	20.7318	7.63277		7.50718	6.8871
										11.1129	29.4711	6.54238		11.1545	13.8009
										13.9507	7.18648	5.16551		6.67481	6.9422
										8.05863	11.3655	7.37562		5.28146	8.43152
										5.09286	15.6525	11.667		5.8721	5.46583
										16.3872	19.0166	5.27291		11.2201	5.59651
										12.1967	5.5383	5.9479		8.27528	8.42843
										6.65625	5.23665	6.07106		12.0187	10.0669
										6.90306	14.471	7.84482		7.02174	7.26586
										9.81498	11.8812	8.98088		5.24833	7.07072
										9.57611	13.5268	10.0498		7.87719	6.05027
										16.8344	9.53622	10.3226		9.39223	6.30309
										13.106	10.3787	11.8478		7.57829	6.02555
										6.35077	9.87645	14.177		6.43501	5.21089
										8.39783	29.5219	5.62573		5.01982	10.9658
										9.26156	17.5321	7.08762		6.3696	5.91607
										8.73398	6.1308	13.2075		10.728	5.8386
										7.20508	23.7075	7.45746		6.594	7.85109
										11.478	15.5824	6.08577		5.07899	7.23704
										5.28661	5.44418	24.7567		6.59975	15.3184
										5.77557	35.1174	9.00303		12.8505	8.92172
										6.53982	15.5825	8.18251		5.25516	7.09208
										6.64067	5.93728	14.9175		7.08957	8.02469
										12.8311	8.70394	6.08181		7.12344	5.63548
										10.8586	9.38733	7.91371		9.31892	5.83081
										8.86298	14.8037	8.43347		5.52086	6.83604
										6.75781	7.33374	6.9294		9.10906	8.1813
										5.31184	22.8243	5.1071		8.01273	5.27161
										5.91341	10.8581	9.21431		7.16721	12.716
										12.867	5.99511	8.50472		9.42703	7.94169
										10.9304	10.1261	5.60261		10.3998	6.11629
										5.41349	6.71954	7.58913		5.44286	5.50294
										7.31989	5.90709	14.5205		6.14679	10.645
										20.0201	18.4775	9.05612		7.00639	5.10064
										11.1217	10.1064	5.968		6.09934	11.7472
										5.51009	13.0414	6.75231		6.2287	19.6215
										5.29284	7.33522	5.46128		5.32719	6.00751
										15.1363	17.6047	8.46153		6.93897	5.77743
										5.82626	10.4867			12.6595	6.63948
										7.32983	12.7648			11.1643	6.91491
										5.12511	5.8662			7.25984	7.81893
										5.12806	5.49512			5.57625	19.8055
										7.38744	5.72621			14.5774	5.46013
										7.47419	6.83089			8.83346	22.096
										7.40718	6.87665			8.19727	8.38155
										9.54977	8.89208			5.31939	15.0098
										5.55356	11.2388			13.1323	7.70206
										9.45956	5.11326			7.30038	7.60326
										6.90148	14.7744			10.8697	9.43915
										5.59834	13.3225			7.97729	8.65859
										6.41056	7.80222			5.10237	5.95339
										8.89536	10.7618			6.99794	11.5423
										11.1417	5.22927			11.761	12.0779
										7.57369	6.92947			6.11794	5.45185
										6.58238	15.562			8.03581	18.7849
										11.6663	19.0242			5.42114	9.56639
										12.1673	10.1705			5.13812	6.03266
										5.93373	8.4141			6.69494	9.80716
										6.79538	5.05111			9.62168	6.35591
										9.85812	10.5844			14.146	7.93455
										5.94913	10.4242			10.3838	7.8826
										5.9815	9.59212			6.4848	6.16119
										10.1436	7.40767			5.24872	8.65264
										5.87419	6.92007			5.96149	5.75982
										6.23412	5.68813			6.59507	6.98871
										10.2902	18.4946			8.81363	7.2752
										9.14943	8.10088			5.89757	10.7526
										5.59119	29.7057			8.41643	8.10368
										8.78778	16.2215			6.47163	15.8677
										11.1154	6.97995			6.30856	15.1998
										27.2873	7.86497			7.79694	5.51321
										6.59482	27.3589			5.25447	18.99
										15.2243	9.15124			24.2915	7.18333
										5.18784	13.252			12.7738	9.32968
										13.6097	13.6898			7.83574	26.8263
										6.3297	13.5606			12.2649	18.9316
										9.39905	7.816			7.45448	13.8847
										5.95546	14.818			7.7575	7.4024
										7.70064	6.90165			5.90168	5.91405
										6.4978	5.19424			7.86256	12.7914
										7.70164	7.4597			9.13367	7.94379
										14.2045	14.9903			8.63694	7.80725
										6.36673	7.44086			8.97534	5.49529
										9.66176	5.33619			6.75393	16.2021
										5.10249	5.52697			5.8255	12.6919
										5.19342	5.49141			23.5832	11.4834
										9.44466	5.35864			6.85778	5.7902
										14.5044	8.41459			8.00691	14.573
										14.2581	5.56196			5.27154	5.60038
										5.20505	9.68349			6.53935	7.64317
										10.9401	24.1985			6.59158	12.7426
										9.82967	7.53626			5.93533	5.63704
										5.45999	9.24518			5.16783	15.8162
										21.2299	7.90405			13.0428	5.26252
										6.50567	8.72178			7.51402	6.61216
										5.67476	14.9026			10.9913	24.286
										7.60315	6.19678			8.11311	7.72985
										6.56391	7.40079			5.51964	7.302
										14.9496	11.6429			5.98418	9.82802
										6.65535	7.95877			7.15545	5.607
										6.52388	7.07349			10.6056	8.49536
										5.55608	6.3626			6.13931	25.2042
										11.6031	8.14664			6.49783	11.1613
										8.92603	9.63625			9.8607	9.26174
										5.33104	13.8414			8.50148	9.55575
										16.9984	7.19668			7.31083	6.58291
										5.38327	9.1648			6.96327	11.967
										5.22887	6.40822			5.41755	14.1007
										6.12214	9.30438			5.92881	6.44489
										5.22338	5.13736			8.3582	13.3784
										17.9235	6.45623			12.0865	10.973
										8.86555	7.09488			11.2516	11.5066
										7.03255	9.95956			8.90687	27.6357
										5.8298	8.24179			9.17473	8.33429
										9.7781	6.27947			7.60057	9.83125
										10.5169	15.4134			6.66568	13.1089
										6.96674	6.31574			6.21065	7.47721
										6.02771	5.80121			12.1442	13.7663
										5.67013	7.80523			5.9379	13.2924
										5.90388	26.1877			10.3053	6.76385
										9.63154	9.54164			7.4043	25.8111
										8.34246	5.47517			5.33149	9.13578
										8.72722	12.8952			6.27029	8.55473
										11.7544	7.59251			8.83001	6.77452
										5.26231	9.46159			6.04136	21.1262
										9.18851	13.2135			9.23391	6.89791
										8.56662	9.18277			9.48218	14.5554
										7.1388	5.15713			8.81264	5.2948
										12.1517	5.47992			10.6045	8.46162
										7.76052	7.06117			16.1049	7.71387
										5.2503	20.0927			6.76094	11.9572
										11.7751	21.5657			9.46038	7.17875
										5.87823	9.559			6.99604	6.78625
										7.71747	11.0852			10.2988	7.49195
										5.82829	8.34554			11.4391	6.98525
										5.73261	5.29932			5.29048	10.9031
										5.03635	8.87056			5.55215	9.94742
										5.55794	12.0288			12.5299	12.9629
										8.15461	8.78314			14.533	10.5417
										7.58235	6.74976			7.25852	8.21958
										6.34745	6.5232			6.93894	16.6427
										5.18579	8.53205			5.20666	7.04158
										8.6568	6.80795			5.6201	6.87353
										6.95644	5.11571			8.63309	15.5122
										7.87729	7.15622			5.42667	5.24606
										5.12738	5.40137			6.59274	6.07887
										9.43975	11.8113			5.04235	7.59085
										5.15747	5.01419			6.76627	21.107
										13.411	7.74407			9.35811	6.72932
										17.8664	7.71942			12.7958	7.02268
										5.9007	7.07918			5.73128	7.28314
										9.08586	6.22077			5.10752	6.91109
										11.8954	6.56428			9.09226	5.55699
										7.79556	15.1707			10.7184	19.1155
										7.98394	6.06244			5.67455	14.0507
										5.15934	6.24108			10.5482	18.9952
										7.57795	9.4114			8.98443	16.6101
										5.34808	11.3327			8.75614	5.73975
										5.06312	10.3028			6.8855	6.63669
										7.4128	9.86274			5.11494	6.58715
										5.9321	6.60041			5.30774	11.5551
										7.45556	24.6946			6.68175	19.3747
										21.7538	5.1178			9.08067	7.37022
										7.39524	10.77			10.6837	8.36934
										8.36548	12.3549			10.439	6.91774
										12.393	14.5646			11.6343	10.4061
										5.04241	6.25507			9.17853	5.39573
										5.90777	5.6787			5.6202	9.98444
										6.27122	9.56466			5.307	13.5248
										7.61338	9.49362			5.74736	9.05097
										6.55796	10.5148			8.30527	5.75451
										5.0162	9.82006			10.8383	15.003
										13.2837	10.0968			8.04127	5.65547
										5.42269	8.13567			11.3375	8.35931
										8.58198	6.26205			10.2014	7.26749
										5.40934	7.01787			5.19072	5.71633
										5.11393	5.59796			8.76507	23.1031
										9.69696	6.26607			12.3935	11.5776
										9.41479	6.69315			9.34713	29.2561
										6.1312	6.43396			6.3054	14.2295
										7.02949	6.12945			5.26403	12.3487
										6.19142	6.076			10.1202	6.57904
										7.77988	6.56386			6.95042	12.1196
										5.31358	5.4537			6.88787	6.07374
										12.6863	5.19122			8.62908	5.65348
										5.58716	6.4345			11.3131	7.1777
										8.73992	6.10038			15.6162	9.52185
										5.63496	12.9173			5.58045	13.9301
										5.38171	7.13897			9.49957	9.66071
										5.65316	14.0505			6.09468	7.4756
										9.50711	5.0565			9.14422	11.8312
										7.99019	20.5409			17.8327	6.97209
										5.84294	8.57705			7.59331	7.54098
										6.41241	5.78868			10.52	6.74447
										5.30159	5.88616			7.97091	10.0852
										5.05872	16.1266			13.6616	10.158
										7.04436	5.81776			8.23871	14.0569
										6.38451	5.52611			6.07772	10.051
										5.18504	8.5069			8.05337	8.90032
										8.688	6.5758			7.67167	11.6976
										5.68356	6.79935			6.18415	11.2919
										5.34539	8.26281			6.08315	21.7849
										5.03876	7.0063			7.89065	9.31822
										5.8703	6.86454			5.18252	7.06093
										11.5135	5.48108			13.016	10.8872
										6.58474	5.43886			10.7227	6.31934
										7.23281	5.25377			6.87997	5.91715
										5.36707	11.0081			12.3251	12.4339
										15.9739	5.0541			9.69436	5.03548
										7.77082	5.77332			11.4019	5.37507
										10.3698	7.76242			11.6319	5.32766
										14.3794	12.0017			8.58467	8.02452
										5.01548	6.36696			10.6724	7.29751
										5.1848	5.55487			5.04453	6.89164
										8.85704	6.46616			5.42649	7.34185
										10.4452	9.38428			11.0516	5.2236
										6.91727	7.66903			5.38712	20.6813
										5.12992	10.7267			13.4675	6.21441
										5.60563	7.07624			5.3666	6.54705
										6.63311	8.11032			5.54548	6.68758
										8.68909	7.14026			6.69456	7.37376
										5.15333	5.45136			6.45181	5.7417
										13.8479	5.29871			15.3468	9.64412
										6.61245	6.99478			14.8806	8.77921
										6.70941	5.781			5.24865	6.21482
										6.85735	5.34604			5.06307	6.43265
										7.58311	27.0748			24.2381	7.89897
										5.48899	5.75413			12.061	5.03336
										6.42841	9.25658			9.66775	6.39921
										5.91059	5.726			21.1837	7.13537
										7.2492	9.64544			8.4448	8.40179
										6.28537	5.61328			16.3559	6.70076
										5.29248	10.3546			8.74361	10.3799
										10.8775	8.06033			17.5202	6.28194
										5.90061	5.0517			10.3186	6.24411
										10.6428	11.6644			10.0807	6.47787
										5.62473	6.26853			5.20116	5.82735
										5.56061	6.2493			5.504	6.58668
										5.91466	5.0664			10.7881	6.51993
										5.31631	11.728			7.53897	8.75171
										6.20559	5.29342			10.8644	5.63167
										5.11435	5.11766			5.42042	6.31316
										5.33779	13.7682			5.22346	6.10808
										6.20972	6.74207			5.57079	9.49835
										5.95544	6.88411			8.8084	5.19508
										6.78672	7.7957			8.30191	8.62458
										6.51595	13.9514			20.4839	7.57416
										7.80064	5.15017			6.53889	8.78341
										7.95077	10.8437			12.4466	9.94526
										6.09904	5.2886			6.15764	5.28152
										5.94272	5.42031			5.50613	5.5278
										5.8718	7.10731			24.0314	5.49777
										5.17253	14.6011			5.79458	5.03019
										5.84449	7.18431			14.8028	5.57036
										10.1879	10.792			10.5291	6.10796
										7.0466	5.11709			6.67871	5.01678
										6.36505	9.03237			14.5515	5.25704
										6.73454	6.77094			6.18902	6.92874
										14.7717	5.83915			6.3245	5.01033
										6.62339	7.68367			8.83347	5.05969
										5.21313	8.8886			16.1435	6.71277
										5.85082	5.98158			17.8054	5.87052
										7.79802	7.36486			7.62495	5.57154
										6.54696	5.24321			5.98576	6.56333
										5.43343	6.22519			7.76594	5.9922
										8.5085	5.17576			5.62453	6.40544
										5.17918	7.68938			7.14759	6.10876
										7.33777	11.1017			7.54629	13.0896
										9.39697	7.32967			8.63908	21.0436
										5.38327	5.89362			5.88343	10.2615
										5.68507	5.57094			9.43293	7.12421
										7.44837	5.24092			6.49208	8.02091
										9.92642	6.74472			9.559	5.90566
										5.09028	6.98691			5.58796	10.0696
										5.30314	9.27071			22.185	8.45184
										5.46003	9.43801			6.66458	5.57201
										12.8889	8.52196			12.646	5.59998
										6.35407	5.90641			6.51784	8.84324
										7.04447	8.75224			5.07815	5.03876
										5.10543	6.87407			5.19781	6.77886
										10.9964	7.8623			8.45284	6.40197
										6.50537	12.1004			7.16313	8.62757
										5.75612	6.67954			15.7589	9.07085
										14.6688	7.87614			10.8768	13.2446
										5.97324	7.75082			14.5626	7.25012
										5.24362	8.61297			6.36378	6.23565
										5.34295	5.38894			7.37948	5.94104
										12.7289	6.16178			8.93158	5.82631
										7.78753	7.16027			11.3685	5.8884
										7.25149	9.62563			5.78448	6.27743
										7.87054	8.97694			5.38505	9.53515
										6.2766	8.96053			5.0909	10.1019
										7.75283	8.99057			13.6495	6.21177
										6.72946	5.31807			12.5078	6.5046
										7.60382	7.99832			6.44775	6.7105
										5.36829	5.74867			12.3321	8.42962
										14.8361	8.27111			15.7281	5.52037
										5.04945	5.71994			11.2615	14.7503
										5.34955	5.26405			9.05072	9.07928
										17.894	7.1428			6.07924	14.0721
										6.39457	5.5796			9.63414	5.41423
										14.6827	6.75566			6.76528	6.05984
										16.5007	5.09388			5.84875	12.0271
										8.45164	5.34405			5.04781	5.11186
										6.17955	13.1237			5.84038	11.2799
										5.31988	6.97958			10.4099	15.7999
										5.37205	11.8646			6.63368	7.91374
										9.73629	16.8742			6.56009	6.26076
										5.40666	6.32913			9.03763	10.0337
										5.22755	10.225			6.37864	6.35834
										5.00247	5.61942			5.95425	7.90209
										5.27125	7.92713			7.10835	5.14732
										5.45038	18.9607			9.35658	10.592
										9.30561	5.63019			10.0537	6.80674
										5.36932	16.2169			6.11312	6.0195
										12.3105	19.3397			6.14503	6.35886
										6.31341	9.81774			5.00444	11.7671
										5.6246	11.9424			9.64744	5.88406
										6.1814	6.57488			12.0532	6.00365
										5.63445	19.1059			6.55685	7.02136
										6.13527	6.394			8.02456	6.74951
										6.77333	8.62223			10.2539	6.0727
										6.69535	11.3609			7.43116	5.96653
										10.4967	5.5764			6.02564	7.28485
										9.48985	13.7018			5.44181	10.3823
										5.98239	10.9664			5.9161	8.42556
										11.072	6.82106			5.18697	10.114
										5.09581	5.92692			5.82215	6.07868
										7.66518	17.1582			5.26705	9.19869
										6.60265	9.54346			7.60395	7.154
										7.5137	29.7111			9.25949	12.8865
										6.91243	10.5886			7.65389	5.12853
										6.04233	7.18784			7.30074	5.55713
										6.71035	8.29533			6.81886	5.73302
										11.3145	15.8492			5.62932	6.91828
										14.1386	6.28531			5.12756	5.13387
										9.26053	5.2666			7.43638	5.50781
										8.20255	5.34222			5.11117	11.2757
										7.17312	24.5676			5.1492	8.91427
										7.7405	6.30421			8.71851	5.1747
										14.3919	6.77493			7.66736	7.05433
										5.36741	12.3296			5.8925	6.92717
										13.6388	6.0187			5.17983	13.5884
										9.51408	10.8007			6.50718	9.79048
										9.63895	11.5801			5.11565	8.20241
										8.85647	17.1057			12.5411	12.7725
										6.87289	17.6733			9.73427	9.8937
										10.6513	5.02763			7.59942	7.36567
										5.19141	9.13984			11.2518	9.42873
										5.58589	9.52193			7.19988	7.42279
										7.06525	5.08674			6.34977	8.39408
										6.27111	8.52292			5.08019	6.8465
										12.7076	5.64428			6.05172	5.85647
										6.55655	6.23394			5.95658	6.9172
										15.4789	7.33104			5.03239	5.64061
										8.86979	6.33703			5.99252	6.74837
										5.71187	15.0903			7.55722	6.80753
										10.4107	6.9618			5.16303	10.3134
										5.23592	10.5303			6.1407	6.88523
										7.40672	10.5629			8.4216	5.33123
										5.79466	17.4087			6.06392	7.68261
										8.36762	5.00726			17.4697	7.80492
										6.74333	14.7171			5.95237	5.70021
										7.08468	10.4257			9.12644	7.65248
										9.47305	5.70003			5.97616	5.12306
										15.6574	7.34671			8.61298	5.9243
										18.4168	14.7524			6.21643	5.99105
										7.90054	5.38552			5.04174	5.96156
										7.47728	5.73737			15.5224	10.4471
										5.48735	7.65233			6.25505	7.46978
										5.72765	5.22537			6.10118	13.1082
										10.0378	6.09962			5.87301	8.95993
										7.14946	5.25516			5.25951	6.33596
										6.86438	6.59616			8.33429	5.95632
										5.84163	6.67902			5.92887	5.4701
										5.31668	5.79402			5.79623	8.9876
										7.36027	11.0672			7.86062	5.26576
										6.45581	6.78989			14.0985
										6.12754	9.78863			14.99
										7.43015	6.36532			5.64095
										5.11788	5.9248			5.857
										11.7618	10.2436			7.2614
										8.85954	5.17227			6.92921
										9.5639	5.16254			5.37249
										6.58561	6.45503			5.03791
										5.89329	9.87956			5.11637
										17.7189	7.97363			5.43677
										6.71592	18.5689			8.27664
										14.9821	8.0833			14.737
										6.46955	6.10954			6.03649
										8.69259	5.26004			6.10317
										10.0264	10.6031			9.22254
										6.76666	10.7984			9.75885
										5.27889	6.53852			6.06478
										13.0576	5.80438			7.48038
										7.94027	8.21538			7.80507
										7.09407	5.98047			7.15233
										6.47294	5.36266			6.88439
										9.19598	5.03672			6.65112
										6.65482	9.5406			11.8301
										8.01733	5.4174			6.23178
										16.3513	5.69174			6.30903
										8.15572	5.30644			5.73607
										6.85758	7.34728			11.8348
										8.45961	5.06231			5.80197
										7.48228	5.464			5.47076
										5.96822	5.64013			5.79946
										7.06659	6.98922			9.35883
										5.51105	5.24158			5.70304
										8.21669				5.9369
										7.46317				5.8598
										10.9111				11.1779
										6.84423				5.82622
										14.7521				7.62186
										6.62446				5.97071
										5.6365				5.79785
										17.6639				6.18646
										10.725				5.68436
										5.73925				6.69427
										6.06626				6.85648
										6.28575				10.4974
										5.17459				9.03182
										6.59839				6.35696
										5.1773				6.68404
										7.35607				6.90556
										11.9884				13.9176
										7.17208				8.15342
										7.18408				11.3463
										6.22566				6.97689
										8.08719				10.925
										5.34769				6.83807
										5.04842				8.90843
										5.51706				7.47291
										5.07035				6.46958
										6.38305				5.10472
										6.90624				13.9695
										9.59635				5.0203
										5.43098				8.08065
										9.97563				6.32824
										9.41422				6.50062
										9.67688				5.83923
										7.46497				7.69151
										11.4151				5.89735
										5.20354				6.39048
										5.2555				6.68168
										7.43772				10.6067
										5.03565				7.91209
										5.84854				5.12457
										6.88304				6.48378
										7.49234				5.07519
										6.88835				5.0573
										5.04607				6.69963
										6.18718				6.45883
										7.54584				5.35952
										6.77219				5.28607
										9.4204				6.35334
										5.06187				18.9589
										5.37386				5.63181
										5.12469				5.50388
										5.73905				6.16815
										5.16476				8.21599
										7.94029				7.07735
										9.54324				18.4023
										6.08822				5.8447
										9.61761				7.01301
										9.76183				13.5275
										13.8473				6.61977
										9.30482				5.04109
										6.28735				5.88756
										8.40432				8.3141
										5.49426				9.77775
										6.28334				5.39463
										8.9883				14.8275
										6.50518				11.9551
										11.4224				8.06151
										5.36254				8.10572
										7.56042				6.11274
										7.14179				8.49203
										8.58935				9.2949
										5.35737				6.36674
										6.44447				7.69792
										5.241				7.23193
										5.35028				7.30585
										7.09147				7.56795
										5.01117				8.37994
										6.05642				6.02479
										6.24752				7.19284
										7.50463				5.90693
										5.86569				5.15624
										5.19816				5.01429
										5.40136				5.11271
										5.08248				26.4121
										7.41066				5.44367
										8.10457				6.37571
										7.42018				5.08376
										6.84047				7.33019
										7.22938				11.1351
										6.70844				5.55983
										8.59846				15.9583
										10.3447				10.0921
										6.03765				12.6098
										7.61264				5.74293
										7.05851				5.07003
										8.6525				6.97437
										8.02616				7.63834
										5.21925				6.55753
										7.082				6.53485
										6.91998				5.0062
										5.94268				7.04973
										6.41783				9.81934
										8.81365				8.02913
										5.08514				10.2486
										6.25193				9.13783
										7.86815				5.7895
										9.20433				6.25816
										6.04429				5.56973
										10.944				9.72629
										7.05812				6.30233
										7.77966				5.39056
										11.3146				11.0987
										8.08636				11.9563
										6.46664				12.288
										7.12705				6.91567
										8.74108				7.18098
										7.11928				5.892
										5.19988				16.6946
										5.42537				6.43083
										8.34134				6.03153
										5.65511				9.5273
										10.4939				6.86013
										7.28872				6.85263
										6.07745				5.62501
										9.46362				6.09347
										5.87344				14.4218
										9.00287				7.38113
										5.0316				12.1079
										5.00079				13.2185
										5.41559				7.48952
										7.0107				5.91307
										8.32848				5.33666
										6.51256				6.12739
										5.75682				7.24689
										5.74598				5.06457
										15.193				6.1792
										5.05296				5.03438
										5.08232				6.64689
										5.72977				10.5095
										5.08004				11.4617
										6.85873				7.074
										7.00846				6.40998
										5.88894				6.18791
										6.41096				21.4505
										6.7477				5.71727
										9.96126				8.47901
										5.38849				6.51039
										5.07865				6.66415
										29.2232				5.59029
										8.60752				5.52864
										5.33146				5.624
										5.79282				5.80013
										9.95003				17.8775
										14.2173				5.5255
										5.19972				8.73036
										8.82915				6.13934
										5.41738				6.22859
										12.2345				5.22537
										7.81488				6.09913
										14.6911				11.1138
										5.31588				8.75404
										5.78108				5.98379
										21.1117				7.48854
										12.8904				6.06798
										5.70643				5.14403
										7.43337				5.14224
										6.10419				6.00497
										9.15383				5.26866
										7.93825				6.01558
										8.90312				7.03729
										9.43213				6.76923
										6.36317				5.44145
										5.14813				8.60139
										22.6609				12.0783
										10.8622				15.1504
										6.99812				6.91498
										7.32057				23.7248
										9.37224				11.6925
										7.71228				10.884
										10.2499				5.95627
										5.93735				14.8411
										5.06184				6.31095
										9.81598				17.761
										5.58078				9.62398
										6.72002				7.11268
										6.59197				11.4667
										5.82428				5.20181
										7.0936				6.5336
										6.24495				15.6226
										5.75615				5.84833
										8.92831				7.5322
										6.35026				6.04652
										5.06766				6.80792
										5.67825				40.5784
										5.28527				7.917
										8.79629				15.9168
										9.1961				5.37711
										5.281				5.08642
										5.87148				15.593
										18.2866				20.3033
										5.9792				5.73498
										6.23233				10.3411
										5.66129				18.2926
										14.3346				6.11618
										6.63391				10.1813
										5.00008				7.39078
										9.25539				6.95361
										5.22059				8.79571
										10.6882				5.63853
										11.2274				9.01465
										5.08486				6.50759
										14.8148				14.5701
										5.30516				12.267
										5.13368				5.55718
										6.09333				5.14722
										9.66944				9.76164
										6.84464				5.34212
										13.1996				5.583
										7.46975				7.41649
										9.48243				43.9918
										10.9828				7.03908
										6.67721				5.58806
										5.72011				8.36678
										6.91135				10.4604
										5.8319				23.386
										13.1519				7.28659
										19.1715				29.1217
										5.74804				15.0846
										5.89252				7.34929
										6.05774				18.1748
										24.6554				7.40982
										6.35399				8.09899
										5.6421				14.2416
										8.25069				10.4111
										5.16686				8.66574
										8.01875				7.58694
										9.27802				5.56217
										14.3971				22.56
										5.80465				10.0071
										6.05139				9.95103
										7.22443				5.49325
										9.87099				5.43456
										10.8807				13.5038
										5.91278				5.82894
										5.83635				5.15387
										8.1855				14.5991
										6.571				7.68289
										5.65292				5.25521
										6.31409				11.7485
										23.547				9.152
										5.59914				6.24442
										7.28562				12.1746
										7.52904				14.2014
										6.11291				16.0812
										5.12321				8.17597
										13.4849				14.431
										5.33972				7.92219
										5.27705				8.74187
										10.0459				15.511
										7.7874				24.2665
										5.94911				11.2099
										5.00451				6.9438
										7.57649				14.3809
										7.89218				7.11101
										8.49403				15.8281
										5.41058				10.3405
										11.2284				5.09968
										8.31918				6.63839
										12.8854				8.72784
										5.02636				18.1142
										6.44051				6.44743
										6.55367				7.66381
										7.07904				17.623
										8.13941				14.0643
										22.1083				23.5652
										10.2162				7.13138
										6.68933				6.43631
										5.32935				9.81892
										5.65992				5.91615
										7.49828				6.06611
										11.4945				25.395
										6.09404				17.5366
										9.01596				5.65811
										6.69634				10.3531
										8.8389				10.3561
										10.594				9.41568
										9.86608				8.37599
										10.7508				24.6399
										18.1885				8.85421
										7.17776				33.8567
										6.45055				12.4894
										6.99939				7.50005
										5.65829				18.9674
										5.64577				9.69615
										13.4585				10.1447
										6.10799				5.00986
										5.41804				16.2251
										6.9728				8.20825
										5.05908				18.5583
										9.28404				27.613
										6.34393				5.90916
										7.17859				11.6196
										6.74938				14.4377
										5.02155				6.29754
										6.91185				22.1063
										5.10229				12.2366
										9.45914				13.3721
										10.39				11.9969
										9.19043				10.7428
										9.7691				15.854
										5.21607				6.03836
										5.9704				24.2842
										6.29958				12.2826
										12.5229				7.69666
										7.28134				9.42441
										6.44365				8.306
										5.5018				7.37633
										15.2474				24.6563
										11.546				13.0713
										6.27333				5.40344
										8.54546				19.0195
										5.2315				15.6467
										5.13678				5.02178
										6.74259				5.81619
										7.57876				8.61486
										11.7495				5.48336
										8.04597				8.16864
										5.18859				10.0561
										7.9612				8.06547
										5.3711				6.46334
										6.11484				6.35115
										12.5842				8.03654
										7.86856				6.79062
										8.12349				14.7668
										5.24544				5.57382
										5.72388				35.8364
										8.42776				8.17515
										13.8814				5.95009
										7.97656				15.114
										6.54338				11.8759
										14.3395				13.0907
										9.98337				6.72297
										7.54194				12.3242
										7.30303				5.33558
										5.83682				6.03167
										10.7983				18.0514
										6.32072				5.48156
										5.98236				6.00678
										8.46745				10.8363
										10.5926				14.8448
										7.21732				32.7695
										6.99689				8.5607
										10.5577				16.1716
										7.76329				10.9085
										6.51866				6.14707
										7.08367				6.72882
										14.5896				14.4526
										11.0081				20.2616
										17.4788				6.85887
										6.38005				5.4118
										5.32504				6.62006
										5.21268				12.6616
										6.86601				10.384
										13.4655				8.64055
										5.87763				9.41719
										5.19032				5.91921
										5.09091				10.7442
										5.04666				6.02086
										11.5826				6.81578
										9.0483				17.2176
										16.0188				13.0685
										5.38321				13.2136
										6.39509				15.9559
										12.861				7.18507
										11.1239				10.3252
										5.96484				6.47032
										5.19374				7.40223
										8.32679				10.2901
										7.57211				17.8032
										11.1433				12.3322
										8.96273				18.0652
										6.11532				12.893
										6.20374				13.1538
										5.17327				11.461
										9.77862				6.11346
										8.16634				5.36202
										5.36585				8.615
										5.85872				12.5089
										8.38708				13.096
										5.61036				7.32253
										5.45618				16.6207
										7.32316				8.96399
										5.2624				8.14074
										14.8798				7.08405
										9.42561				14.5979
										5.29716				15.9027
										6.93556				6.87452
										5.0855				9.59004
										8.01578				12.1948
										6.78652				12.592
										8.34601				5.30638
										6.25875				11.9181
										8.40605				12.2133
										21.2686				6.9367
										5.99621				9.77228
										5.18011				6.30035
										5.45693				5.28777
										8.39999				23.9041
										5.60185				5.75793
										6.85047				5.70356
										5.1636				19.9637
										5.6916				7.14505
										5.7132				11.653
										5.00876				5.97782
										6.62511				11.039
										6.71982				15.8924
										5.11523				9.20655
										7.54382				6.02213
										5.14375				10.746
										7.39701				5.94208
										6.39223				5.22153
										6.49949				5.81565
										6.62752				7.47445
										5.69025				5.61277
										5.10259				16.7257
										9.17602				10.548
										7.93873				8.61289
										6.29871				5.70575
										6.09416				7.4804
										5.11568				8.99556
										6.06797				28.5351
										5.69247				13.132
										5.06498				5.95598
										5.72473				10.4669
										5.28495
										5.21986
										5.00943
										7.01708
										6.97795
										9.8394
										7.74561
										5.6599
										5.31451
										5.88372
										6.05024
										5.15185
										8.45762
										5.37602
										9.09218
										5.10674
										6.26678
										6.42415
										6.44953
										5.80878
										5.3309
										5.89768
										5.33288
										5.68682
										5.79607
										6.10239
										5.21422
										5.96974
										9.36775
										7.21161
										7.07979
										7.46503
										6.1663
										5.22427
										6.44603
										6.43121
										5.89604
										5.92657
										5.71628
										5.28405
										5.27461
										6.78422
										6.86622
										5.00769
										5.04637
										5.74249
										7.06445
										5.33097
										6.49774
										5.43005
										5.80133
										6.0042
										5.06325
										8.15633
										6.09697
										5.59829
										7.98323
										8.601
										9.17024
										5.30736
										6.19636
										5.51506
										5.44696
										5.96451
										5.88489
										5.4029
										6.14976
										16.0406
										6.56327
										8.70098
										5.45265
										5.54922
										8.57526
										6.0448
										7.05178
										5.59889
										5.9798
										5.86967
										5.54605
										7.19169
										5.14382
										6.95992
										7.99499
										6.48641
										5.13832
										7.54945
										6.06187
										5.1783
										5.1594
										5.47237
										6.60516
										6.75871
										6.49849
										5.06214
										7.32696
										8.27546
										5.90443
										6.59736
										6.42498
										6.24454
										5.08454
										5.60298
										6.01255
										6.9761
										5.25554
										7.68489
										7.11873
										6.39029
										7.00965
										8.5387
										7.04391
										5.51874
										5.86792
										5.07955
										6.46923
										6.16094
										5.38521
										9.00201
										5.32962
										8.19804
										5.31279
										5.12875
										5.72598
										6.2506
										8.42479
										5.87105
										5.16991
										5.3451
										5.23763
										5.40222
										5.36299
										5.45293
										6.56999
										5.07907
										7.03772
										9.92601
										6.13471
										6.50474
										5.52477
										6.845
										5.69928
										7.13813
										6.16274
										5.53828
										5.90241
										5.83109
										5.32167
										6.53716
										8.17821
										6.20751
										7.14757
										6.93145
										9.61325
										5.20453
										5.22273
										6.07734
										7.17192
										6.42971
										5.18264
										6.32756
										5.90182
										5.39067
										5.98574
										5.59169
										6.94553
										5.08362
										6.32864
										5.15485
										5.10473
										5.41942
										5.65808
										6.18571
										5.2345
										6.06643
										6.32193
										5.01002
										5.53187
										5.13635
										6.01115
										6.18845
										5.36221
										5.35446
										6.02681
										5.4528
										8.28427
										8.77239
										5.6615
										6.52689
										8.29993
										7.68939
										9.13925
										5.14714
										11.1801
										5.15683
										6.84373
										5.62776
										5.13919
										6.00612
										5.97812
										6.44475
										5.952
										7.12898
										6.04221
										5.56188
										13.046
										6.32753
										11.5085
										8.09544
										12.8652
										6.37541
										5.13604
										6.75008
										5.63418
										5.25156
										5.01703
										5.2014
										5.84995
										5.04358
										5.52039
										5.00761
										7.91239
[truncated: 78 more rows]
