# Supplementary material for: Pathway-specific dysregulation of striatal excitatory synapses by LRRK2 mutations
Source: eLife. 2020 Oct 2;9:e58997. doi: 10.7554/eLife.58997 (PMC7609054; doi:10.7554/eLife.58997)
Supplement: Figure 5—source data 1. [file elife-58997-fig5-data1.xlsx]

## Sheet: Figure5B
D1Cre;eGFP AAV (/10μm)				A2ACre;eGFP AAV (/10μm)
+/+	+/RC	+/GS		+/+	+/RC	+/GS
18.735	19.775	19.785		12.165	24.25	28.185
20.3967	21.2067	19.4		14.2	15.405	19.4
16.505	26.07	27.53		18.455	22.36	28.645
12.97	11.96	21.82		35.7	21.38	25.42
15.655	26.82	15.08		16.18	19.555	31.645
16.2867	16.1	12.29		38.73	42.07	11.28
14.045	13.29	25.89		9.31667	12.68	11.685
22.365	13.045	14.935		9.28	19.26	17.935
28.75	19.22	11.675		11.28	21.555	11.81
12.6	12.035	12.955			17.245	25.095
13.86	13.465	14.975			12.91
11.15	20.8				19.36
12.495					16.45
12.99					22.19

## Sheet: Figure5C
D1Cre;eGFP AAV (μm)				A2ACre;eGFP AAV (μm)
+/+	+/RC	+/GS		+/+	+/RC	+/GS
0.454328	0.420682	0.404952		0.436272	0.391102	0.375336
0.500218	0.365572	0.349932		0.435675	0.30846	0.377644
0.491956	0.376425	0.352403		0.414003	0.36739	0.387504
0.459395	0.341614	0.357644		0.345787	0.378125	0.359793
0.490093	0.341429	0.328294		0.373542	0.351672	0.386512
0.388963	0.346287	0.435318		0.323594	0.341296	0.442134
0.385991	0.447215	0.530189		0.411178	0.472712	0.424318
0.361874	0.436781	0.456105		0.433623	0.512569	0.462676
0.314699	0.450826	0.460583		0.43602	0.442423	0.45779
0.458385	0.447861	0.448432			0.465066	0.544307
0.450755	0.452544	0.448432			0.508659
0.504084	0.446442				0.438269
0.466067					0.465101
0.451995					0.522924

## Sheet: Figure5D
D1Cre;eGFP AAV (μm)				A2ACre;eGFP AAV (μm)
+/+	+/RC	+/GS		+/+	+/RC	+/GS
1.46758	1.20526	1.14074		1.2397	1.13109	0.899873
1.25581	1.08225	1.09616		1.11179	1.24561	1.16621
1.07161	1.06104	0.952372		1.04157	1.06304	1.0933
1.14499	1.55553	1.02326		1.03063	0.965951	1.03607
0.979969	1.05597	1.44358		1.01477	1.48927	1.09553
1.17999	1.15464	1.23555		0.961146	1.08902	1.59814
1.11422	1.38671	1.17382		1.1403	1.32821	1.70017
1.23503	1.13296	1.16286		1.19629	1.14267	1.43554
0.846709	1.07861	1.19632		1.29344	1.6803	1.24105
1.13647	1.21298	1.16384			1.25053	1.16755
1.38396	1.23949	1.19077			1.41236
1.20126	1.30634				1.38795
1.24442					1.40812
1.3144					1.22892

## Sheet: Figure5F
D1Cre;eGFP AAV (/10μm)										A2ACre;eGFP AAV (/10μm)
stuby			mushroom			filopodia				stuby			mushroom			filopodia
+/+	+/RC	+/GS	+/+	+/RC	+/GS	+/+	+/RC	+/GS		+/+	+/RC	+/GS	+/+	+/RC	+/GS	+/+	+/RC	+/GS
3.275	4.4	5.955	1.08	2.69	4.27	14.375	12.68	9.565		1.54	7.53	12.74	1.98	2.9	2.385	8.65	13.82	13.065
6.1	7.255	5.245	2.18	2.63	1.59	17.42	11.865	10.555		1.835	4.275	5.93333	1.195	0.905	3.17667	11.175	10.225	10.8867
5.51	9.76	11.495	1.345	2.62	1.315	9.645	13.695	14.725		5.61	8.97	10.045	1.66	0.84	4.075	11.175	12.555	14.53
2.115	3.46	7.505	2.225	2.6	2.335	8.63	6.92	11.98		13.005	8.575	10.56	2.575	1.065	3.13	20.125	11.745	11.73
4.83	10.3	1.88	0.755	1.35	2.12	10.08	15.17	11.07		5.18	4.28	11.225	3.295	2.475	3.005	7.705	12.795	17.365
2.615	4.775	3.66	2.55	2.025	3.32	11.125	9.315	5.32		16.93	14.885	0.78	1.26	1.52	1.56	20.54	25.67	8.95
4.13	4.33	7.93	1.27	0.93	1.4	7.94	14.24	16.56		2.725	2.5	1.02	1.92	2.56	1.895	6.12	7.435	8.775
7.185	4.14	3.85	2.195	0.415	1.25	12.98	8.49	9.88		1.795	3.625	2.435	1.19	2.085	2.49	6.725	16.97	13.01
13.99	4.81	2.86	1.555	3.6	1.34	13.205	10.81	7.47		1.61	2.9	1.15	1.335	1.36	1.295	8.33	17.295	9.355
1.48	1.89	3.06	2.37	1.69	0.2	8.3	8.455	8.7			4.1	7.285		1.24	3.67		11.91	14.145
1.495	3.21	3.39	1.07	1.085	1	11.305	9.165	10.59			2.35			1.76			8.8
2.055	4.085		1.84	1.285		7.25	15.435				3.06			1.505			14.8
1.555	1.555		2.83	2.83		8.105	8.105				2.765			1.795			11.89
1.69	1.69		1.73	1.73		7.88	7.88				5.84			3.89			12.46
