# Supplementary material for: Pathway-specific dysregulation of striatal excitatory synapses by LRRK2 mutations
Source: eLife. 2020 Oct 2;9:e58997. doi: 10.7554/eLife.58997 (PMC7609054; doi:10.7554/eLife.58997)
Supplement: Figure 6—source data 1. [file elife-58997-fig6-data1.xlsx]

## Sheet: Figure6E
GFP-
+/+	+/RC	+/GS
-26.9761	-28.9031	-26.3631
-20.0235	-21.8798	-20.5979
-19.6597	-21.3799	-18.8884
-15.8566	-19.6657	-16.9203
-12.1841	-16.7662	-16.7666
-9.6632	-14.818	-15.1514
-9.3835	-14.6933	-14.0964
-8.0497	-13.8947	-11.8028
-7.097	-12.6206	-11.4115
-6.261	-11.8444	-11.1117
-5.6127	-11.6412	-10.0533
-5.5896	-11.5207	-9.6521
-5.4096	-10.3606	-9.5478
-4.8388	-7.9174	-9.2716
-2.9077	-6.7221	-7.4827
-2.3906	-5.2211	-7.2528
-2.0892	-4.4492	-7.0662
0.7991	-4.1484	-6.0699
	-4.1255	-5.9512
	-2.7929	-5.8884
	-2.5135	-4.6809
	-67.4652	-4.6162
	-63.9916	-2.746
	-51.9716	-2.6337
	-21.9059	-1.5346
	-16.9624	-1.1955
	-9.894	-0.907
		0.1735

## Sheet: Figure6F
GFP+
+/+	+/RC	+/GS
-46.9927	-24.8067	-32.4755
-43.7663	-11.0567	-22.2617
-26.1164	-8.8774	-17.2095
-23.8617	-8.4369	-10.9509
-23.5103	-7.8489	-9.2791
-23.3029	-5.8291	-9.1282
-21.4927	-5.4743	-8.5143
-20.3371	-4.8982	-8.1198
-19.5201	-3.8596	-7.9499
-19.3348	-3.8383	-7.5326
-19.0949	-3.6767	-7.4138
-19.0003	-2.9826	-6.7429
-17.4913	-2.7959	-6.0841
-17.3293	-2.6294	-5.9429
-17.1382	-2.365	-5.7886
-11.5086	-1.4344	-4.3001
-11.1652	-1.2239	-3.7873
-10.7858	-1.0209	-0.4443
-10.0112	-0.6112	-0.3663
-9.6896	-0.3402	-0.2431
-9.6223	-23.8901	0.1263
-9.5499	-23.8194
-9.3623	-20.1892
-8.6364	-14.1267
-8.4842	-11.4574
-8.2763	-10.7386
-8.1913	-10.4916
-8.017	-8.1764
-7.7462	-6.3316
-7.5808	-6.0153
-7.5716	-5.596
-7.0494	-4.8545
-7.0114	-4.6982
-6.8824	-4.4449
-6.7278	-4.1423
-6.6724	-3.3463
-6.4446	-2.5581
-6.1977
-5.6359
-5.4224
-5.3573
-5.1997
-5.1438
-5.0344
-4.9442
-4.7774
-4.6898
-4.4969
-4.3555
-4.2699
-3.9735
-3.9735
-3.842
-3.7816
-3.1971
-3.1238
-3.049
-3.0431
-2.9509
-2.3149
-2.1729
-1.8077
-1.4878
-1.3195
-24.2
